# Supplementary material for: Validation of Candidate Gene-Based Markers and Identification of Novel Loci for Thousand-Grain Weight in Spring Bread Wheat
Source: Front Plant Sci. 2019 Sep 26;10:1189. doi: 10.3389/fpls.2019.01189 (PMC6775465; doi:10.3389/fpls.2019.01189)
Supplement: Supplementary file 1 [file Table_1.xlsx]

## Sheet: Sheet1
Supplementary Table S1	Entries of five elite yield trails (EYT) and WAMI datasets used in the present study
Dataset	GID	Cross
EYT2011-12	6334286	WAXWING/4/SNI/TRAP#1/3/KAUZ*2/TRAP//KAUZ/5/KIRITATI//ATTILA*2/PASTOR
EYT2011-12	6336223	WBLL1*2/BRAMBLING//KACHU/3/KIRITATI/WBLL1
EYT2011-12	6336589	ALTAR 84/AE.SQUARROSA (221)//3*BORL95/3/URES/JUN//KAUZ/4/WBLL1/5/KACHU/6/KIRITATI//PBW65/2*SERI.1B
EYT2011-12	6337319	PFAU/SERI.1B//AMAD/3/WAXWING/4/AKURI/5/PFAU/SERI.1B//AMAD/3/WAXWING
EYT2011-12	6334281	WAXWING/4/SNI/TRAP#1/3/KAUZ*2/TRAP//KAUZ/5/KIRITATI//ATTILA*2/PASTOR
EYT2011-12	6341928	BL2064//SW89-5124*2/FASAN/3/TILHI*2/5/KAUZ//ALTAR 84/AOS/3/KAUZ/4/SW94.15464
EYT2011-12	6341922	BL2064//SW89-5124*2/FASAN/3/TILHI*2/5/KAUZ//ALTAR 84/AOS/3/KAUZ/4/SW94.15464
EYT2011-12	6332096	CHIBIA//PRLII/CM65531/3/FISCAL/4/PFAU/SERI.1B//AMAD/3/WAXWING
EYT2011-12	6338512	WBLL1*2/VIVITSI//AKURI/3/WBLL1*2/BRAMBLING
EYT2011-12	6333186	PFAU/SERI.1B//AMAD/3/WAXWING/4/WBLL1*2/BRAMBLING
EYT2011-12	6334279	WAXWING/4/SNI/TRAP#1/3/KAUZ*2/TRAP//KAUZ/5/KIRITATI//ATTILA*2/PASTOR
EYT2011-12	6335007	FRANCOLIN #1/MESIA//MUNAL #1
EYT2011-12	6335009	FRANCOLIN #1/MESIA//MUNAL #1
EYT2011-12	6333181	PFAU/SERI.1B//AMAD/3/WAXWING/4/WBLL1*2/BRAMBLING
EYT2011-12	6335276	MILAN/S87230//BAV92/3/WBLL1*2/BRAMBLING/4/WBLL1*2/BRAMBLING
EYT2011-12	6337336	PFAU/SERI.1B//AMAD/3/WAXWING/4/AKURI/5/PFAU/SERI.1B//AMAD/3/WAXWING
EYT2011-12	6341711	MILAN/S87230//BAV92*2/3/MUU
EYT2011-12	6336482	KIRITATI/WBLL1//MESIA/3/KIRITATI/WBLL1
EYT2011-12	6337203	TRCH/AKURI #1//PCAFLR
EYT2011-12	6336597	ALTAR 84/AE.SQUARROSA (221)//3*BORL95/3/URES/JUN//KAUZ/4/WBLL1/5/KACHU/6/KIRITATI//PBW65/2*SERI.1B
EYT2011-12	6341946	BABAX/LR42//BABAX*2/3/KUKUNA/4/TAM200/PASTOR//TOBA97/5/QUAIU
EYT2011-12	6337327	PFAU/SERI.1B//AMAD/3/WAXWING/4/AKURI/5/PFAU/SERI.1B//AMAD/3/WAXWING
EYT2011-12	6337320	PFAU/SERI.1B//AMAD/3/WAXWING/4/AKURI/5/PFAU/SERI.1B//AMAD/3/WAXWING
EYT2011-12	6338326	WBLL1*2/BRAMBLING//JUCHI/3/WBLL1*2/BRAMBLING
EYT2011-12	6341728	MILAN/S87230//BAV92*2/3/AKURI #1
EYT2011-12	6337233	PFAU/SERI.1B//AMAD/3/WAXWING*2/4/HAWFINCH #1
EYT2011-12	6342813	ATTILA/3*BCN//BAV92/3/TILHI/4/PFAU/SERI.1B//AMAD/3/WAXWING/5/PFAU/SERI.1B//AMAD/3/WAXWING
EYT2011-12	6339648	HUIRIVIS #1/MUU//WBLL1*2/BRAMBLING
EYT2011-12	6337227	PFAU/SERI.1B//AMAD/3/WAXWING*2/4/HAWFINCH #1
EYT2011-12	6337349	PFAU/SERI.1B//AMAD/3/WAXWING/4/TECUE #1/5/PFAU/SERI.1B//AMAD/3/WAXWING
EYT2011-12	6341838	WBLL1/KUKUNA//TACUPETO F2001*2/6/PVN//CAR422/ANA/5/BOW/CROW//BUC/PVN/3/YR/4/TRAP#1
EYT2011-12	6336494	KIRITATI/WBLL1/4/2*BABAX/LR42//BABAX*2/3/KURUKU
EYT2011-12	6336132	FRANCOLIN #1//WBLL1*2/BRAMBLING/3/MUNAL #1
EYT2011-12	6341839	WBLL1/KUKUNA//TACUPETO F2001*2/6/PVN//CAR422/ANA/5/BOW/CROW//BUC/PVN/3/YR/4/TRAP#1
EYT2011-12	6341870	MILAN/S87230//BAV92*2/3/AKURI
EYT2011-12	6331710	ALTAR 84/AE.SQUARROSA (221)//3*BORL95/3/URES/JUN//KAUZ/4/WBLL1/5/TACUPETO F2001*2/BRAMBLING
EYT2011-12	6337375	CHIBIA//PRLII/CM65531/3/FISCAL/4/CROSBILL #1/5/CHIBIA//PRLII/CM65531/3/FISCAL
EYT2011-12	6341746	MILAN/S87230//BAV92*2/3/AKURI #1
EYT2011-12	6341747	MILAN/S87230//BAV92*2/3/AKURI #1
EYT2011-12	6341868	MILAN/S87230//BAV92*2/3/AKURI
EYT2011-12	6331702	ALTAR 84/AE.SQUARROSA (221)//3*BORL95/3/URES/JUN//KAUZ/4/WBLL1/5/TACUPETO F2001*2/BRAMBLING
EYT2011-12	6329503	MUNAL #1/KBIRD
EYT2011-12	6328415	KACHU/KINGBIRD #1
EYT2011-12	6339337	PBW343*2/KUKUNA//MUU/3/PBW343
EYT2011-12	6337039	FRNCLN*2/TECUE #1
EYT2011-12	6341533	PFAU/WEAVER*2//TUKURU/4/BABAX/LR42//BABAX*2/3/KURUKU/5/QUAIU
EYT2011-12	6339339	PBW343*2/KUKUNA//MUU/3/PBW343
EYT2011-12	6341535	PFAU/WEAVER*2//TUKURU/4/BABAX/LR42//BABAX*2/3/KURUKU/5/QUAIU
EYT2011-12	6342981	KLEIN DON ENRIQUE*2/3/FRET2/WBLL1//TACUPETO F2001
EYT2011-12	6342983	KLEIN DON ENRIQUE*2/3/FRET2/WBLL1//TACUPETO F2001
EYT2011-12	6342982	KLEIN DON ENRIQUE*2/3/FRET2/WBLL1//TACUPETO F2001
EYT2011-12	6328328	KAUZ*2/MNV//KAUZ/3/MILAN/4/BAV92/5/KBIRD
EYT2011-12	6337030	FRNCLN*2/TECUE #1
EYT2011-12	6338361	WBLL1*2/BRAMBLING*2//MUU
EYT2011-12	6337034	FRNCLN*2/TECUE #1
EYT2011-12	6339334	PBW343*2/KUKUNA//MUU/3/PBW343
EYT2011-12	6337032	FRNCLN*2/TECUE #1
EYT2011-12	6338598	KACHU*2/BACEU #1
EYT2011-12	6342979	KLEIN DON ENRIQUE*2/3/FRET2/WBLL1//TACUPETO F2001
EYT2011-12	6341523	MUNAL #1*2/5/OASIS/SKAUZ//4*BCN/3/PASTOR/4/KAUZ*2/YACO//KAUZ
EYT2011-12	6341520	MUNAL #1/FRANCOLIN #1//WAXWING*2/TUKURU
EYT2011-12	6330513	FRANCOLIN #1*2/KINGBIRD #1
EYT2011-12	6337262	PFAU/SERI.1B//AMAD/3/WAXWING*2/4/HUIRIVIS #1
EYT2011-12	6335088	PAURAQ/4/PFAU/SERI.1B//AMAD/3/WAXWING/5/PFAU/SERI.1B//AMAD/3/WAXWING
EYT2011-12	6341439	WBLL1*2/BRAMBLING/3/KIRITATI//PBW65/2*SERI.1B
EYT2011-12	6342886	WBLL1*2/VIVITSI//MESIA/3/KIRITATI/WBLL1
EYT2011-12	6342881	WBLL1*2/VIVITSI//MESIA/3/KIRITATI/WBLL1
EYT2011-12	6342880	WBLL1*2/VIVITSI//MESIA/3/KIRITATI/WBLL1
EYT2011-12	6337291	PFAU/SERI.1B//AMAD/3/WAXWING*2/4/MUU
EYT2011-12	6332963	KIRITATI/WBLL1//FRANCOLIN #1
EYT2011-12	6332962	KIRITATI/WBLL1//FRANCOLIN #1
EYT2011-12	6331631	PBW65/2*PASTOR/3/KIRITATI//ATTILA*2/PASTOR
EYT2011-12	6338260	WBLL1*2/BRAMBLING//HUIRIVIS #1/3/WBLL1*2/BRAMBLING
EYT2011-12	6332960	KIRITATI/WBLL1//FRANCOLIN #1
EYT2011-12	6338146	WBLL1*2/BRAMBLING//HAWFINCH #1/3/VILLA JUAREZ F2009
EYT2011-12	6342878	WBLL1*2/VIVITSI//MESIA/3/KIRITATI/WBLL1
EYT2011-12	6339347	PBW343*2/KUKUNA//MUU/3/PBW343
EYT2011-12	6341425	WBLL1*2/BRAMBLING//WBLL1*2/BRAMBLING
EYT2011-12	6333922	MUNAL//WAXWING*2/TUKURU
EYT2011-12	6333924	MUNAL//WAXWING*2/TUKURU
EYT2011-12	6337041	FRNCLN*2/TECUE #1
EYT2011-12	6337045	FRNCLN*2/TECUE #1
EYT2011-12	6341218	BAV92//IRENA/KAUZ/3/HUITES/4/KIRITATI//PRL/2*PASTOR
EYT2011-12	6341214	BAV92//IRENA/KAUZ/3/HUITES/4/KIRITATI//PRL/2*PASTOR
EYT2011-12	6342667	FRANCOLIN #1//WBLL1*2/BRAMBLING/3/WBLL1*2/BRAMBLING
EYT2011-12	6333834	TUKURU//BAV92/RAYON/3/MUNAL #1
EYT2011-12	6329692	WBLL1*2/4/YACO/PBW65/3/KAUZ*2/TRAP//KAUZ/5/KINGBIRD #1
EYT2011-12	6332749	KIRITATI//PRL/2*PASTOR/3/FRANCOLIN #1
EYT2011-12	6332626	KIRITATI//ATTILA*2/PASTOR/3/AKURI
EYT2011-12	6332623	KIRITATI//ATTILA*2/PASTOR/3/AKURI
EYT2011-12	6332621	KIRITATI//ATTILA*2/PASTOR/3/AKURI
EYT2011-12	6341683	SERI.1B*2/3/KAUZ*2/BOW//KAUZ*2/4/HUIRIVIS #1
EYT2011-12	6332617	KIRITATI//ATTILA*2/PASTOR/3/AKURI
EYT2011-12	6328357	KACHU/KIRITATI
EYT2011-12	6332970	KIRITATI/WBLL1//FRANCOLIN #1
EYT2011-12	6333972	MUNAL//WBLL1*2/BRAMBLING
EYT2011-12	6334704	WBLL4/KUKUNA//WBLL1/3/WBLL1*2/BRAMBLING
EYT2011-12	6334706	WBLL4/KUKUNA//WBLL1/3/WBLL1*2/BRAMBLING
EYT2011-12	6338060	ROLF07/HUIRIVIS #1//TACUPETO F2001*2/KIRITATI
EYT2011-12	6343525	WBLL1*2/BRAMBLING*2/3/PASTOR//MUNIA/ALTAR 84
EYT2011-12	6332875	KIRITATI/4/SERI.1B*2/3/KAUZ*2/BOW//KAUZ/5/KIRITATI/WBLL1
EYT2011-12	6343439	CHIBIA//PRLII/CM65531/3/FISCAL/4/OR791432/VEE#3.2//MILAN/5/PFAU/SERI.1B//AMAD/3/WAXWING
EYT2011-12	6336904	FRANCOLIN #1*2/HAWFINCH #1
EYT2011-12	6343553	TACUPETO F2001*2/KIRITATI/4/BABAX/LR42//BABAX*2/3/KURUKU
EYT2011-12	6343551	TACUPETO F2001*2/KIRITATI/4/BABAX/LR42//BABAX*2/3/KURUKU
EYT2011-12	6343309	WBLL1*2/BRAMBLING*2//HEILO
EYT2011-12	6343305	WBLL1*2/BRAMBLING*2//HEILO
EYT2011-12	6340037	PFAU/MILAN//FISCAL/3/TAM200/PASTOR//TOBA97/5/PICUS/3/KAUZ*2/BOW//KAUZ/4/TILHI
EYT2011-12	6339164	INQALAB 91*2/KUKUNA*2//HUIRIVIS #1
EYT2011-12	6339163	INQALAB 91*2/KUKUNA*2//HUIRIVIS #1
EYT2011-12	6342002	WAXWING/4/SNI/TRAP#1/3/KAUZ*2/TRAP//KAUZ*2/5/KAUZ//ALTAR 84/AOS/3/KAUZ/4/SW94.15464
EYT2011-12	6343576	FRANCOLIN #1/4/2*BABAX/LR42//BABAX*2/3/KURUKU
EYT2011-12	6341276	TACUPETO F2001*2/BRAMBLING/4/BABAX/LR42//BABAX*2/3/KURUKU
EYT2011-12	6343570	FRANCOLIN #1/4/2*BABAX/LR42//BABAX*2/3/KURUKU
EYT2011-12	6341273	TACUPETO F2001*2/BRAMBLING/4/BABAX/LR42//BABAX*2/3/KURUKU
EYT2011-12	6343479	PFAU/MILAN//FISCAL/3/SOROCA/4/MILAN/S87230//BAV92
EYT2011-12	6333798	THELIN/3/BABAX/LR42//BABAX/4/BABAX/LR42//BABAX/5/KIRITATI
EYT2011-12	6333314	PFAU/SERI.1B//AMAD/3/WAXWING/4/AKURI #1
EYT2011-12	6335612	CNO79//PF70354/MUS/3/PASTOR/4/BAV92/5/WBLL1*2/BRAMBLING/6/WBLL1*2/BRAMBLING
EYT2011-12	6333315	PFAU/SERI.1B//AMAD/3/WAXWING/4/AKURI #1
EYT2011-12	6341058	STLN/4/PFAU/SERI.1B//AMAD/3/WAXWING
EYT2011-12	6336708	ATTILA*2/PBW65*2//HAWFINCH #1
EYT2011-12	6332107	CHIBIA//PRLII/CM65531/3/SKAUZ/BAV92/4/MUNAL #1
EYT2011-12	6332106	CHIBIA//PRLII/CM65531/3/SKAUZ/BAV92/4/MUNAL #1
EYT2011-12	6332342	KACHU//WBLL1*2/BRAMBLING
EYT2011-12	6332341	KACHU//WBLL1*2/BRAMBLING
EYT2011-12	6330283	ONIX/KBIRD
EYT2011-12	6334635	WBLL1*2/KURUKU/4/PFAU/SERI.1B//AMAD/3/WAXWING
EYT2011-12	6342011	WAXWING/4/SNI/TRAP#1/3/KAUZ*2/TRAP//KAUZ*2/5/WHEAR
EYT2011-12	6333692	THELIN#2/TUKURU//KIRITATI
EYT2011-12	6333694	THELIN#2/TUKURU//KIRITATI
EYT2011-12	6336601	ALTAR 84/AE.SQUARROSA (221)//3*BORL95/3/URES/JUN//KAUZ/4/WBLL1/5/KACHU/6/KIRITATI//PBW65/2*SERI.1B
EYT2011-12	6333213	PFAU/SERI.1B//AMAD/3/WAXWING/4/BECARD
EYT2011-12	6333697	THELIN#2/TUKURU//KIRITATI
EYT2011-12	6336963	FRANCOLIN #1*2/KIRITATI
EYT2011-12	6343139	KIRITATI//PRL/2*PASTOR*2/4/BOW/NKT//CBRD/3/CBRD
EYT2011-12	6334304	WAXWING/4/SNI/TRAP#1/3/KAUZ*2/TRAP//KAUZ/5/KIRITATI/4/SERI.1B*2/3/KAUZ*2/BOW//KAUZ
EYT2011-12	6343493	BL2064//SW89-5124*2/FASAN/3/TILHI*2/4/SOROCA
EYT2011-12	6332125	CHIBIA//PRLII/CM65531/3/SKAUZ/BAV92/4/MUNAL #1
EYT2011-12	6332122	CHIBIA//PRLII/CM65531/3/SKAUZ/BAV92/4/MUNAL #1
EYT2011-12	6332121	CHIBIA//PRLII/CM65531/3/SKAUZ/BAV92/4/MUNAL #1
EYT2011-12	6334893	STLN/MUNAL #1
EYT2011-12	6334895	STLN/MUNAL #1
EYT2011-12	6334411	WBLL1*2/BRAMBLING//BECARD
EYT2011-12	6335987	WHEAR*2/3/FRET2/WBLL1//TACUPETO F2001
EYT2011-12	6342398	MUNAL/HEILO
EYT2011-12	6332116	CHIBIA//PRLII/CM65531/3/SKAUZ/BAV92/4/MUNAL #1
EYT2011-12	6334206	FRANCOLIN #1/BECARD
EYT2011-12	6332385	KACHU/BECARD
EYT2011-12	6333224	PFAU/SERI.1B//AMAD/3/WAXWING/4/BECARD
EYT2011-12	6338910	WAXWING/4/SNI/TRAP#1/3/KAUZ*2/TRAP//KAUZ*2/5/HUIRIVIS #1
EYT2011-12	6338916	WAXWING/4/SNI/TRAP#1/3/KAUZ*2/TRAP//KAUZ*2/5/HUIRIVIS #1
EYT2011-12	6332131	CHIBIA//PRLII/CM65531/3/SKAUZ/BAV92/4/MUNAL #1
EYT2011-12	6333252	PFAU/SERI.1B//AMAD/3/WAXWING/4/JUCHI
EYT2011-12	6334696	WBLL4/KUKUNA//WBLL1/3/WBLL1*2/BRAMBLING
EYT2011-12	6333127	PFAU/SERI.1B//AMAD/3/WAXWING/4/WAXWING*2/TUKURU
EYT2011-12	6331066	WAXWING/4/SNI/TRAP#1/3/KAUZ*2/TRAP//KAUZ*2/5/KBIRD
EYT2011-12	6333480	PICUS/3/KAUZ*2/BOW//KAUZ/4/TILHI/5/PFAU/SERI.1B//AMAD/3/WAXWING
EYT2011-12	6333153	PFAU/SERI.1B//AMAD/3/WAXWING/5/WAXWING/4/SNI/TRAP#1/3/KAUZ*2/TRAP//KAUZ
EYT2011-12	6338961	WAXWING/4/SNI/TRAP#1/3/KAUZ*2/TRAP//KAUZ*2/5/AKURI
EYT2011-12	6333158	PFAU/SERI.1B//AMAD/3/WAXWING/5/WAXWING/4/SNI/TRAP#1/3/KAUZ*2/TRAP//KAUZ
EYT2011-12	6343196	BL2064//SW89-5124*2/FASAN/3/TILHI*2/4/HEILO
EYT2011-12	6335693	QUAIU #1/3/2*MILAN/S87230//BAV92
EYT2011-12	6337624	MILAN/S87230//BAV92*2/3/TECUE #1
EYT2011-12	6334239	FRANCOLIN #1/AKURI #1
EYT2011-12	6343061	FRNCLN/3/GUAM92//PSN/BOW/4/PAURAQ
EYT2011-12	6336445	FRANCOLIN #1/3/WBLL4/KUKUNA//WBLL1/4/MUNAL
EYT2011-12	6338984	WAXWING/4/SNI/TRAP#1/3/KAUZ*2/TRAP//KAUZ*2/5/TECUE #1
EYT2011-12	6334141	FRNCLN//WBLL1*2/BRAMBLING
EYT2011-12	6343088	CHIBIA//PRLII/CM65531/3/FISCAL/4/NG8675/CBRD/5/PRINIA/PASTOR
EYT2011-12	6327724	BABAX/LR42//BABAX*2/3/KURUKU/4/KINGBIRD #1
EYT2011-12	6337640	MILAN/S87230//BAV92*2/3/TECUE #1
EYT2011-12	6333162	PFAU/SERI.1B//AMAD/3/WAXWING/5/WAXWING/4/SNI/TRAP#1/3/KAUZ*2/TRAP//KAUZ
EYT2011-12	6418522	BABAX/LR42//BABAX*2/3/KURUKU/4/TACUPETO F2001*2/KIRITATI
EYT2011-12	6416342	WBLL4/KUKUNA//WBLL1*2/3/KINGBIRD #1
EYT2011-12	6418521	BABAX/LR42//BABAX*2/3/KURUKU/4/FRET2*2/BRAMBLING
EYT2011-12	6418526	BABAX/LR42//BABAX*2/3/KURUKU/4/TACUPETO F2001*2/KIRITATI
EYT2011-12	6418530	QUAIU #3//TACUPETO F2001*2/KIRITATI
EYT2011-12	6416598	SHORTENED SR26 TRANSLOCATION//WBLL1*2/BRAMBLING/3/VILLA JUAREZ F2009
EYT2011-12	6418533	PRINIA/PASTOR//WBLL1*2/BRAMBLING
EYT2011-12	6418531	QUAIU #3//TACUPETO F2001*2/KIRITATI
EYT2011-12	6418536	GRACK/PVN
EYT2011-12	6417650	PFAU/SERI.1B//AMAD/3/WAXWING/4/BECARD
EYT2011-12	6417653	PFAU/SERI.1B//AMAD/3/WAXWING/4/BECARD
EYT2011-12	6417651	PFAU/SERI.1B//AMAD/3/WAXWING/4/BECARD
EYT2011-12	6417658	MUU/AKURI #1
EYT2011-12	6415456	BECARD/CHYAK
EYT2011-12	6417875	WBLL1*2/BRAMBLING//VORB/FISCAL/3/BECARD
EYT2011-12	6417876	WBLL1*2/BRAMBLING//VORB/FISCAL/3/BECARD
EYT2011-12	6416548	SHORTENED SR26 TRANSLOCATION/4/ATTILA/3*BCN//BAV92/3/PASTOR/5/MUNAL
EYT2011-12	6417885	WBLL1*2/CHAPIO/6/CNDO/R143//ENTE/MEXI75/3/AE.SQ/4/2*OCI/5/2*CIRCUS/7/WBLL1*2/BRAMBLING
EYT2011-12	6417883	WBLL1*2/4/SNI/TRAP#1/3/KAUZ*2/TRAP//KAUZ/5/WAXWING/4/SNI/TRAP#1/3/KAUZ*2/TRAP//KAUZ/6/QUAIU #3
EYT2011-12	6416314	WBLL1/3/STAR//KAUZ/STAR/4/BAV92/RAYON/5/KIRITATI/6/BECARD
EYT2011-12	6415468	WHEAR/KUKUNA/3/C80.1/3*BATAVIA//2*WBLL1/4/QUAIU #2
EYT2011-12	6417648	PFAU/SERI.1B//AMAD/3/WAXWING/5/WAXWING/4/SNI/TRAP#1/3/KAUZ*2/TRAP//KAUZ
EYT2011-12	6417649	PFAU/SERI.1B//AMAD/3/WAXWING/4/WBLL1*2/BRAMBLING
EYT2011-12	6417851	THELIN/3/2*BABAX/LR42//BABAX/4/2*KIRITATI/WBLL1
EYT2011-12	6417853	THELIN/3/BABAX/LR42//BABAX/4/BABAX/LR42//BABAX/5/TOBA97/PASTOR/6/KIRITATI//PRL/2*PASTOR
EYT2011-12	6417611	KIRITATI//ATTILA*2/PASTOR/3/AKURI
EYT2011-12	6417612	KIRITATI//ATTILA*2/PASTOR/3/AKURI
EYT2011-12	6416528	ND643/2*TRCH//BECARD/3/BECARD
EYT2011-12	6417857	FRET2*2/BRAMBLING/3/FRET2/WBLL1//TACUPETO F2001/4/WBLL1*2/BRAMBLING
EYT2011-12	6417860	FRET2*2/BRAMBLING//MESIA/3/BECARD
EYT2011-12	6416530	ND643/2*TRCH//BECARD/3/BECARD
EYT2011-12	6416533	ND643/2*TRCH//BECARD/3/BECARD
EYT2011-12	6417622	KIRITATI/WBLL1//FRNCLN
EYT2011-12	6415893	PFAU/SERI.1B//AMAD/3/WAXWING*2/4/BECARD
EYT2011-12	6416509	ND643/2*WBLL1/5/2*WAXWING/4/SNI/TRAP#1/3/KAUZ*2/TRAP//KAUZ
EYT2011-12	6415411	PFAU/SERI.1B//AMAD/3/WAXWING/4/CHYAK1
EYT2011-12	6415898	PFAU/SERI.1B//AMAD/3/WAXWING*2/4/KIRITATI
EYT2011-12	6416507	ND643/2*WBLL1/5/2*WAXWING/4/SNI/TRAP#1/3/KAUZ*2/TRAP//KAUZ
EYT2011-12	6417838	MISR 1/KACHU/5/KIRITATI/4/SERI.1B*2/3/KAUZ*2/BOW//KAUZ
EYT2011-12	6415661	BABAX/LR42//BABAX*2/3/KURUKU/4/KINGBIRD #1/5/QUAIU #2
EYT2011-12	6415662	QUAIU #1//TOBA97/PASTOR/3/QUAIU
EYT2011-12	6415420	SAAR/WBLL1//CHYAK
EYT2011-12	6417608	KIRITATI//ATTILA*2/PASTOR/3/PVN
EYT2011-12	6415664	QUAIU #1//TOBA97/PASTOR/3/QUAIU
EYT2011-12	6417603	KAUZ/PASTOR//PBW343/3/MUNAL
EYT2011-12	6417848	BABAX/LR42//BABAX*2/3/KUKUNA/4/2*MUNAL #1
EYT2011-12	6415426	MUNAL/3/HUW234+LR34/PRINIA//PFAU/WEAVER
EYT2011-12	6417849	THELIN/3/2*BABAX/LR42//BABAX/4/2*KIRITATI/WBLL1
EYT2011-12	6415630	ATTILA/3*BCN*2//BAV92/3/KIRITATI/WBLL1/4/DANPHE
EYT2011-12	6417819	SERI.1B*2/3/KAUZ*2/BOW//KAUZ/4/FRANCOLIN #1/5/MUNAL
EYT2011-12	6417817	SERI.1B*2/3/KAUZ*2/BOW//KAUZ/4/FRANCOLIN #1/5/MUNAL
EYT2011-12	6415637	ATTILA/3*BCN//BAV92/3/PASTOR/4/TACUPETO F2001*2/BRAMBLING/5/PAURAQ
EYT2011-12	6415641	ATTILA/3*BCN//BAV92/3/PASTOR/4/TACUPETO F2001*2/BRAMBLING/5/PAURAQ
EYT2011-12	6415882	KAUZ/PASTOR//PBW343/3/KIRITATI/4/FRNCLN
EYT2011-12	6415640	ATTILA/3*BCN//BAV92/3/PASTOR/4/TACUPETO F2001*2/BRAMBLING/5/PAURAQ
EYT2011-12	6417822	VORB/FISCAL//WBLL1*2/KURUKU/3/QUAIU
EYT2011-12	6415642	ATTILA/3*BCN//BAV92/3/PASTOR/4/TACUPETO F2001*2/BRAMBLING/5/PAURAQ
EYT2011-12	6417823	KAUZ/PASTOR//PBW343*2/3/MUNAL #1
EYT2011-12	6415645	ATTILA/3*BCN//BAV92/3/PASTOR/4/KIRITATI//PRL/2*PASTOR/5/KIRITATI//2*ATTILA*2/PASTOR
EYT2011-12	6416948	KAUZ*2/MNV//KAUZ/3/MILAN/4/BAV92/5/DANPHE #1
EYT2011-12	6416942	TACUPETO F2001*2/KIRITATI//VILLA JUAREZ F2009
EYT2011-12	6415851	KACHU/PVN//KACHU
EYT2011-12	6415858	KACHU/BECARD//WBLL1*2/BRAMBLING
EYT2011-12	6415629	ATTILA/3*BCN*2//BAV92/3/KIRITATI/WBLL1/4/DANPHE
EYT2011-12	6416954	KACHU/KINDE
EYT2011-12	6416951	KACHU/KINDE
EYT2011-12	6415627	ATTILA/3*BCN*2//BAV92/3/KIRITATI/WBLL1/4/DANPHE
EYT2011-12	6415837	KAUZ*2/MNV//KAUZ/3/MILAN/4/BAV92*2/5/KBIRD
EYT2011-12	6416926	FRET2/TUKURU//FRET2/3/TACUPETO F2001*2/KIRITATI
EYT2011-12	6415832	KAUZ*2/MNV//KAUZ/3/MILAN/4/BAV92/5/AKURI/6/MILAN/S87230//BAV92
EYT2011-12	6415849	KACHU/PVN//KACHU
EYT2011-12	6415842	KAUZ*2/MNV//KAUZ/3/MILAN/4/BAV92*2/5/KBIRD
EYT2011-12	6416909	FRET2*2/4/SNI/TRAP#1/3/KAUZ*2/TRAP//KAUZ/5/KIRITATI/2*TRCH
EYT2011-12	6356511	KACHU/3/T.DICOCCON PI94624/AE.SQUARROSA (409)//BCN/4/2*KACHU
EYT2011-12	6415827	KAUZ*2/MNV//KAUZ/3/MILAN/4/BAV92/5/AKURI/6/MILAN/S87230//BAV92
EYT2011-12	6415823	TACUPETO F2001*2/KIRITATI/5/KIRITATI/4/SERI.1B*2/3/KAUZ*2/BOW//KAUZ/6/TACUPETO F2001*2/KIRITATI
EYT2011-12	6415825	KAUZ*2/MNV//KAUZ/3/MILAN/4/BAV92*2/5/KIRITATI
EYT2011-12	6418079	TOBA97/PASTOR*2//AKURI
EYT2011-12	6354149	NAC/TH.AC//3*PVN/3/MIRLO/BUC/4/2*PASTOR/5/T.DICOCCON PI94624/AE.SQUARROSA (409)//BCN/6/WBLL4//BABAX.1B.1B*2/PRL/3/PASTOR
EYT2011-12	6356535	PFAU/WEAVER//BRAMBLING/3/T.SPELTA PI348530/4/2*PFAU/WEAVER*2//BRAMBLING
EYT2011-12	6416091	MILAN/S87230//BAV92/3/AKURI #1/4/MILAN/S87230//BAV92
EYT2011-12	6356309	WBLL1*2/KKTS*2/3/T.DICOCCON PI272533/AE.SQUARROSA (458)//CMH81A.1261/VEE#10/4/WBLL1*2/KKTS
EYT2011-12	6416061	PCAFLR/KINGBIRD #1//KIRITATI/2*TRCH
EYT2011-12	6356357	WBLL1*2/VIVITSI/3/T.DICOCCON PI94624/AE.SQUARROSA (409)//BCN/4/WBLL1*2/VIVITSI/5/WBLL1*2/BRAMBLING
EYT2011-12	6418011	QUAIU #1*2/JUCHI
EYT2011-12	6416285	WBLL1*2/KURUKU*2/4/PFAU/SERI.1B//AMAD/3/WAXWING
EYT2011-12	6416058	PCAFLR/KINGBIRD #1//KIRITATI/2*TRCH
EYT2011-12	6416291	WBLL1*2/KURUKU*2/4/PFAU/SERI.1B//AMAD/3/WAXWING
EYT2011-12	6417592	KACHU//KIRITATI/WBLL1
EYT2011-12	6417590	KACHU//WBLL1*2/KUKUNA
EYT2011-12	6418680	FRET2/KUKUNA//FRET2/3/HEILO
EYT2011-12	6416277	WBLL1*2/KUKUNA//KIRITATI/3/WBLL1*2/KUKUNA
EYT2011-12	6417572	KACHU//WBLL1*2/BRAMBLING
EYT2011-12	6416482	ND643/2*TRCH/3/MILAN/S87230//BAV92/4/PFAU/SERI.1B//AMAD/3/WAXWING
EYT2011-12	6417571	KACHU//WBLL1*2/BRAMBLING
EYT2011-12	6418663	FRNCLN//BR23/EMB27/3/FRNCLN
EYT2011-12	6416007	FRANCOLIN #1/AKURI #1//FRNCLN
EYT2011-12	6417583	KACHU/KIRITATI
EYT2011-12	6416011	FRANCOLIN #1/AKURI #1//FRNCLN
EYT2011-12	6416014	WAXWING/4/SNI/TRAP#1/3/KAUZ*2/TRAP//KAUZ*2/5/KBIRD
EYT2011-12	6417588	KACHU//WBLL1*2/KUKUNA
EYT2011-12	6416012	FRANCOLIN #1/AKURI #1//FRNCLN
EYT2011-12	6416019	WAXWING/4/SNI/TRAP#1/3/KAUZ*2/TRAP//KAUZ*2/5/KBIRD
EYT2011-12	6417589	KACHU//WBLL1*2/KUKUNA
EYT2011-12	6418640	FRET2/KUKUNA//FRET2/3/HEILO/4/BABAX/LR42//BABAX*2/3/KURUKU
EYT2011-12	6417790	INIA CHURRINCHE/KIRITATI
EYT2011-12	6417794	ITP40/AKURI
EYT2011-12	6418642	KAUZ*2/MNV//KAUZ/3/MILAN/4/BAV92/5/HEILO/6/CHIBIA//PRLII/CM65531/3/SKAUZ/BAV92
EYT2011-12	6418641	FRET2/KUKUNA//FRET2/3/HEILO/4/BABAX/LR42//BABAX*2/3/KURUKU
EYT2011-12	6416231	WBLL1*2/KIRITATI//FRNCLN/3/BECARD
EYT2011-12	6416477	ND643/2*WBLL1/3/KIRITATI//PRL/2*PASTOR/4/KIRITATI//PBW65/2*SERI.1B
EYT2011-12	6416236	WBLL1*2/KIRITATI//FRNCLN/3/BECARD
EYT2011-12	6417770	WBLL1*2/KURUKU/4/PFAU/SERI.1B//AMAD/3/WAXWING
EYT2011-12	6416201	WBLL1*2/CHAPIO//KBIRD/3/WBLL1*2/KUKUNA
EYT2011-12	6417775	WBLL1/3/STAR//KAUZ/STAR/4/BAV92/RAYON/5/KINGBIRD #1
EYT2011-12	6417778	WBLL1/KUKUNA//TACUPETO F2001/3/KIRITATI
EYT2011-12	6418625	BABAX/LR42//BABAX*2/3/TUKURU*2/4/HEILO
EYT2011-12	6418624	BABAX/LR42//BABAX*2/3/TUKURU*2/4/HEILO
EYT2011-12	6416207	BECARD/AKURI #1//BECARD
EYT2011-12	6417785	WBLL4/KUKUNA//WBLL1/3/KINGBIRD #1
EYT2011-12	6417784	WBLL4/KUKUNA//WBLL1/3/KINGBIRD #1
EYT2011-12	6416218	WBLL1*2/KIRITATI//KBIRD/3/BECARD
EYT2011-12	6415571	PBW65/2*PASTOR*2//MUU
EYT2011-12	6418600	BABAX/LR42//BABAX*2/3/KUKUNA/4/CROSBILL #1/5/BECARD
EYT2011-12	6417753	WBLL1*2/BRAMBLING/4/PFAU/SERI.1B//AMAD/3/WAXWING
EYT2011-12	6415575	PBW65/2*PASTOR*2//MUU
EYT2011-12	6415584	PBW65/2*PASTOR//BECARD/3/BECARD
EYT2011-12	6417767	WBLL1*2/KURUKU/4/PFAU/SERI.1B//AMAD/3/WAXWING
EYT2011-12	6418614	ATTILA/3*BCN*2//BAV92/3/HEILO/4/CHIBIA//PRLII/CM65531/3/SKAUZ/BAV92
EYT2011-12	6417765	WBLL1*2/KURUKU/4/PFAU/SERI.1B//AMAD/3/WAXWING
EYT2011-12	6418612	ATTILA/3*BCN*2//BAV92/3/HEILO/4/CHIBIA//PRLII/CM65531/3/SKAUZ/BAV92
EYT2011-12	6415552	PBW65/2*PASTOR//TACUPETO F2001*2/BRAMBLING/3/TACUPETO F2001*2/BRAMBLING
EYT2011-12	6417971	KAUZ/PASTOR//PBW343*2/3/KBIRD
EYT2011-12	6415555	PBW65/2*PASTOR//TACUPETO F2001*2/BRAMBLING/3/TACUPETO F2001*2/BRAMBLING
EYT2011-12	6415557	PBW65/2*PASTOR/3/KIRITATI//ATTILA*2/PASTOR/4/DANPHE #1
EYT2011-12	6417733	WAXWING/4/SNI/TRAP#1/3/KAUZ*2/TRAP//KAUZ/5/KIRITATI//ATTILA*2/PASTOR
EYT2011-12	6415558	PBW65/2*PASTOR/3/KIRITATI//ATTILA*2/PASTOR/4/DANPHE #1
EYT2011-12	6415560	PBW65/2*PASTOR/3/KIRITATI//PBW65/2*SERI.1B/4/DANPHE #1
EYT2011-12	6415563	PBW65/2*PASTOR/3/KIRITATI//PBW65/2*SERI.1B/4/DANPHE #1
EYT2011-12	6415568	PBW65/2*PASTOR/4/PFAU/SERI.1B//AMAD/3/WAXWING/5/CHYAK
EYT2011-12	6417985	MILAN/S87230//BAV92*2/3/JUCHI
EYT2011-12	6416861	KINGBIRD #1//WBLL1*2/VIVITSI/3/WBLL1*2/CHAPIO
EYT2011-12	6417950	PFAU/SERI.1B//AMAD/3/WAXWING*2/4/HUIRIVIS #1
EYT2011-12	6417713	TUKURU//BAV92/RAYON/3/MUNAL #1
EYT2011-12	6416867	WAXWING/4/SNI/TRAP#1/3/KAUZ*2/TRAP//KAUZ*2/5/KBIRD
EYT2011-12	6417960	VORB/FISCAL*2//KINGBIRD #1
EYT2011-12	6415546	KRL 19/QUAIU #1
EYT2011-12	6417722	VORB/FISCAL//KIRITATI
EYT2011-12	6416878	WBLL1*2/BRAMBLING*2//YANAC
EYT2011-12	6415750	FRET2*2/BRAMBLING//MUNAL #1/3/PAURAQ
EYT2011-12	6415519	PBW502/4/WHEAR/KUKUNA/3/C80.1/3*BATAVIA//2*WBLL1
EYT2011-12	6417930	FRANCOLIN #1*2/MUU
EYT2011-12	6415761	FRET2*2/BRAMBLING//BECARD/3/WBLL1*2/BRAMBLING
EYT2011-12	6417941	SERI.1B*2/3/KAUZ*2/BOW//KAUZ*2/4/AKURI
EYT2011-12	6417942	SERI.1B*2/3/KAUZ*2/BOW//KAUZ*2/4/KINGBIRD #1
EYT2011-12	6354772	CROC_1/AE.SQUARROSA (210)//PBW343*2/KHVAKI/3/PBW343*2/KUKUNA
EYT2011-12	6415730	CNO79//PF70354/MUS/3/PASTOR/4/BAV92/5/KIRITATI//ATTILA*2/PASTOR/6/CHYAK
EYT2011-12	6415972	GRACK/TECUE #1//FRNCLN
EYT2011-12	6417929	FRANCOLIN #1*2/MUU
EYT2011-12	6417928	FRANCOLIN #1*2/KIRITATI
EYT2011-12	6416837	MILAN/S87230//BAV92*2/3/KINGBIRD #1
EYT2011-12	6415503	GW322/4/WHEAR/KUKUNA/3/C80.1/3*BATAVIA//2*WBLL1
EYT2011-12	6416805	ONIX/KBIRD
EYT2011-12	6416806	ONIX/KBIRD
EYT2011-12	6415953	THELIN//2*ATTILA*2/PASTOR/3/KINGBIRD #1/4/THELIN/WAXWING//ATTILA*2/PASTOR
EYT2011-12	6415726	CHIBIA//PRLII/CM65531/3/SW89.5181/KAUZ/4/KIRITATI//ATTILA*2/PASTOR/5/PFAU/WEAVER*2//TRANSFER#12,P88.272.2
EYT2011-12	6415968	GRACK/TECUE #1//FRNCLN
EYT2011-12	6415939	PRINIA/PASTOR//KIRITATI/3/PRL/2*PASTOR
EYT2011-12	6415934	MUU/3/KIRITATI//ATTILA*2/PASTOR/4/MUU
EYT2011-12	6354227	REH/HARE//2*BCN/3/CROC_1/AE.SQUARROSA (213)//PGO/4/HUITES/5/T.DICOCCON PI94624/AE.SQUARROSA (409)//BCN/6/REH/HARE//2*BCN/3/CROC_1/AE.SQUARROSA (213)//PGO/4/HUITES
EYT2011-12	6354223	REH/HARE//2*BCN/3/CROC_1/AE.SQUARROSA (213)//PGO/4/HUITES/5/T.DICOCCON PI94624/AE.SQUARROSA (409)//BCN/6/REH/HARE//2*BCN/3/CROC_1/AE.SQUARROSA (213)//PGO/4/HUITES
EYT2011-12	6354224	REH/HARE//2*BCN/3/CROC_1/AE.SQUARROSA (213)//PGO/4/HUITES/5/T.DICOCCON PI94624/AE.SQUARROSA (409)//BCN/6/REH/HARE//2*BCN/3/CROC_1/AE.SQUARROSA (213)//PGO/4/HUITES
EYT2011-12	6354220	REH/HARE//2*BCN/3/CROC_1/AE.SQUARROSA (213)//PGO/4/HUITES/5/T.DICOCCON PI94624/AE.SQUARROSA (409)//BCN/6/REH/HARE//2*BCN/3/CROC_1/AE.SQUARROSA (213)//PGO/4/HUITES
EYT2011-12	6354221	REH/HARE//2*BCN/3/CROC_1/AE.SQUARROSA (213)//PGO/4/HUITES/5/T.DICOCCON PI94624/AE.SQUARROSA (409)//BCN/6/REH/HARE//2*BCN/3/CROC_1/AE.SQUARROSA (213)//PGO/4/HUITES
EYT2011-12	6415915	PFAU/SERI.1B//AMAD/3/WAXWING*2/4/TECUE #1
EYT2011-12	6415910	PFAU/SERI.1B//AMAD/3/WAXWING*2/4/TECUE #1
EYT2011-12	6415913	PFAU/SERI.1B//AMAD/3/WAXWING*2/4/TECUE #1
EYT2011-12	6415912	PFAU/SERI.1B//AMAD/3/WAXWING*2/4/TECUE #1
EYT2011-12	6415924	PFAU/SERI.1B//AMAD/3/WAXWING*2/4/TECUE #1
EYT2011-12	6415906	PFAU/SERI.1B//AMAD/3/WAXWING*2/4/TECUE #1
EYT2011-12	6415905	PFAU/SERI.1B//AMAD/3/WAXWING*2/4/TECUE #1
EYT2011-12	6415909	PFAU/SERI.1B//AMAD/3/WAXWING*2/4/TECUE #1
EYT2011-12	6356447	REH/HARE//2*BCN/3/CROC_1/AE.SQUARROSA (213)//PGO/4/HUITES/5/T.DICOCCON PI94624/AE.SQUARROSA (409)//BCN/6/REH/HARE//2*BCN/3/CROC_1/AE.SQUARROSA (213)//PGO/4/HUITES/7/MILAN/S87230//BAV92
EYT2011-12	6356440	REH/HARE//2*BCN/3/CROC_1/AE.SQUARROSA (213)//PGO/4/HUITES/5/T.DICOCCON PI94624/AE.SQUARROSA (409)//BCN/6/REH/HARE//2*BCN/3/CROC_1/AE.SQUARROSA (213)//PGO/4/HUITES/7/MILAN/S87230//BAV92
EYT2011-12	6356425	REH/HARE//2*BCN/3/CROC_1/AE.SQUARROSA (213)//PGO/4/HUITES/5/T.DICOCCON PI94624/AE.SQUARROSA (409)//BCN/6/REH/HARE//2*BCN/3/CROC_1/AE.SQUARROSA (213)//PGO/4/HUITES/7/MILAN/S87230//BAV92
EYT2011-12	6416186	MUNAL/3/KIRITATI//PRL/2*PASTOR/4/MUNAL
EYT2011-12	6418120	HUIRIVIS #1/MUU//WBLL1*2/BRAMBLING
EYT2011-12	6416188	MUNAL/3/KIRITATI//PRL/2*PASTOR/4/MUNAL
EYT2011-12	6418124	HUIRIVIS #1/MUU//WBLL1*2/BRAMBLING
EYT2011-12	6418133	KIRITATI/AKURI/3/KIRITATI//PRL/2*PASTOR
EYT2011-12	6356484	KACHU/3/T.DICOCCON PI94624/AE.SQUARROSA (409)//BCN/4/2*KACHU
EYT2011-12	6356486	KACHU/3/T.DICOCCON PI94624/AE.SQUARROSA (409)//BCN/4/2*KACHU
EYT2011-12	6416163	MUNAL*2//WAXWING*2/TUKURU
EYT2011-12	6416168	MUNAL*2//WAXWING*2/TUKURU
EYT2011-12	6416169	MUNAL*2//WAXWING*2/TUKURU
EYT2011-12	6416161	MUNAL*2//WAXWING*2/TUKURU
EYT2011-12	6356457	REH/HARE//2*BCN/3/CROC_1/AE.SQUARROSA (213)//PGO/4/HUITES/5/T.DICOCCON PI94624/AE.SQUARROSA (409)//BCN/6/REH/HARE//2*BCN/3/CROC_1/AE.SQUARROSA (213)//PGO/4/HUITES/7/MILAN/S87230//BAV92
EYT2011-12	6418596	BABAX/LR42//BABAX*2/3/KUKUNA/4/BACEU #1/5/BECARD
EYT2011-12	6416174	MUNAL*2//WBLL1*2/BRAMBLING
EYT2011-12	6418115	HUIRIVIS #1/MUU/3/KIRITATI//PBW65/2*SERI.1B
EYT2011-12	6418598	BABAX/LR42//BABAX*2/3/KUKUNA/4/CROSBILL #1/5/BECARD
EYT2011-12	6418597	BABAX/LR42//BABAX*2/3/KUKUNA/4/CROSBILL #1/5/BECARD
EYT2011-12	6356227	PICUS/3/KAUZ*2/BOW//KAUZ/4/KKTS/5/T.SPELTA PI348530/6/2*FRANCOLIN #1
EYT2011-12	6356226	PICUS/3/KAUZ*2/BOW//KAUZ/4/KKTS/5/T.SPELTA PI348530/6/2*FRANCOLIN #1
EYT2011-12	6356221	PICUS/3/KAUZ*2/BOW//KAUZ/4/KKTS/5/T.SPELTA PI348530/6/2*FRANCOLIN #1
EYT2011-12	6356222	PICUS/3/KAUZ*2/BOW//KAUZ/4/KKTS/5/T.SPELTA PI348530/6/2*FRANCOLIN #1
EYT2011-12	6418562	TUKURU//BAV92/RAYON/3/WBLL1*2/BRAMBLING/4/WBLL1*2/BRAMBLING
EYT2011-12	6416382	ND643/2*WBLL1//ATTILA*2/PBW65/3/MUNAL
EYT2011-12	6418561	VORB/FISCAL//WBLL1*2/KURUKU/3/QUAIU
EYT2011-12	6416158	PAURAQ/KBIRD/5/WAXWING/4/SNI/TRAP#1/3/KAUZ*2/TRAP//KAUZ
EYT2011-12	6418541	WBLL1*2/BRAMBLING/4/PFAU/SERI.1B//AMAD/3/WAXWING
EYT2011-12	6356491	KACHU/3/T.DICOCCON PI94624/AE.SQUARROSA (409)//BCN/4/2*KACHU
EYT2011-12	6418543	WBLL4/KUKUNA//WBLL1/3/KINGBIRD #1
EYT2011-12	6418542	WBLL1*2/KKTS//KIRITATI
EYT2011-12	6418546	WBLL4/KUKUNA//WBLL1/3/KINGBIRD #1
EYT2011-12	6418558	GRACK//WBLL1*2/BRAMBLING/3/WBLL1*2/BRAMBLING
EYT2011-12	6417434	FRANCOLIN #1/BECARD//FRNCLN
EYT2011-12	6415013	FRNCLN/4/WHEAR/KUKUNA/3/C80.1/3*BATAVIA//2*WBLL1
EYT2011-12	6417436	FRANCOLIN #1/BECARD//FRNCLN
EYT2011-12	6415017	FRNCLN/4/WHEAR/KUKUNA/3/C80.1/3*BATAVIA//2*WBLL1
EYT2011-12	6417202	MUNAL/3/HUW234+LR34/PRINIA//PFAU/WEAVER
EYT2011-12	6417209	WBLL1*2/BRAMBLING//CHYAK
EYT2011-12	6335277	MILAN/S87230//BAV92/3/WBLL1*2/BRAMBLING/4/WBLL1*2/BRAMBLING
EYT2011-12	6418501	PBW65/2*PASTOR/4/PFAU/SERI.1B//AMAD/3/WAXWING/5/CHYAK
EYT2011-12	6417412	PAURAQ/KBIRD/5/WAXWING/4/SNI/TRAP#1/3/KAUZ*2/TRAP//KAUZ
EYT2011-12	6415234	KISKADEE #1/CHYAK
EYT2011-12	6417415	MUNAL*2//WBLL1*2/BRAMBLING
EYT2011-12	6418504	KACHU//WBLL1*2/KUKUNA/3/BRBT1*2/KIRITATI
EYT2011-12	6418502	PBW65/2*PASTOR/4/PFAU/SERI.1B//AMAD/3/WAXWING/5/CHYAK
EYT2011-12	6418507	KACHU//WBLL1*2/KUKUNA/3/BRBT1*2/KIRITATI
EYT2011-12	6415240	KISKADEE #1//KIRITATI/2*TRCH
EYT2011-12	6418512	KIRITATI//ATTILA*2/PASTOR/3/PVN/4/KIRITATI//2*ATTILA*2/PASTOR
EYT2011-12	6418510	KACHU//WBLL1*2/KUKUNA/3/BRBT1*2/KIRITATI
EYT2011-12	6415003	FRNCLN/4/WHEAR/KUKUNA/3/C80.1/3*BATAVIA//2*WBLL1
EYT2011-12	6418519	BABAX/LR42//BABAX*2/3/KURUKU/5/FRET2*2/4/SNI/TRAP#1/3/KAUZ*2/TRAP//KAUZ
EYT2011-12	6415008	FRNCLN/4/WHEAR/KUKUNA/3/C80.1/3*BATAVIA//2*WBLL1
EYT2011-12	6415211	WBLL1/KUKUNA//TACUPETO F2001/4/WHEAR/KUKUNA/3/C80.1/3*BATAVIA//2*WBLL1
EYT2011-12	6415216	WBLL1/KUKUNA//TACUPETO F2001/3/QUAIU #2
EYT2011-12	6415221	WBLL4/KUKUNA//WBLL1/3/KINGBIRD #1
EYT2011-12	6335280	MILAN/S87230//BAV92/3/WBLL1*2/BRAMBLING/4/WBLL1*2/BRAMBLING
EYT2011-12	6417408	TUKURU//BAV92/RAYON*2/3/KIRITATI
EYT2011-12	6414596	FRET2/KUKUNA//FRET2/3/HEILO/4/BABAX/LR42//BABAX*2/3/KURUKU
EYT2011-12	6415204	WBLL1/KUKUNA//TACUPETO F2001/4/WHEAR/KUKUNA/3/C80.1/3*BATAVIA//2*WBLL1
EYT2011-12	6415207	WBLL1/KUKUNA//TACUPETO F2001/4/WHEAR/KUKUNA/3/C80.1/3*BATAVIA//2*WBLL1
EYT2011-12	6415206	WBLL1/KUKUNA//TACUPETO F2001/4/WHEAR/KUKUNA/3/C80.1/3*BATAVIA//2*WBLL1
EYT2011-12	6342855	WBLL1*2/BRAMBLING/5/WBLL1*2/4/SNI/TRAP#1/3/KAUZ*2/TRAP//KAUZ/6/WBLL1*2/BRAMBLING
EYT2011-12	6342854	WBLL1*2/BRAMBLING/5/WBLL1*2/4/SNI/TRAP#1/3/KAUZ*2/TRAP//KAUZ/6/WBLL1*2/BRAMBLING
EYT2011-12	6342851	WBLL1*2/BRAMBLING/5/WBLL1*2/4/SNI/TRAP#1/3/KAUZ*2/TRAP//KAUZ/6/WBLL1*2/BRAMBLING
EYT2011-12	6416998	MUU/KBIRD
EYT2011-12	6416996	MUU/KBIRD
EYT2011-12	6416999	MUU/KBIRD
EYT2011-12	6342402	MUNAL/HEILO
EYT2011-12	6414783	KAUZ*2/MNV//KAUZ/3/MILAN/4/BAV92/5/DANPHE #1
EYT2011-12	6414789	KAUZ*2/MNV//KAUZ/3/MILAN/4/BAV92/5/CHYAK
EYT2011-12	6414788	KAUZ*2/MNV//KAUZ/3/MILAN/4/BAV92/5/CHYAK
EYT2011-12	6414797	KACHU/PAURAQ
EYT2011-12	6414558	WBLL1*2/BRAMBLING/3/OR791432/VEE#3.2//MILAN
EYT2011-12	6414774	FRET2/KUKUNA//FRET2/3/FRNCLN
EYT2011-12	6414778	FRET2/KUKUNA//FRET2/3/FRNCLN
EYT2011-12	6416955	KACHU/KINDE
EYT2011-12	6416956	KACHU/KINDE
EYT2011-12	6414748	CROSBILL #1/FRNCLN
EYT2011-12	6414982	MUNAL/FRNCLN
EYT2011-12	6414745	QUAIU/BECARD
EYT2011-12	6414747	BRBT1*2/KIRITATI//FRNCLN
EYT2011-12	6414752	CROSBILL #1/VILLA JUAREZ F2009
EYT2011-12	6414996	GRACK/CHYAK
EYT2011-12	6414755	CROC_1/AE.SQUARROSA (205)//BORL95/3/PRL/SARA//TSI/VEE#5/4/FRET2/5/KINDE
EYT2011-12	6414966	PAURAQ/VILLA JUAREZ F2009
EYT2011-12	6414734	ATTILA*2/PBW65//DANPHE
EYT2011-12	6343458	PFAU/MILAN//FISCAL/3/VORB/4/MILAN/S87230//BAV92
EYT2011-12	6414707	SERI.1B*2/3/KAUZ*2/BOW//KAUZ/4/MUNAL
EYT2011-12	6414709	PRL/2*PASTOR//DANPHE #1
EYT2011-12	6414941	TUKURU//BAV92/RAYON/3/FRNCLN
EYT2011-12	6414943	TUKURU//BAV92/RAYON/3/FRNCLN
EYT2011-12	6414942	TUKURU//BAV92/RAYON/3/FRNCLN
EYT2011-12	6414944	TUKURU//BAV92/RAYON/3/FRNCLN
EYT2011-12	6414957	PAURAQ/FRNCLN
EYT2011-12	6414959	PAURAQ/VILLA JUAREZ F2009
EYT2011-12	6339181	INQALAB 91*2/KUKUNA*2//JUCHI
EYT2011-12	6414711	PRL/2*PASTOR//DANPHE #1
EYT2011-12	6417199	SAAR/WBLL1//QUAIU
EYT2011-12	6417197	SAAR/WBLL1//QUAIU
EYT2011-12	6418280	BABAX/LR42//BABAX*2/3/TUKURU*2/4/CBRD
EYT2011-12	6418299	BABAX/LR42//BABAX*2/4/SNI/TRAP#1/3/KAUZ*2/TRAP//KAUZ/5/CBRD/6/CHIBIA//PRLII/CM65531/3/SW89.5181/KAUZ
EYT2011-12	6343460	PFAU/MILAN//FISCAL/3/VORB/4/MILAN/S87230//BAV92
EYT2011-12	6418292	BABAX/LR42//BABAX*2/3/TUKURU*2/4/HEILO
EYT2011-12	6414938	TUKURU//BAV92/RAYON/3/FRNCLN
EYT2011-12	6414937	TUKURU//BAV92/RAYON/3/FRNCLN
EYT2011-12	6417177	CHYAK1/GRACK
EYT2011-12	6417174	CHYAK1/VILLA JUAREZ F2009
EYT2011-12	6418264	BECARD/3/PASTOR//MUNIA/ALTAR 84
EYT2011-12	6418263	BECARD/3/PASTOR//MUNIA/ALTAR 84
EYT2011-12	6417172	CHYAK1/VILLA JUAREZ F2009
EYT2011-12	6418262	BECARD/3/PASTOR//MUNIA/ALTAR 84
EYT2011-12	6418261	BECARD/3/PASTOR//MUNIA/ALTAR 84
EYT2011-12	6418260	TAM200/PASTOR//TOBA97/3/HEILO
EYT2011-12	6418279	BABAX/LR42//BABAX*2/3/TUKURU*2/4/CBRD
EYT2011-12	6418272	ATTILA/3*BCN*2//BAV92/3/HEILO/4/CHIBIA//PRLII/CM65531/3/SKAUZ/BAV92
EYT2011-12	6342154	FRET2/KUKUNA//FRET2/3/HEILO
EYT2011-12	6417158	WHEAR/KUKUNA/3/C80.1/3*BATAVIA//2*WBLL1/4/QUAIU
EYT2011-12	6417159	WHEAR/KUKUNA/3/C80.1/3*BATAVIA//2*WBLL1/4/QUAIU
EYT2011-12	6417157	WHEAR/KUKUNA/3/C80.1/3*BATAVIA//2*WBLL1/4/QUAIU
EYT2011-12	6417399	SITE/MO//PASTOR/3/TILHI/4/KBIRD/5/FRNCLN
EYT2011-12	6418482	ONIX/KBIRD
EYT2011-12	6417393	SITE/MO//PASTOR/3/TILHI/4/MUNAL #1/5/MUNAL
EYT2011-12	6418480	WBLL1*2/BRAMBLING//KINGBIRD #1
EYT2011-12	6418494	SAAR/3/PFAU/SERI.1B//AMAD/4/FRNCLN
EYT2011-12	6418259	PFAU/WEAVER*2//TRANSFER#12,P88.272.2/3/VORB
EYT2011-12	6417161	WHEAR/KUKUNA/3/C80.1/3*BATAVIA//2*WBLL1/4/QUAIU
EYT2011-12	6418493	SAAR/3/PFAU/SERI.1B//AMAD/4/FRNCLN
EYT2011-12	6418492	BABAX/LR42//BABAX*2/3/KURUKU/4/WBLL1*2/BRAMBLING
EYT2011-12	6417160	WHEAR/KUKUNA/3/C80.1/3*BATAVIA//2*WBLL1/4/QUAIU
EYT2011-12	6418222	QUAIU #3*2//SHA5/WEAVER
EYT2011-12	6415195	WBLL1*2/KURUKU/3/WHEAR/VIVITSI//WHEAR
EYT2011-12	6415194	WBLL1*2/KURUKU/3/WHEAR/VIVITSI//WHEAR
EYT2011-12	6418220	QUAIU #3*2//SHA5/WEAVER
EYT2011-12	6415196	WBLL1*2/KURUKU/3/WHEAR/VIVITSI//WHEAR
EYT2011-12	6415199	WBLL1*2/KURUKU//KIRITATI/2*TRCH
EYT2011-12	6417135	WBLL1/KUKUNA//TACUPETO F2001/3/QUAIU #2
EYT2011-12	6415191	WBLL1*2/KURUKU/3/WHEAR/VIVITSI//WHEAR
EYT2011-12	6415193	WBLL1*2/KURUKU/3/WHEAR/VIVITSI//WHEAR
EYT2011-12	6418228	THELIN/3/BABAX/LR42//BABAX/4/BABAX/LR42//BABAX/5/BOW/NKT//CBRD/3/CBRD/6/FRET2*2/BRAMBLING
EYT2011-12	6417141	WEAVER/TSC//WEAVER/3/WEAVER/4/2*SERI.1B*2/3/KAUZ*2/BOW//KAUZ/5/WHEAR/VIVITSI//WHEAR
EYT2011-12	6418236	THELIN/3/BABAX/LR42//BABAX/4/BABAX/LR42//BABAX/5/HEILO/6/FRET2*2/BRAMBLING
EYT2011-12	6418235	THELIN/3/BABAX/LR42//BABAX/4/BABAX/LR42//BABAX/5/HEILO/6/FRET2*2/BRAMBLING
EYT2011-12	6417140	WEAVER/TSC//WEAVER/3/WEAVER/4/2*SERI.1B*2/3/KAUZ*2/BOW//KAUZ/5/WHEAR/VIVITSI//WHEAR
EYT2011-12	6417352	KACHU/BECARD//WBLL1*2/BRAMBLING
EYT2011-12	6417110	BECARD/QUAIU #1
EYT2011-12	6418200	THELIN/2*WBLL1//HEILO
EYT2011-12	6415172	BECARD/FRNCLN
EYT2011-12	6418440	KIRITATI//ATTILA*2/PASTOR/3/KINGBIRD #1/4/KIRITATI//2*ATTILA*2/PASTOR
EYT2011-12	6417351	KACHU/BECARD//WBLL1*2/BRAMBLING
EYT2011-12	6417114	BECARD/QUAIU #1
EYT2011-12	6418446	MUNAL*2//WBLL1*2/BRAMBLING
EYT2011-12	6415177	BECARD/CHYAK
EYT2011-12	6417115	BECARD/QUAIU #1
EYT2011-12	6418445	WAXWING*2/TUKURU*2//PVN
EYT2011-12	6415176	BECARD/CHYAK
EYT2011-12	6417112	BECARD/QUAIU #1
EYT2011-12	6417113	BECARD/QUAIU #1
EYT2011-12	6415170	BECARD/FRNCLN
EYT2011-12	6418208	CHIBIA//PRLII/CM65531/3/FISCAL/4/NG8675/CBRD/5/PRINIA/PASTOR
EYT2011-12	6417116	BECARD/QUAIU #1
EYT2011-12	6417117	BECARD/QUAIU #1
EYT2011-12	6418205	FRNCLN/3/GUAM92//PSN/BOW/4/PAURAQ
EYT2011-12	6415184	WBLL1*2/KUKUNA/4/WHEAR/KUKUNA/3/C80.1/3*BATAVIA//2*WBLL1
EYT2011-12	6417122	BECARD #1/CHONTE
EYT2011-12	6415188	WBLL1*2/KUKUNA//KIRITATI/2*TRCH
EYT2011-12	6415187	WBLL1*2/KUKUNA/4/WHEAR/KUKUNA/3/C80.1/3*BATAVIA//2*WBLL1
EYT2011-12	6415180	BECARD/CHYAK
EYT2011-12	6415182	WBLL1*2/KUKUNA/4/WHEAR/KUKUNA/3/C80.1/3*BATAVIA//2*WBLL1
EYT2011-12	6418217	QUAIU #3*2//SHA5/WEAVER
EYT2011-12	6415151	BECARD/GRACK
EYT2011-12	6415393	DANPHE #1/3/HUW234+LR34/PRINIA//PFAU/WEAVER
EYT2011-12	6415394	DANPHE #1/3/HUW234+LR34/PRINIA//PFAU/WEAVER
EYT2011-12	6415152	BECARD/GRACK
EYT2011-12	6417335	KAUZ*2/MNV//KAUZ/3/MILAN/4/BAV92/5/AKURI/6/MILAN/S87230//BAV92
EYT2011-12	6415396	MILAN/S87230//BAV92/3/HUW234+LR34/PRINIA//PFAU/WEAVER
EYT2011-12	6417332	KAUZ*2/MNV//KAUZ/3/MILAN/4/BAV92/5/AKURI/6/MILAN/S87230//BAV92
EYT2011-12	6417336	KAUZ*2/MNV//KAUZ/3/MILAN/4/BAV92/5/AKURI/6/MILAN/S87230//BAV92
EYT2011-12	6418431	BABAX/LR42//BABAX*2/3/KURUKU/4/KINGBIRD #1/5/QUAIU #2
EYT2011-12	6417342	KACHU/PVN//KACHU
EYT2011-12	6415161	BECARD/FRNCLN
EYT2011-12	6415164	BECARD/FRNCLN
EYT2011-12	6415163	BECARD/FRNCLN
EYT2011-12	6418434	BABAX/LR42//BABAX*2/4/SNI/TRAP#1/3/KAUZ*2/TRAP//KAUZ/5/KINGBIRD #1/6/QUAIU
EYT2011-12	6415165	BECARD/FRNCLN
EYT2011-12	6417107	BECARD/QUAIU #1
EYT2011-12	6417106	BECARD/QUAIU #1
EYT2011-12	6417555	FRET2/TUKURU//FRET2/3/MUNAL #1
EYT2011-12	6415132	BECARD/QUAIU #1
EYT2011-12	6415135	BECARD/DANPHE
EYT2011-12	6415137	BECARD #1/5/KIRITATI/4/2*SERI.1B*2/3/KAUZ*2/BOW//KAUZ
EYT2011-12	6418404	BABAX/LR42//BABAX*2/3/PAVON 7S3, +LR47/4/MUU
EYT2011-12	6417557	FRET2/TUKURU//FRET2/3/MUNAL #1
EYT2011-12	6415141	BECARD #1/5/KIRITATI/4/2*SERI.1B*2/3/KAUZ*2/BOW//KAUZ
EYT2011-12	6415386	CHIBIA//PRLII/CM65531/3/FISCAL/4/ND643/2*WBLL1
EYT2011-12	6417563	GAN/AE.SQUARROSA (408)//2*OASIS/5*BORL95/3/TACUPETO F2001*2/BRAMBLING
EYT2011-12	6415147	BECARD/GRACK
EYT2011-12	6415149	BECARD/GRACK
EYT2011-12	6336692	PANDORA//WBLL1*2/BRAMBLING/3/WBLL1*2/BRAMBLING
EYT2011-12	6418419	WAXWING/4/SNI/TRAP#1/3/KAUZ*2/TRAP//KAUZ/5/PAURAQ
EYT2011-12	6415356	MUNAL/WESTONIA
EYT2011-12	6335391	KIRITATI//PRL/2*PASTOR/5/OASIS/SKAUZ//4*BCN/3/PASTOR/4/KAUZ*2/YACO//KAUZ/6/KIRITATI//PRL/2*PASTOR
EYT2011-12	6417535	BL2064//SW89-5124*2/FASAN/3/TILHI/4/KIRITATI/WBLL1
EYT2011-12	6335388	KIRITATI//PRL/2*PASTOR/5/OASIS/SKAUZ//4*BCN/3/PASTOR/4/KAUZ*2/YACO//KAUZ/6/KIRITATI//PRL/2*PASTOR
EYT2011-12	6415124	WBLL1*2/BRAMBLING//CHYAK
EYT2011-12	6417300	FRET2*2/BRAMBLING//MUNAL #1/3/PAURAQ
EYT2011-12	6415129	BECARD/QUAIU #1
EYT2011-12	6415100	VILLA JUAREZ F2009/CHYAK
EYT2011-12	6415104	WBLL1*2/BRAMBLING//QUAIU
EYT2011-12	6415108	WBLL1*2/BRAMBLING//QUAIU
EYT2011-12	6415349	MUNAL/WESTONIA
EYT2011-12	6415317	NL1048/4/CHIBIA//PRLII/CM65531/3/SKAUZ/BAV92
EYT2011-12	6414684	CHUANMAI 42*2/3/PFAU/WEAVER*2//TRANSFER#12,P88.272.2
EYT2011-12	6414683	CHUANMAI 42*2/3/PFAU/WEAVER*2//TRANSFER#12,P88.272.2
EYT2011-12	6414699	ROLF07/CHYAK
EYT2011-12	6414698	ROLF07/FRNCLN
EYT2011-12	6339110	KINGBIRD #1/INQALAB 91//INQALAB 91*2/KUKUNA
EYT2011-12	6342755	VORB/FISCAL//KACHU/3/WBLL1*2/BRAMBLING
EYT2011-12	6414882	SAAR/WBLL1//VILLA JUAREZ F2009
EYT2011-12	6340127	QUAIU #3*2/3/TAM200/PASTOR//TOBA97
EYT2011-12	6414862	SAAR//INQALAB 91*2/KUKUNA/3/VILLA JUAREZ F2009
EYT2011-12	6414622	FRNCLN/HEILO//FRNCLN
EYT2011-12	6414863	SAAR//INQALAB 91*2/KUKUNA/3/VILLA JUAREZ F2009
EYT2011-12	6414878	SAAR/WBLL1//VILLA JUAREZ F2009
EYT2011-12	6414607	TAM200/PASTOR//TOBA97/3/HEILO/4/PAURAQ
EYT2011-12	6414846	MUU/KBIRD
EYT2011-12	6414845	MUU/FRNCLN
EYT2011-12	6414853	PFAU/WEAVER*2//TRANSFER#12,P88.272.2/3/WHEAR/VIVITSI//WHEAR
EYT2011-12	6418187	CHIBIA//PRLII/CM65531/3/SKAUZ/BAV92/4/HEILO/5/FRET2/KUKUNA//FRET2
EYT2011-12	6414827	PFAU/SERI.1B//AMAD/3/WAXWING/4/DANPHE #1
EYT2011-12	6418191	KAUZ*2/MNV//KAUZ/3/MILAN/4/BAV92/5/HEILO/6/CHIBIA//PRLII/CM65531/3/SKAUZ/BAV92
EYT2011-12	6414836	PFAU/SERI.1B//AMAD/3/WAXWING/4/VILLA JUAREZ F2009
EYT2011-12	6414831	PFAU/SERI.1B//AMAD/3/WAXWING/5/WAXWING/4/SNI/TRAP#1/3/KAUZ*2/TRAP//KAUZ
EYT2011-12	6414834	PFAU/SERI.1B//AMAD/3/WAXWING/4/VILLA JUAREZ F2009
EYT2011-12	6417075	WAXWING/4/SNI/TRAP#1/3/KAUZ*2/TRAP//KAUZ/5/PAURAQ
EYT2011-12	6417076	WAXWING/4/SNI/TRAP#1/3/KAUZ*2/TRAP//KAUZ/5/PAURAQ
EYT2011-12	6417073	WAXWING/4/SNI/TRAP#1/3/KAUZ*2/TRAP//KAUZ/5/PAURAQ
EYT2011-12	6414804	DANPHE #1/GRACK
EYT2011-12	6418178	ATTILA/3*BCN*2//BAV92/3/HEILO/4/CHIBIA//PRLII/CM65531/3/SKAUZ/BAV92
EYT2011-12	6417086	WAXWING/4/SNI/TRAP#1/3/KAUZ*2/TRAP//KAUZ/5/FRNCLN
EYT2011-12	6414818	PBW343*2/KUKUNA/3/PASTOR//CHIL/PRL/4/GRACK
EYT2011-12	6418387	CHUANMAI 43*2/3/ATTILA/3*BCN*2//BAV92
EYT2011-12	6418385	CHUANMAI 43*2/3/ATTILA/3*BCN*2//BAV92
EYT2011-12	6418398	BABAX/LR42//BABAX*2/3/KURUKU/4/MUNAL
EYT2011-12	6418399	BABAX/LR42//BABAX*2/3/KURUKU/4/MUNAL
EYT2011-12	6415095	VILLA JUAREZ F2009/CHYAK
EYT2011-12	6417274	BL2064//SW89-5124*2/FASAN/3/TILHI*2/4/KIRITATI
EYT2011-12	6418367	WBLL1*2/KIRITATI//HEILO/3/PAURAQ
EYT2011-12	6418361	FRNCLN//BR23/EMB27/3/FRNCLN
EYT2011-12	6418376	YUNMAI 47*2/4/BABAX/LR42//BABAX*2/3/TUKURU
EYT2011-12	6417045	GRACK/VILLA JUAREZ F2009
EYT2011-12	6417048	GRACK/VILLA JUAREZ F2009
EYT2011-12	6417282	CHIBIA//PRLII/CM65531/3/SKAUZ/BAV92*2/4/QUAIU
EYT2011-12	6417283	CHIBIA//PRLII/CM65531/3/SKAUZ/BAV92*2/4/QUAIU
EYT2011-12	6418371	FRNCLN/HEILO//FRNCLN
EYT2011-12	6415074	WBLL1*2/4/YACO/PBW65/3/KAUZ*2/TRAP//KAUZ/5/KIRITATI/2*TRCH
EYT2011-12	6417015	TAM200/PASTOR//TOBA97/3/PAURAQ
EYT2011-12	6418347	MUNAL/HEILO//MUNAL
EYT2011-12	6415077	WBLL1*2/4/YACO/PBW65/3/KAUZ*2/TRAP//KAUZ/5/KIRITATI/2*TRCH
EYT2011-12	6418349	MUNAL/HEILO//MUNAL
EYT2011-12	6417262	ATTILA/3*BCN//BAV92/3/PASTOR/4/MUNAL #1/5/MUNAL
EYT2011-12	6418352	FRNCLN//BR23/EMB27/3/FRNCLN
EYT2011-12	6418356	FRNCLN//BR23/EMB27/3/FRNCLN
EYT2011-12	6415293	CHYAK/PAURAQ
EYT2011-12	6417471	ND643//2*ATTILA*2/PASTOR/3/WBLL1*2/KURUKU/4/WBLL1*2/BRAMBLING
EYT2011-12	6417472	ND643//2*ATTILA*2/PASTOR/3/WBLL1*2/KURUKU/4/WBLL1*2/BRAMBLING
EYT2011-12	6415295	CHYAK/5/KIRITATI/4/2*SERI.1B*2/3/KAUZ*2/BOW//KAUZ
EYT2011-12	6417479	SHORTENED SR26 TRANSLOCATION//TACUPETO F2001*2/BRAMBLING/3/TACUPETO F2001*2/BRAMBLING
EYT2011-12	6418327	OASIS/SKAUZ//4*BCN*2/3/PASTOR/4/HEILO/5/PAURAQ
EYT2011-12	6418330	PBW343/WBLL1//PANDION/3/HEILO/4/PAURAQ
EYT2011-12	6417002	PYN/BAU//2*PASTOR/3/KIRITATI/2*TRCH
EYT2011-12	6417248	ATTILA/3*BCN//BAV92/3/PASTOR/4/TACUPETO F2001*2/BRAMBLING/5/PAURAQ
EYT2011-12	6418338	SKAUZ/BAV92//CHUM18/7*BCN/3/HEILO/4/PAURAQ
EYT2011-12	6417213	BECARD//ND643/2*WBLL1
EYT2011-12	6417455	ND643/2*WBLL1//ATTILA*2/PBW65/3/MUNAL
EYT2011-12	6418300	BABAX/LR42//BABAX*2/4/SNI/TRAP#1/3/KAUZ*2/TRAP//KAUZ/5/CBRD/6/CHIBIA//PRLII/CM65531/3/SW89.5181/KAUZ
EYT2011-12	6418308	CHIBIA//PRLII/CM65531/3/SKAUZ/BAV92*2/4/GONDO/CBRD
EYT2011-12	6415043	WAXWING//PFAU/WEAVER/3/FRNCLN
EYT2011-12	6415042	WAXWING//PFAU/WEAVER/3/FRNCLN
EYT2011-12	6418314	FRET2/KUKUNA//FRET2/3/HEILO/4/BABAX/LR42//BABAX*2/3/KURUKU
EYT2011-12	6415287	CHYAK/PAURAQ
EYT2011-12	6417467	ND643/2*WBLL1/5/2*WAXWING/4/SNI/TRAP#1/3/KAUZ*2/TRAP//KAUZ
EYT2011-12	6415044	WAXWING//PFAU/WEAVER/3/FRNCLN
EYT2011-12	6415047	WAXWING//PFAU/WEAVER/3/FRNCLN
EYT2011-12	6418311	CHIBIA//PRLII/CM65531/3/SKAUZ/BAV92*2/4/GONDO/CBRD
EYT2011-12	6415049	WAXWING/4/SNI/TRAP#1/3/KAUZ*2/TRAP//KAUZ/5/GRACK
EYT2011-12	6418317	KAUZ*2/MNV//KAUZ/3/MILAN/4/BAV92/5/HEILO/6/CHIBIA//PRLII/CM65531/3/SKAUZ/BAV92
EYT2012-13	6683637	BAJ #1/DANPHE
EYT2012-13	6680126	PRL/2*PASTOR//WHEAR/SOKOLL
EYT2012-13	6683638	BAJ #1/DANPHE
EYT2012-13	6681699	HEILO//MILAN/MUNIA/3/KIRITATI/2*TRCH
EYT2012-13	6680370	BERKUT//PBW343*2/KUKUNA/3/KINGBIRD #1
EYT2012-13	6683642	BAJ #1/PAURAQUE #1
EYT2012-13	6683641	BAJ #1/PAURAQUE #1
EYT2012-13	6680131	ATTILA*2/PBW65/5/PRL/2*PASTOR/4/CHOIX/STAR/3/HE1/3*CNO79//2*SERI
EYT2012-13	6683648	VILLA JUAREZ F2009/DANPHE #1
EYT2012-13	6683406	TACUPETO F2001*2/BRAMBLING//KIRITATI/2*TRCH
EYT2012-13	6683647	VILLA JUAREZ F2009/DANPHE #1
EYT2012-13	6683405	TACUPETO F2001*2/BRAMBLING//KIRITATI/2*TRCH
EYT2012-13	6683402	TACUPETO F2001*2/BRAMBLING//KIRITATI/2*TRCH
EYT2012-13	6683644	VILLA JUAREZ F2009/DANPHE #1
EYT2012-13	6683651	VILLA JUAREZ F2009/DANPHE #1
EYT2012-13	6683650	VILLA JUAREZ F2009/DANPHE #1
EYT2012-13	6683419	KACHU/DANPHE
EYT2012-13	6683655	VILLA JUAREZ F2009/DANPHE #1
EYT2012-13	6680149	WHEAR/VIVITSI//WHEAR/3/PANDORA
EYT2012-13	6683409	TACUPETO F2001*2/BRAMBLING//KIRITATI/2*TRCH
EYT2012-13	6680150	WHEAR/VIVITSI//WHEAR/3/PANDORA
EYT2012-13	6683424	KACHU/DANPHE
EYT2012-13	6683423	KACHU/DANPHE
EYT2012-13	6683425	KACHU//KIRITATI/2*TRCH
EYT2012-13	6680561	HUW234+LR34/PRINIA//PBW343*2/KUKUNA/3/ROLF07/4/WHEAR/SOKOLL
EYT2012-13	6681899	BAJ #1/KISKADEE #1
EYT2012-13	6681657	PBW65/2*PASTOR//KIRITATI/2*TRCH
EYT2012-13	6680563	WHEAR/SOKOLL//MUU
EYT2012-13	6680569	WHEAR/SOKOLL//ND643/2*WBLL1
EYT2012-13	6565566	PRL/2*PASTOR//PBW343*2/KUKUNA/3/ROLF07/4/KINGBIRD #1
EYT2012-13	6565563	PRL/2*PASTOR//PBW343*2/KUKUNA/3/ROLF07/4/KINGBIRD #1
EYT2012-13	6679336	BECARD//ND643/2*WBLL1
EYT2012-13	6679339	TACUPETO F2001*2/BRAMBLING//WHEAR/SOKOLL
EYT2012-13	6680572	WHEAR/SOKOLL//WAXWING*2/KRONSTAD F2004
EYT2012-13	6680571	WHEAR/SOKOLL//ND643/2*WBLL1
EYT2012-13	6679102	BAVIS #1/5/PRL/2*PASTOR/4/CHOIX/STAR/3/HE1/3*CNO79//2*SERI
EYT2012-13	6683604	MUU/FRNCLN
EYT2012-13	6680576	WHEAR/SOKOLL/4/PRINIA/PASTOR//HUITES/3/MILAN/OTUS//ATTILA/3*BCN
EYT2012-13	6680579	WHEAR/SOKOLL/4/PRINIA/PASTOR//HUITES/3/MILAN/OTUS//ATTILA/3*BCN
EYT2012-13	6683601	MUU/FRNCLN
EYT2012-13	6464471	KACHU/BECARD//WBLL1*2/BRAMBLING
EYT2012-13	6680342	WHEAR/KRONSTAD F2004//MUNAL #1
EYT2012-13	6680583	WHEAR/SOKOLL/4/PRINIA/PASTOR//HUITES/3/MILAN/OTUS//ATTILA/3*BCN
EYT2012-13	6683614	SAAR//INQALAB 91*2/KUKUNA/3/KIRITATI/2*TRCH
EYT2012-13	6680586	WHEAR/SOKOLL/4/PRINIA/PASTOR//HUITES/3/MILAN/OTUS//ATTILA/3*BCN
EYT2012-13	6680585	WHEAR/SOKOLL/4/PRINIA/PASTOR//HUITES/3/MILAN/OTUS//ATTILA/3*BCN
EYT2012-13	6681676	QUAIU #1/4/PFAU/SERI.1B//AMAD/3/WAXWING
EYT2012-13	6680347	WHEAR/KRONSTAD F2004//MUNAL #1
EYT2012-13	6681677	QUAIU #1/4/PFAU/SERI.1B//AMAD/3/WAXWING
EYT2012-13	6680594	WHEAR/SOKOLL/4/PRINIA/PASTOR//HUITES/3/MILAN/OTUS//ATTILA/3*BCN
EYT2012-13	6680599	WHEAR//2*PRL/2*PASTOR/3/QUAIU #1
EYT2012-13	6680355	C80.1/3*BATAVIA//2*WBLL1/3/C80.1/3*QT4522//2*PASTOR/4/WHEAR/SOKOLL
EYT2012-13	6680597	WHEAR/SOKOLL/4/PRINIA/PASTOR//HUITES/3/MILAN/OTUS//ATTILA/3*BCN
EYT2012-13	6680596	WHEAR/SOKOLL/4/PRINIA/PASTOR//HUITES/3/MILAN/OTUS//ATTILA/3*BCN
EYT2012-13	6683621	CHONTE//KIRITATI/2*TRCH
EYT2012-13	6565554	PRL/2*PASTOR//PBW343*2/KUKUNA/3/ROLF07/4/BERKUT//PBW343*2/KUKUNA
EYT2012-13	6565553	PRL/2*PASTOR//PBW343*2/KUKUNA/3/ROLF07/4/BERKUT//PBW343*2/KUKUNA
EYT2012-13	6679125	TRCH*2/3/C80.1/3*QT4118//3*PASTOR/4/DANPHE
EYT2012-13	6680760	ND643/2*WAXWING//SAAR/2*WAXWING
EYT2012-13	6680763	ND643/2*WAXWING//SAAR/2*WAXWING
EYT2012-13	6681856	PRL/2*PASTOR/4/CHOIX/STAR/3/HE1/3*CNO79//2*SERI/5/KIRITATI/2*TRCH
EYT2012-13	6681851	MUU/FRNCLN
EYT2012-13	6680766	ND643/2*WAXWING//SAAR/2*WAXWING
EYT2012-13	6681853	MUU/FRNCLN
EYT2012-13	6564676	WAXWING//SAAR/2*WAXWING
EYT2012-13	6682938	WBLL1*2/BRAMBLING*2//BAVIS
EYT2012-13	6681849	MUU/FRNCLN
EYT2012-13	6682939	WBLL1*2/BRAMBLING*2//BAVIS
EYT2012-13	6680533	SERI.1B*2/3/KAUZ*2/BOW//KAUZ/4/PBW343*2/TUKURU/5/C80.1/3*BATAVIA//2*WBLL1/6/WHEAR/SOKOLL
EYT2012-13	6681868	CHONTE//KIRITATI/2*TRCH
EYT2012-13	6682957	WHEAR/KUKUNA/3/C80.1/3*BATAVIA//2*WBLL1*2/4/NIINI #1
EYT2012-13	6680536	SERI.1B*2/3/KAUZ*2/BOW//KAUZ/4/PBW343*2/TUKURU/5/C80.1/3*BATAVIA//2*WBLL1/6/WHEAR/SOKOLL
EYT2012-13	6680535	SERI.1B*2/3/KAUZ*2/BOW//KAUZ/4/PBW343*2/TUKURU/5/C80.1/3*BATAVIA//2*WBLL1/6/WHEAR/SOKOLL
EYT2012-13	6679309	PICAFLOR #2/3/BERKUT//PBW343*2/KUKUNA
EYT2012-13	6565774	WHEAR/KIRITATI/3/C80.1/3*BATAVIA//2*WBLL1/4/TACUPETO F2001*2/BRAMBLING
EYT2012-13	6681871	CHONTE//KIRITATI/2*TRCH
EYT2012-13	6680540	PFAU/SERI.1B//AMAD*2/3/PBW343*2/KUKUNA/4/WHEAR/SOKOLL
EYT2012-13	6680306	TRCH*2/3/C80.1/3*QT4118//3*PASTOR/4/DANPHE
EYT2012-13	6680555	PRL/2*PASTOR//PBW343*2/KUKUNA/3/ROLF07/4/ND643/2*WBLL1
EYT2012-13	6681889	TUKURU//BAV92/RAYON/4/WHEAR/KUKUNA/3/C80.1/3*BATAVIA//2*WBLL1
EYT2012-13	6681643	ROLF07//ND643/2*WBLL1
EYT2012-13	6680556	PRL/2*PASTOR//PBW343*2/KUKUNA/3/ROLF07/4/ND643/2*WBLL1
EYT2012-13	6679328	WBLL1*2/BRAMBLING//WHEAR/SOKOLL
EYT2012-13	6680723	QUAIU #1/BECARD
EYT2012-13	6680716	VILLA JUAREZ F2009/5/BABAX/LR42//BABAX*2/4/SNI/TRAP#1/3/KAUZ*2/TRAP//KAUZ
EYT2012-13	6678885	KIRITATI/2*TRCH//WBLL1*2/BRAMBLING
EYT2012-13	6678887	KIRITATI/2*TRCH//WBLL1*2/BRAMBLING
EYT2012-13	6681824	PFAU/SERI.1B//AMAD/3/WAXWING/4/KIRITATI/2*TRCH
EYT2012-13	6681820	PFAU/SERI.1B//AMAD/3/WAXWING/4/QUAIU #2
EYT2012-13	6680727	WBLL1*2/BRAMBLING/5/BABAX/LR42//BABAX*2/4/SNI/TRAP#1/3/KAUZ*2/TRAP//KAUZ
EYT2012-13	6680725	QUAIU #1/BECARD
EYT2012-13	6681817	PFAU/SERI.1B//AMAD/3/WAXWING/4/QUAIU #2
EYT2012-13	6678895	WAXWING//PFAU/WEAVER/3/WHEAR/SOKOLL
EYT2012-13	6679501	BABAX/LR42//BABAX*2/3/KURUKU/4/WHEAR/KUKUNA/3/C80.1/3*BATAVIA//2*WBLL1/5/MUNAL #1
EYT2012-13	6681833	PFAU/SERI.1B//AMAD/3/WAXWING/4/ND643/2*WBLL1
EYT2012-13	6681835	PFAU/SERI.1B//AMAD/3/WAXWING/4/WHEAR/KIRITATI/3/C80.1/3*BATAVIA//2*WBLL1
EYT2012-13	6680744	BAVIS #1//ND643/2*WBLL1
EYT2012-13	6681831	PFAU/SERI.1B//AMAD/3/WAXWING/4/ND643/2*WBLL1
EYT2012-13	6680738	BAVIS #1//ND643/2*WBLL1
EYT2012-13	6681827	PFAU/SERI.1B//AMAD/3/WAXWING/4/KIRITATI/2*TRCH
EYT2012-13	6681828	PFAU/SERI.1B//AMAD/3/WAXWING/4/KIRITATI/2*TRCH
EYT2012-13	6682933	WBLL1*2/BRAMBLING//TAM200/TUI/3/VILLA JUAREZ F2009
EYT2012-13	6681844	MUU/FRNCLN
EYT2012-13	6682935	WBLL1*2/BRAMBLING//TAM200/TUI/3/VILLA JUAREZ F2009
EYT2012-13	6680756	ND643/2*WBLL1//BECARD
EYT2012-13	6681840	PFAU/SERI.1B//AMAD/3/WAXWING/4/WHEAR/VIVITSI//WHEAR
EYT2012-13	6565952	BAVIS #1//ND643/2*WBLL1
EYT2012-13	6682925	BAJ #1*2/3/HUW234+LR34/PRINIA//PFAU/WEAVER
EYT2012-13	6568075	KACHU//KIRITATI/2*TRCH
EYT2012-13	6680913	BABAX/LR42//BABAX*2/3/PAVON 7S3, +LR47/4/ND643/2*WBLL1/5/BABAX/LR42//BABAX*2/3/PAVON 7S3, +LR47
EYT2012-13	6680917	BABAX/LR42//BABAX*2/3/PAVON 7S3, +LR47/4/ND643/2*WBLL1/5/BABAX/LR42//BABAX*2/3/PAVON 7S3, +LR47
EYT2012-13	6683193	SHORTENED SR26 TRANSLOCATION/3/MILAN/S87230//BAV92/4/2*MILAN/S87230//BAV92
EYT2012-13	6564964	BECARD/MUNAL #1
EYT2012-13	6568291	BAJ #1/4/PFAU/SERI.1B//AMAD/3/WAXWING
EYT2012-13	6568296	WBLL1*2/BRAMBLING//QUAIU
EYT2012-13	6568297	WBLL1*2/BRAMBLING//QUAIU
EYT2012-13	6568052	ELVIRA/5/CNDO/R143//ENTE/MEXI75/3/AE.SQ/4/2*OCI/6/VEE/PJN//KAUZ/3/PASTOR/7/CHONTE #1
EYT2012-13	6680937	QUAIU #1/5/KIRITATI/4/2*SERI.1B*2/3/KAUZ*2/BOW//KAUZ/6/BECARD
EYT2012-13	6681802	ND643/2*WBLL1//KACHU
EYT2012-13	6568066	HEILO//MILAN/MUNIA/3/KIRITATI/2*TRCH
EYT2012-13	6680712	PFAU/MILAN/4/VEE/TRAP#1//ANGRA/3/PASTOR/5/PRL/2*PASTOR/4/CHOIX/STAR/3/HE1/3*CNO79//2*SERI
EYT2012-13	6684243	BAJ #1/2*CHYAK1
EYT2012-13	6463812	BECARD #1/5/KIRITATI/4/2*SERI.1B*2/3/KAUZ*2/BOW//KAUZ
EYT2012-13	6568279	FRNCLN/BECARD
EYT2012-13	6568280	FRNCLN/BECARD
EYT2012-13	6684250	WHEAR/KUKUNA/3/C80.1/3*BATAVIA//2*WBLL1*2/4/NIINI #1
EYT2012-13	6684266	CHYAK1*2/3/HUW234+LR34/PRINIA//PFAU/WEAVER
EYT2012-13	6684263	WHEAR/KUKUNA/3/C80.1/3*BATAVIA//2*WBLL1*2/4/KIRITATI//HUW234+LR34/PRINIA
EYT2012-13	6684265	CHYAK1*2/3/HUW234+LR34/PRINIA//PFAU/WEAVER
EYT2012-13	6568254	MUNAL/FRNCLN
EYT2012-13	6568253	MUNAL/FRNCLN
EYT2012-13	6463832	BECARD/CHYAK
EYT2012-13	6684261	WHEAR/KUKUNA/3/C80.1/3*BATAVIA//2*WBLL1*2/4/KIRITATI//HUW234+LR34/PRINIA
EYT2012-13	6684278	SWSR22T.B./5/KAUZ//ALTAR 84/AOS/3/KAUZ/4/SW94.15464/6/2*PRL/2*PASTOR
EYT2012-13	6568262	FRNCLN/DANPHE
EYT2012-13	6680905	BABAX/LR42//BABAX*2/3/KURUKU/4/DANPHE #1/5/BECARD
EYT2012-13	6683181	SHORTENED SR26 TRANSLOCATION/3/KIRITATI//PBW65/2*SERI.1B/4/2*DANPHE #1
EYT2012-13	6684272	SWSR22T.B./5/KAUZ//ALTAR 84/AOS/3/KAUZ/4/SW94.15464/6/2*PRL/2*PASTOR
EYT2012-13	6683596	PFAU/SERI.1B//AMAD/3/WAXWING/4/ND643/2*WBLL1
EYT2012-13	6683595	PFAU/SERI.1B//AMAD/3/WAXWING/4/ND643/2*WBLL1
EYT2012-13	6679098	BAVIS #1/5/PRL/2*PASTOR/4/CHOIX/STAR/3/HE1/3*CNO79//2*SERI
EYT2012-13	6683598	PFAU/SERI.1B//AMAD/3/WAXWING/4/ND643/2*WBLL1
EYT2012-13	6683597	PFAU/SERI.1B//AMAD/3/WAXWING/4/ND643/2*WBLL1
EYT2012-13	6683592	PFAU/SERI.1B//AMAD/3/WAXWING/4/ND643/2*WBLL1
EYT2012-13	6683593	PFAU/SERI.1B//AMAD/3/WAXWING/4/ND643/2*WBLL1
EYT2012-13	6566054	SERI.1B*2/3/KAUZ*2/BOW//KAUZ*2/5/CNO79//PF70354/MUS/3/PASTOR/4/BAV92/6/PRL/2*PASTOR//PBW343*2/KUKUNA/3/ROLF07
EYT2012-13	6682029	WHEAR/KIRITATI/3/C80.1/3*BATAVIA//2*WBLL1/4/WHEAR/KUKUNA/3/C80.1/3*BATAVIA//2*WBLL1
EYT2012-13	6683117	SHORTENED SR26 TRANSLOCATION/4/3*CHIBIA//PRLII/CM65531/3/SKAUZ/BAV92
EYT2012-13	6566292	C80.1/3*BATAVIA//2*WBLL1/3/TOBA97/PASTOR/4/PRL/2*PASTOR//PBW343*2/KUKUNA/3/ROLF07
EYT2012-13	6566056	SERI.1B*2/3/KAUZ*2/BOW//KAUZ*2/5/CNO79//PF70354/MUS/3/PASTOR/4/BAV92/6/PRL/2*PASTOR//PBW343*2/KUKUNA/3/ROLF07
EYT2012-13	6683590	PFAU/SERI.1B//AMAD/3/WAXWING/5/KIRITATI/4/2*SERI.1B*2/3/KAUZ*2/BOW//KAUZ
EYT2012-13	6682032	WHEAR/KIRITATI/3/C80.1/3*BATAVIA//2*WBLL1/4/WHEAR/KUKUNA/3/C80.1/3*BATAVIA//2*WBLL1
EYT2012-13	6569575	FRET2/TUKURU//FRET2/3/PRL
EYT2012-13	6683369	FRET2/KUKUNA//FRET2/3/KIRITATI/2*TRCH
EYT2012-13	6568248	MUNAL/5/KIRITATI/4/2*SERI.1B*2/3/KAUZ*2/BOW//KAUZ
EYT2012-13	6568003	ROLF07/PAURAQUE #1
EYT2012-13	6568246	MUNAL//KIRITATI/2*TRCH
EYT2012-13	6682046	WHEAR/KUKUNA/3/C80.1/3*BATAVIA//2*WBLL1/5/PRL/2*PASTOR/4/CHOIX/STAR/3/HE1/3*CNO79//2*SERI
EYT2012-13	6683135	SHORTENED SR26 TRANSLOCATION//FRET2*2/BRAMBLING/3/2*FRET2*2/BRAMBLING
EYT2012-13	6566033	SAAR/2*WAXWING/5/PRL/2*PASTOR/4/CHOIX/STAR/3/HE1/3*CNO79//2*SERI
EYT2012-13	6682048	WHEAR/KUKUNA/3/C80.1/3*BATAVIA//2*WBLL1/5/PRL/2*PASTOR/4/CHOIX/STAR/3/HE1/3*CNO79//2*SERI
EYT2012-13	6569308	SWSR22T.B./5/KAUZ//ALTAR 84/AOS/3/KAUZ/4/SW94.15464/6/2*PRL/2*PASTOR
EYT2012-13	6566038	SAAR/2*WAXWING//FRNCLN
EYT2012-13	6569306	SWSR22T.B./5/KAUZ//ALTAR 84/AOS/3/KAUZ/4/SW94.15464/6/2*PRL/2*PASTOR
EYT2012-13	6463635	PRL/2*PASTOR//PAURAQUE #1
EYT2012-13	6566034	SAAR/2*WAXWING/5/PRL/2*PASTOR/4/CHOIX/STAR/3/HE1/3*CNO79//2*SERI
EYT2012-13	6566037	SAAR/2*WAXWING//FRNCLN
EYT2012-13	6463633	PRL/2*PASTOR//DANPHE #1
EYT2012-13	6566036	SAAR/2*WAXWING//FRNCLN
EYT2012-13	6683370	FRET2/KUKUNA//FRET2/3/KIRITATI/2*TRCH
EYT2012-13	6683388	HUW234+LR34/PRINIA//KRONSTAD F2004/3/BAJ #1
EYT2012-13	6683382	HEILO//MILAN/MUNIA/3/KIRITATI/2*TRCH
EYT2012-13	6683384	HEILO//MILAN/MUNIA/3/KIRITATI/2*TRCH
EYT2012-13	6568221	TUKURU//BAV92/RAYON/3/DANPHE
EYT2012-13	6569310	SWSR22T.B./5/KAUZ//ALTAR 84/AOS/3/KAUZ/4/SW94.15464/6/2*PRL/2*PASTOR
EYT2012-13	6568222	TUKURU//BAV92/RAYON/3/DANPHE
EYT2012-13	6568220	TUKURU//BAV92/RAYON/3/DANPHE
EYT2012-13	6683550	ND643/2*WBLL1/4/WHEAR/KUKUNA/3/C80.1/3*BATAVIA//2*WBLL1
EYT2012-13	6684408	SWSR22T.B./4/2*BABAX/LR42//BABAX*2/3/KURUKU/5/WBLL1*2/KURUKU
EYT2012-13	6566016	MUNAL #1//WAXWING*2/KRONSTAD F2004
EYT2012-13	6566018	MUNAL #1//WAXWING*2/KRONSTAD F2004
EYT2012-13	6569526	SWSR22T.B.//TACUPETO F2001*2/BRAMBLING/3/2*TACUPETO F2001*2/BRAMBLING
EYT2012-13	6680293	TRCH*2/3/C80.1/3*QT4118//3*PASTOR/4/DANPHE
EYT2012-13	6683323	BLUEGIL-3/3/NG8675/CBRD//MILAN/4/PSN/BOW//MILAN/5/KIRITATI/2*TRCH
EYT2012-13	6680296	TRCH*2/3/C80.1/3*QT4118//3*PASTOR/4/DANPHE
EYT2012-13	6683560	ND643/2*WBLL1//KACHU
EYT2012-13	6569530	SWSR22T.B.//TACUPETO F2001*2/BRAMBLING/3/2*TACUPETO F2001*2/BRAMBLING
EYT2012-13	6684418	SWSR22T.B./4/3*CHIBIA//PRLII/CM65531/3/SKAUZ/BAV92
EYT2012-13	6683329	BLUEGIL-3/3/NG8675/CBRD//MILAN/4/PSN/BOW//MILAN/5/KIRITATI/2*TRCH
EYT2012-13	6568200	SERI.1B*2/3/KAUZ*2/BOW//KAUZ/5/CNO79//PF70354/MUS/3/PASTOR/4/BAV92/6/ND643/2*WBLL1
EYT2012-13	6683510	KIRITATI/4/2*SERI.1B*2/3/KAUZ*2/BOW//KAUZ/5/BECARD
EYT2012-13	6683513	MILAN/S87230//BAV92/3/ND643/2*WBLL1
EYT2012-13	6565008	WAXWING/KRONSTAD F2004//FRNCLN
EYT2012-13	6680495	SW89.5277/BORL95//SKAUZ/3/PRL/2*PASTOR/4/HEILO/5/WHEAR/SOKOLL
EYT2012-13	6683522	MILAN/S87230//BAV92/3/ND643/2*WBLL1
EYT2012-13	6683524	MILAN/S87230//BAV92/3/ND643/2*WBLL1
EYT2012-13	6565012	BRBT1*2/KIRITATI/3/KIRITATI//2*PRL/2*PASTOR
EYT2012-13	6683531	MILAN/S87230//BAV92/3/PRL
EYT2012-13	6566316	PBW343/HUITES/3/MILAN/OTUS//ATTILA/3*BCN/5/PRL/2*PASTOR/4/CHOIX/STAR/3/HE1/3*CNO79//2*SERI
EYT2012-13	6565465	PASTOR/3/VORONA/CNO79//KAUZ/4/MILAN/OTUS//ATTILA/3*BCN/5/MUNAL #1
EYT2012-13	6683541	ND643/2*WBLL1//VILLA JUAREZ F2009
EYT2012-13	6683540	ND643/2*WBLL1//VILLA JUAREZ F2009
EYT2012-13	6683543	ND643/2*WBLL1//VILLA JUAREZ F2009
EYT2012-13	6680274	GRACKLE #1/KINGBIRD #1
EYT2012-13	6565470	PASTOR/3/VORONA/CNO79//KAUZ/4/MILAN/OTUS//ATTILA/3*BCN/5/MUNAL #1
EYT2012-13	6683306	BLUEGIL-3/3/NG8675/CBRD//MILAN/4/PSN/BOW//MILAN/5/KIRITATI/2*TRCH
EYT2012-13	6683546	ND643/2*WBLL1/4/WHEAR/KUKUNA/3/C80.1/3*BATAVIA//2*WBLL1
EYT2012-13	6681777	ND643/2*WBLL1//VILLA JUAREZ F2009
EYT2012-13	6681773	MILAN/S87230//BAV92/3/ND643/2*WBLL1
EYT2012-13	6565686	MP4010/MUNAL #1
EYT2012-13	6565206	MINO/898.97/4/PFAU/SERI.1B//AMAD/3/KRONSTAD F2004
EYT2012-13	6565209	KAUZ//ALTAR 84/AOS/3/PASTOR/4/873.97/5/MUNAL #1
EYT2012-13	6681781	ND643/2*WBLL1//VILLA JUAREZ F2009
EYT2012-13	6680452	QUAIU/3/WHEAR//2*PRL/2*PASTOR
EYT2012-13	6680693	PFAU/MILAN/4/VEE/TRAP#1//ANGRA/3/PASTOR/5/PRL/2*PASTOR/4/CHOIX/STAR/3/HE1/3*CNO79//2*SERI
EYT2012-13	6680698	PFAU/MILAN/4/VEE/TRAP#1//ANGRA/3/PASTOR/5/PRL/2*PASTOR/4/CHOIX/STAR/3/HE1/3*CNO79//2*SERI
EYT2012-13	6680455	FRET2*2/BRAMBLING/3/WHEAR//2*PRL/2*PASTOR
EYT2012-13	6681789	ND643/2*WBLL1//VILLA JUAREZ F2009
EYT2012-13	6680215	CHIBIA//PRLII/CM65531/3/SKAUZ/BAV92/4/HUW234+LR34/PRINIA//PBW343*2/KUKUNA/3/ROLF07
EYT2012-13	6681793	ND643/2*WBLL1/4/WHEAR/KUKUNA/3/C80.1/3*BATAVIA//2*WBLL1
EYT2012-13	6679471	WHEAR/KIRITATI/3/C80.1/3*BATAVIA//2*WBLL1/4/TACUPETO F2001*2/BRAMBLING
EYT2012-13	6679476	WHEAR/KIRITATI/3/C80.1/3*BATAVIA//2*WBLL1/4/TACUPETO F2001*2/BRAMBLING
EYT2012-13	6679233	PRL/2*PASTOR/5/HUITES/4/CS/TH.SC//3*PVN/3/MIRLO/BUC/6/KINGBIRD #1
EYT2012-13	6681799	ND643/2*WBLL1//KACHU
EYT2012-13	6681796	ND643/2*WBLL1/4/WHEAR/KUKUNA/3/C80.1/3*BATAVIA//2*WBLL1
EYT2012-13	6681797	ND643/2*WBLL1//KACHU
EYT2012-13	6681798	ND643/2*WBLL1//KACHU
EYT2012-13	6679236	TILHI/PALMERIN F2004//KBIRD
EYT2012-13	6464368	CHYAK1/VILLA JUAREZ F2009
EYT2012-13	6680476	PASTOR/3/VORONA/CNO79//KAUZ/4/MILAN/OTUS//ATTILA/3*BCN/5/KINGBIRD #1
EYT2012-13	6680233	CHIBIA//PRLII/CM65531/3/SKAUZ/BAV92/4/HUW234+LR34/PRINIA//PBW343*2/KUKUNA/3/ROLF07
EYT2012-13	6680880	KRONSTAD F2004//ND643/2*WBLL1/3/WHEAR/KRONSTAD F2004
EYT2012-13	6681733	KACHU//KIRITATI/2*TRCH
EYT2012-13	6681735	KACHU//KIRITATI/2*TRCH
EYT2012-13	6681731	KACHU//KIRITATI/2*TRCH
EYT2012-13	6681968	BECARD #1/5/KIRITATI/4/2*SERI.1B*2/3/KAUZ*2/BOW//KAUZ
EYT2012-13	6681726	TACUPETO F2001*2/BRAMBLING//KIRITATI/2*TRCH
EYT2012-13	6681727	KACHU//KIRITATI/2*TRCH
EYT2012-13	6679412	HUW234+LR34/PRINIA//PBW343*2/KUKUNA/3/ROLF07/4/PRL/2*PASTOR//PBW343*2/KUKUNA
EYT2012-13	6679413	HUW234+LR34/PRINIA//PBW343*2/KUKUNA/3/ROLF07/4/PRL/2*PASTOR//PBW343*2/KUKUNA
EYT2012-13	6565889	WBLL1*2/KURUKU//TACUPETO F2001*2/BRAMBLING
EYT2012-13	6679415	HUW234+LR34/PRINIA//PBW343*2/KUKUNA/3/ROLF07/4/PRL/2*PASTOR//PBW343*2/KUKUNA
EYT2012-13	6679417	C80.1/3*BATAVIA//2*WBLL1/3/PBW343*2/KUKUNA/4/C80.1/3*BATAVIA//2*WBLL1/5/KINGBIRD #1
EYT2012-13	6680653	MILAN/KAUZ//BABAX/3/BAV92/4/WHEAR/SOKOLL
EYT2012-13	6680898	PRL/2*PASTOR*2//PAURAQUE #1
EYT2012-13	6680656	MILAN/KAUZ//BABAX/3/BAV92/4/WHEAR//2*PRL/2*PASTOR
EYT2012-13	6681743	KACHU//KIRITATI/2*TRCH
EYT2012-13	6681979	WBLL1/KUKUNA//TACUPETO F2001/3/FRANCOLIN #1
EYT2012-13	6681737	KACHU//KIRITATI/2*TRCH
EYT2012-13	6681990	WBLL4/KUKUNA//WBLL1/4/WHEAR/KUKUNA/3/C80.1/3*BATAVIA//2*WBLL1
EYT2012-13	6680665	MILAN/KAUZ//BABAX/3/BAV92/4/WHEAR//2*PRL/2*PASTOR
EYT2012-13	6564777	KIRITATI/2*TRCH//WBLL1*2/BRAMBLING
EYT2012-13	6679200	WHEAR/KRONSTAD F2004//WHEAR/SOKOLL
EYT2012-13	6680675	WHEAR/KIRITATI/3/C80.1/3*BATAVIA//2*WBLL1/4/TACUPETO F2001*2/BRAMBLING
EYT2012-13	6683705	WHEAR/KUKUNA/3/C80.1/3*BATAVIA//2*WBLL1/5/PRL/2*PASTOR/4/CHOIX/STAR/3/HE1/3*CNO79//2*SERI
EYT2012-13	6681769	KIRITATI/WBLL1/4/WHEAR/KIRITATI/3/C80.1/3*BATAVIA//2*WBLL1
EYT2012-13	6565632	WHEAR/SOKOLL/4/PRINIA/PASTOR//HUITES/3/MILAN/OTUS//ATTILA/3*BCN
EYT2012-13	6681933	VILLA JUAREZ F2009/DANPHE #1
EYT2012-13	6681934	VILLA JUAREZ F2009/DANPHE #1
EYT2012-13	6681930	BAJ #1/KISKADEE #1
EYT2012-13	6681924	BAJ #1/KISKADEE #1
EYT2012-13	6681942	VILLA JUAREZ F2009/DANPHE #1
EYT2012-13	6681701	HEILO//MILAN/MUNIA/3/KIRITATI/2*TRCH
EYT2012-13	6681944	VILLA JUAREZ F2009/DANPHE #1
EYT2012-13	6680612	WHEAR//2*PRL/2*PASTOR/3/MUNAL #1
EYT2012-13	6681940	VILLA JUAREZ F2009/DANPHE #1
EYT2012-13	6681938	VILLA JUAREZ F2009/DANPHE #1
EYT2012-13	6568093	KIRITATI//HUW234+LR34/PRINIA/3/BAJ #1
EYT2012-13	6680863	TRCH*2//ND643/2*WBLL1
EYT2012-13	6681712	TACUPETO F2001*2/BRAMBLING//KIRITATI/2*TRCH
EYT2012-13	6681713	TACUPETO F2001*2/BRAMBLING//KIRITATI/2*TRCH
EYT2012-13	6568098	KIRITATI/2*WBLL1//KISKADEE #1
EYT2012-13	6681950	BECARD #1/5/KIRITATI/4/2*SERI.1B*2/3/KAUZ*2/BOW//KAUZ
EYT2012-13	6680622	WHEAR//2*PRL/2*PASTOR/3/WHEAR/SOKOLL
EYT2012-13	6569184	WBLL1*2/BRAMBLING//NIINI #1/3/VILLA JUAREZ F2009
EYT2012-13	6681947	VILLA JUAREZ F2009/DANPHE #1
EYT2012-13	6681706	HEILO//MILAN/MUNIA/3/KIRITATI/2*TRCH
EYT2012-13	6681949	VILLA JUAREZ F2009/DANPHE #1
EYT2012-13	6569191	WBLL1*2/BRAMBLING//NIINI #1/3/VILLA JUAREZ F2009
EYT2012-13	6681722	TACUPETO F2001*2/BRAMBLING//KIRITATI/2*TRCH
EYT2012-13	6681725	TACUPETO F2001*2/BRAMBLING//KIRITATI/2*TRCH
EYT2012-13	6680634	WHEAR/KIRITATI/3/C80.1/3*BATAVIA//2*WBLL1/4/PFAU/WEAVER*2//TRANSFER#12,P88.272.2
EYT2012-13	6569194	WBLL1*2/BRAMBLING*2/3/ND643//2*PRL/2*PASTOR
EYT2012-13	6681720	TACUPETO F2001*2/BRAMBLING//KIRITATI/2*TRCH
EYT2012-13	6680876	KRONSTAD F2004//ND643/2*WBLL1/3/WHEAR/KRONSTAD F2004
EYT2012-13	6680633	WHEAR/KIRITATI/3/C80.1/3*BATAVIA//2*WBLL1/4/PFAU/WEAVER*2//TRANSFER#12,P88.272.2
EYT2012-13	6681719	TACUPETO F2001*2/BRAMBLING//KIRITATI/2*TRCH
EYT2012-13	6681716	TACUPETO F2001*2/BRAMBLING//KIRITATI/2*TRCH
EYT2012-13	6681717	TACUPETO F2001*2/BRAMBLING//KIRITATI/2*TRCH
EYT2012-13	6565838	TIMBA/ELVIRA/3/BERKUT//PBW343*2/KUKUNA
EYT2012-13	6564744	DANPHE/BAJ #1
EYT2012-13	6565919	WBLL1*2/BRAMBLING/5/BABAX/LR42//BABAX*2/4/SNI/TRAP#1/3/KAUZ*2/TRAP//KAUZ
EYT2012-13	6568193	SAAR//PBW343*2/KUKUNA/3/MUNAL
EYT2012-13	6683088	SWSR22T.B./KACHU//2*KACHU
EYT2012-13	6683087	SWSR22T.B./KACHU//2*KACHU
EYT2012-13	6680812	WHEAR/VIVITSI//WHEAR/3/BECARD
EYT2012-13	6680809	WHEAR/VIVITSI//WHEAR/3/BECARD
EYT2012-13	6683083	SWSR22T.B./KACHU//2*KACHU
EYT2012-13	6680820	WHEAR/KIRITATI/3/C80.1/3*BATAVIA//2*WBLL1/4/BECARD
EYT2012-13	6680815	WHEAR/VIVITSI//WHEAR/3/WHEAR/SOKOLL
EYT2012-13	6681908	BAJ #1/KISKADEE #1
EYT2012-13	6680819	WHEAR/KIRITATI/3/C80.1/3*BATAVIA//2*WBLL1/4/BECARD
EYT2012-13	6680817	WHEAR/KIRITATI/3/C80.1/3*BATAVIA//2*WBLL1/4/BECARD
EYT2012-13	6568181	PRL/2*PASTOR/4/CHOIX/STAR/3/HE1/3*CNO79//2*SERI/5/KIRITATI/2*TRCH
EYT2012-13	6681921	BAJ #1/KISKADEE #1
EYT2012-13	6680831	WHEAR/KIRITATI/3/C80.1/3*BATAVIA//2*WBLL1/4/WHEAR/SOKOLL
EYT2012-13	6681917	BAJ #1/KISKADEE #1
EYT2012-13	6681915	BAJ #1/KISKADEE #1
EYT2012-13	6683035	SWSR22T.B.//TAM200/TUI/3/2*VILLA JUAREZ F2009
EYT2012-13	6683033	HD2824*2/4/WHEAR/KUKUNA/3/C80.1/3*BATAVIA//2*WBLL1
EYT2012-13	6568153	PFAU/SERI.1B//AMAD/3/WAXWING/4/ND643/2*WBLL1
EYT2012-13	6569241	CHUANMAI 42*2/KINDE
EYT2012-13	6678924	WHEAR/KUKUNA/3/C80.1/3*BATAVIA//2*WBLL1/4/WAXWING*2/KRONSTAD F2004
EYT2012-13	6678927	WHEAR/KUKUNA/3/C80.1/3*BATAVIA//2*WBLL1/4/WAXWING*2/KRONSTAD F2004
EYT2012-13	6569248	CHUANMAI 42/2*CHONTE
EYT2012-13	6678929	WHEAR/KUKUNA/3/C80.1/3*BATAVIA//2*WBLL1/4/WAXWING*2/KRONSTAD F2004
EYT2012-13	6678922	WHEAR/KUKUNA/3/C80.1/3*BATAVIA//2*WBLL1/4/WAXWING*2/KRONSTAD F2004
EYT2012-13	6683284	KRONSTAD F2004/PAURAQ
EYT2012-13	6568164	PFAU/SERI.1B//AMAD/3/WAXWING/4/FRNCLN
EYT2012-13	6568165	PFAU/SERI.1B//AMAD/3/WAXWING/4/FRNCLN
EYT2012-13	6568162	PFAU/SERI.1B//AMAD/3/WAXWING/4/MUNAL
EYT2012-13	6568169	PFAU/SERI.1B//AMAD/3/WAXWING/4/WHEAR/KIRITATI/3/C80.1/3*BATAVIA//2*WBLL1
EYT2012-13	6683040	SWSR22T.B./5/KAUZ//ALTAR 84/AOS/3/KAUZ/4/SW94.15464/6/2*PRL/2*PASTOR
EYT2012-13	6683282	TRCH/DANPHE
EYT2012-13	6683298	PRL/2*PASTOR/3/PFAU/WEAVER*2//CHAPIO
EYT2012-13	6683296	PRL/2*PASTOR/3/PFAU/WEAVER*2//CHAPIO
EYT2012-13	6569222	WHEAR/KUKUNA/3/C80.1/3*BATAVIA//2*WBLL1*2/4/NIINI #1
EYT2012-13	6568140	PBW343*2/KUKUNA/3/PASTOR//CHIL/PRL/4/PAURAQUE #1
EYT2012-13	6683475	DANPHE/CHONTE
EYT2012-13	6683474	DANPHE/CHONTE
EYT2012-13	6683477	KIRITATI//HUW234+LR34/PRINIA/3/BAJ #1
EYT2012-13	6683476	KIRITATI//HUW234+LR34/PRINIA/3/BAJ #1
EYT2012-13	6569440	SHORTENED SR26 TRANSLOCATION//3*PBW65/2*PASTOR
EYT2012-13	6569441	SHORTENED SR26 TRANSLOCATION/4/ATTILA/3*BCN//BAV92/3/PASTOR/5/MUNAL/6/MUNAL #1
EYT2012-13	6683479	KIRITATI//HUW234+LR34/PRINIA/3/BAJ #1
EYT2012-13	6569206	BECARD*2/HARIL #1
EYT2012-13	6683244	SHORTENED SR26 TRANSLOCATION//2*WBLL1*2/KKTS/3/BECARD
EYT2012-13	6684333	SWSR22T.B./4/2*BABAX/LR42//BABAX*2/3/KURUKU/5/WBLL1*2/KURUKU
EYT2012-13	6684335	SWSR22T.B./4/2*BABAX/LR42//BABAX*2/3/KURUKU/5/WBLL1*2/KURUKU
EYT2012-13	6683482	KIRITATI//HUW234+LR34/PRINIA/3/BAJ #1
EYT2012-13	6683483	KIRITATI//HUW234+LR34/PRINIA/3/BAJ #1
EYT2012-13	6569459	SHORTENED SR26 TRANSLOCATION/QUAIU//QUAIU/3/QUAIU #2
EYT2012-13	6683480	KIRITATI//HUW234+LR34/PRINIA/3/BAJ #1
EYT2012-13	6684342	SWSR22T.B./4/2*BABAX/LR42//BABAX*2/3/KURUKU/5/WBLL1*2/KURUKU
EYT2012-13	6684341	SWSR22T.B./4/2*BABAX/LR42//BABAX*2/3/KURUKU/5/WBLL1*2/KURUKU
EYT2012-13	6565063	PBW343*2/KUKUNA//PBW343*2/KUKUNA/3/BERKUT//PBW343*2/KUKUNA
EYT2012-13	6684347	SWSR22T.B./4/2*BABAX/LR42//BABAX*2/3/KURUKU/5/WBLL1*2/KURUKU
EYT2012-13	6568339	WHEAR/KUKUNA/3/C80.1/3*BATAVIA//2*WBLL1/4/KBIRD
EYT2012-13	6683490	KIRITATI//HUW234+LR34/PRINIA/3/FRANCOLIN #1
EYT2012-13	6569431	SWSR22T.B.//TOBA97/PASTOR/3/TOBA97/PASTOR/4/PBW65/2*PASTOR
EYT2012-13	6568106	KIRITATI/WBLL1/4/WHEAR/KIRITATI/3/C80.1/3*BATAVIA//2*WBLL1
EYT2012-13	6683673	BECARD/DANPHE
EYT2012-13	6683672	BECARD/DANPHE
EYT2012-13	6683433	KACHU//KIRITATI/2*TRCH
EYT2012-13	6683432	KACHU//KIRITATI/2*TRCH
EYT2012-13	6565042	WAXWING*2/KRONSTAD F2004/4/PRL/2*PASTOR//PBW343*2/KUKUNA/3/ROLF07
EYT2012-13	6683676	BECARD #1/5/KIRITATI/4/2*SERI.1B*2/3/KAUZ*2/BOW//KAUZ
EYT2012-13	6565044	WAXWING*2/KRONSTAD F2004/4/PRL/2*PASTOR//PBW343*2/KUKUNA/3/ROLF07
EYT2012-13	6565052	WAXWING*2/KRONSTAD F2004//BECARD
EYT2012-13	6683449	KACHU//KIRITATI/2*TRCH
EYT2012-13	6683446	KACHU//KIRITATI/2*TRCH
EYT2012-13	6683445	KACHU//KIRITATI/2*TRCH
EYT2012-13	6565292	LERKE/5/KAUZ/3/MYNA/VUL//BUC/FLK/4/MILAN/6/PROGRESO F2007/7/PRL/2*PASTOR/4/CHOIX/STAR/3/HE1/3*CNO79//2*SERI
EYT2012-13	6683455	KACHU//KIRITATI/2*TRCH
EYT2012-13	6680187	KACHU//WHEAR/SOKOLL
EYT2012-13	6683456	KACHU/CHONTE
EYT2012-13	6683459	KACHU/CHONTE
EYT2012-13	6463797	WBLL1*2/BRAMBLING//DANPHE #1
EYT2012-13	6683465	DANPHE/CHONTE
EYT2012-13	6683462	DANPHE/CHONTE
EYT2012-13	6683468	DANPHE/CHONTE
EYT2012-13	6684316	SWSR22T.B./HARIL #1//2*VILLA JUAREZ F2009
EYT2012-13	6683227	SHORTENED SR26 TRANSLOCATION//WBLL1*2/BRAMBLING/3/2*VILLA JUAREZ F2009
EYT2012-13	6565037	TRCH*2/3/C80.1/3*QT4118//3*PASTOR/4/DANPHE
EYT2012-13	6565276	LERKE/5/KAUZ/3/MYNA/VUL//BUC/FLK/4/MILAN/6/PROGRESO F2007/7/KIRITATI/4/2*SERI.1B*2/3/KAUZ*2/BOW//KAUZ
EYT2012-13	6681451	FRANCOLIN #1*2//ND643/2*WBLL1
EYT2012-13	6681453	FRANCOLIN #1*2//ND643/2*WBLL1
EYT2012-13	6681459	FRANCOLIN #1*2//ND643/2*WBLL1
EYT2012-13	6567780	CHYAK//ND643/2*WBLL1/3/WHEAR/SOKOLL
EYT2012-13	6681454	FRANCOLIN #1*2//ND643/2*WBLL1
EYT2012-13	6567306	PAURAQ/3/KIRITATI//PRL/2*PASTOR/4/PAURAQUE #1
EYT2012-13	6567301	PAURAQ//KIRITATI/2*TRCH/3/PAURAQUE #1
EYT2012-13	6692111	JUP/ZP//COC/3/PVN/4/2*TNMU/5/SITE/6/TNMU/7/ATTILA/PASTOR
EYT2012-13	6691023	FALCIN/AE.SQUARROSA (312)/3/THB/CEP7780//SHA4/LIRA/4/FRET2/5/PAURAQ/6/MILAN/KAUZ//DHARWAR DRY/3/BAV92
EYT2012-13	6692115	YANG87-142//SHA4/CHIL/3/TNMU/4/CHONTE
EYT2012-13	6692117	YANG87-142//SHA4/CHIL/3/TNMU/4/PAURAQUE #1
EYT2012-13	6681462	FRANCOLIN #1*2//ND643/2*WBLL1
EYT2012-13	6681464	FRANCOLIN #1*2//ND643/2*WBLL1
EYT2012-13	6681466	FRANCOLIN #1*2//ND643/2*WBLL1
EYT2012-13	6681226	PBW343*2/KUKUNA/3/PASTOR//CHIL/PRL/4/PAURAQUE #1/5/PBW343*2/KUKUNA//PBW343*2/KUKUNA
EYT2012-13	6691492	92.001E7.32.5/SLVS/4/WHEAR/KUKUNA/3/C80.1/3*BATAVIA//2*WBLL1
EYT2012-13	6567313	PAURAQ/5/KIRITATI/4/2*SERI.1B*2/3/KAUZ*2/BOW//KAUZ/6/PAURAQUE #1
EYT2012-13	6691493	92.001E7.32.5/SLVS/4/WHEAR/KUKUNA/3/C80.1/3*BATAVIA//2*WBLL1
EYT2012-13	6691494	92.001E7.32.5/SLVS/4/WHEAR/KUKUNA/3/C80.1/3*BATAVIA//2*WBLL1
EYT2012-13	6692107	JUP/ZP//COC/3/PVN/4/2*TNMU/5/SITE/6/TNMU/7/PAURAQUE #1
EYT2012-13	6681472	FRANCOLIN #1/CHONTE//FRNCLN
EYT2012-13	6681477	FRANCOLIN #1/CHONTE//FRNCLN
EYT2012-13	6691281	W15.92/4/PASTOR//HXL7573/2*BAU/3/WBLL1/5/PAURAQUE #1
EYT2012-13	6691287	W15.92/4/PASTOR//HXL7573/2*BAU/3/WBLL1/5/MUNAL
EYT2012-13	6692131	W15.92/4/PASTOR//HXL7573/2*BAU/3/WBLL1/5/DANPHE #1
EYT2012-13	6691048	KRICHAUFF/WBLL1/6/CNDO/R143//ENTE/MEXI_2/3/AEGILOPS SQUARROSA (TAUS)/4/OCI/5/PASTOR/7/SUNCO.6/FRAME//PASTOR/8/ATTILA/BAV92//PASTOR
EYT2012-13	6691049	KRICHAUFF/WBLL1/6/CNDO/R143//ENTE/MEXI_2/3/AEGILOPS SQUARROSA (TAUS)/4/OCI/5/PASTOR/7/SUNCO.6/FRAME//PASTOR/8/ATTILA/BAV92//PASTOR
EYT2012-13	6692139	W15.92/4/PASTOR//HXL7573/2*BAU/3/WBLL1/5/MUU
EYT2012-13	6681000	FRET2/KUKUNA//FRET2/3/KIRITATI/2*TRCH/4/MUNAL #1
EYT2012-13	6681001	FRET2/KUKUNA//FRET2/3/KIRITATI/2*TRCH/4/MUNAL #1
EYT2012-13	6681002	FRET2/KUKUNA//FRET2/3/KIRITATI/2*TRCH/4/MUNAL #1
EYT2012-13	6681249	PFAU/SERI.1B//AMAD/3/WAXWING*2/4/ND643/2*WBLL1
EYT2012-13	6681008	FRET2/TUKURU//FRET2/3/DANPHE/4/WHEAR/SOKOLL
EYT2012-13	6681003	FRET2/KUKUNA//FRET2/3/KIRITATI/2*TRCH/4/MUNAL #1
EYT2012-13	6681004	FRET2/KUKUNA//FRET2/3/KIRITATI/2*TRCH/4/MUNAL #1
EYT2012-13	6681489	BAJ #1*2/KISKADEE #1
EYT2012-13	6681248	PFAU/SERI.1B//AMAD/3/WAXWING*2/4/ND643/2*WBLL1
EYT2012-13	6691033	KRICHAUFF/FINSI/3/URES/PRL//BAV92/5/NS-732/HER/3/PRL/SARA//TSI/VEE#5/4/FRET2/6/MILAN/KAUZ//DHARWAR DRY/3/BAV92
EYT2012-13	6678480	ND643//2*PRL/2*PASTOR*2/3/HEILO
EYT2012-13	6679573	FRET2*2/KIRITATI//KIRITATI/2*TRCH/3/WBLL1*2/BRAMBLING
EYT2012-13	6566892	PICAFLOR #1/CHONTE//FRANCOLIN #1
EYT2012-13	6691467	BABAX/LR42//BABAX/3/ER2000/4/PAURAQUE #1
EYT2012-13	6681424	WAXWING*2/TUKURU//2*FRNCLN
EYT2012-13	6567756	CHEWINK #1/FRNCLN/4/WHEAR/KUKUNA/3/C80.1/3*BATAVIA//2*WBLL1
EYT2012-13	6566665	HUW234+LR34/PRINIA//PFAU/WEAVER/3/WAXWING*2/BRAMBLING/4/HUW234+LR34/PRINIA//KRONSTAD F2004
EYT2012-13	6681419	WAXWING*2/TUKURU//2*FRNCLN
EYT2012-13	6681430	WAXWING*2/TUKURU//KISKADEE #1/3/FRNCLN
EYT2012-13	6681434	WAXWING*2/TUKURU//KISKADEE #1/3/FRNCLN
EYT2012-13	6566876	KIRITATI//PBW65/2*SERI.1B/4/2*WHEAR/KUKUNA/3/C80.1/3*BATAVIA//2*WBLL1
EYT2012-13	6681429	WAXWING*2/TUKURU//KISKADEE #1/3/FRNCLN
EYT2012-13	6566873	KIRITATI//PBW65/2*SERI.1B/3/WBLL1*2/BRAMBLING/4/WBLL1*2/BRAMBLING
EYT2012-13	6691004	KA/NAC//TRCH*2/3/ATTILA*2/PBW65
EYT2012-13	6566879	KIRITATI//PBW65/2*SERI.1B/4/2*WHEAR/KUKUNA/3/C80.1/3*BATAVIA//2*WBLL1
EYT2012-13	6566638	FRET2/KUKUNA//FRET2/3/KIRITATI/2*TRCH/4/MUNAL #1
EYT2012-13	6681441	FRANCOLIN #1/5/KIRITATI/4/2*SERI.1B*2/3/KAUZ*2/BOW//KAUZ/6/FRNCLN
EYT2012-13	6681200	ND643/2*WBLL1/4/CHIBIA//PRLII/CM65531/3/SKAUZ/BAV92/5/BECARD
EYT2012-13	6681449	FRANCOLIN #1*2//ND643/2*WBLL1
EYT2012-13	6566882	KIRITATI//PBW65/2*SERI.1B/4/2*WHEAR/KUKUNA/3/C80.1/3*BATAVIA//2*WBLL1
EYT2012-13	6566883	KIRITATI//PBW65/2*SERI.1B/4/2*WHEAR/KUKUNA/3/C80.1/3*BATAVIA//2*WBLL1
EYT2012-13	6691659	BAVIS*2/MUNAL
EYT2012-13	6681605	WHEAR/KUKUNA/3/C80.1/3*BATAVIA//2*WBLL1/4/PAURAQUE #1/5/WHEAR/KUKUNA/3/C80.1/3*BATAVIA//2*WBLL1
EYT2012-13	6679775	PFAU/SERI.1B//AMAD/3/WAXWING*2/4/ND643/2*WBLL1
EYT2012-13	6691422	SUNCO.6/FRAME//PASTOR/3/2*ATTILA/PASTOR
EYT2012-13	6691665	BAVIS*2//ATTILA/PASTOR
EYT2012-13	6679532	QUAIU/BECARD//BECARD
EYT2012-13	6679535	QUAIU/BECARD//BECARD
EYT2012-13	6679776	PFAU/SERI.1B//AMAD/3/WAXWING*2/4/ND643/2*WBLL1
EYT2012-13	6691663	BAVIS*2//ATTILA/PASTOR
EYT2012-13	6679537	QUAIU/BECARD//BECARD
EYT2012-13	6566857	KIRITATI//HUW234+LR34/PRINIA/3/FRANCOLIN #1/4/BAJ #1
EYT2012-13	6679778	PFAU/SERI.1B//AMAD/3/WAXWING*2/4/ND643/2*WBLL1
EYT2012-13	6679539	QUAIU/BECARD//BECARD
EYT2012-13	6691666	BAVIS*2//ATTILA/PASTOR
EYT2012-13	6690559	ATTILA*2/PBW65//BERKUT/11/CROC_1/AE.SQUARROSA (213)//PGO/10/ATTILA*2/9/KT/BAGE//FN/U/3/BZA/4/TRM/5/ALDAN/6/SERI/7/VEE#10/8/OPATA
EYT2012-13	6679780	PFAU/SERI.1B//AMAD/3/WAXWING*2/4/ND643/2*WBLL1
EYT2012-13	6678691	WHEAR/VIVITSI//WHEAR/5/WBLL1*2/4/YACO/PBW65/3/KAUZ*2/TRAP//KAUZ/6/VILLA JUAREZ F2009
EYT2012-13	6679783	PFAU/SERI.1B//AMAD/3/WAXWING*2/4/WHEAR/KIRITATI/3/C80.1/3*BATAVIA//2*WBLL1
EYT2012-13	6681624	CHYAK1/VILLA JUAREZ F2009//WBLL1*2/BRAMBLING
EYT2012-13	6681626	CHYAK1/VILLA JUAREZ F2009//WBLL1*2/BRAMBLING
EYT2012-13	6681620	WHEAR/VIVITSI//WHEAR*2/3/KACHU
EYT2012-13	6566860	KIRITATI//HUW234+LR34/PRINIA/3/FRANCOLIN #1/4/BAJ #1
EYT2012-13	6691653	BAVIS*2/MUNAL
EYT2012-13	6690562	ATTILA*2/PBW65//BERKUT/11/CROC_1/AE.SQUARROSA (213)//PGO/10/ATTILA*2/9/KT/BAGE//FN/U/3/BZA/4/TRM/5/ALDAN/6/SERI/7/VEE#10/8/OPATA
EYT2012-13	6679787	PFAU/SERI.1B//AMAD/3/WAXWING*2/4/WHEAR/KIRITATI/3/C80.1/3*BATAVIA//2*WBLL1
EYT2012-13	6678459	KIRITATI/WBLL1/5/WBLL1*2/4/YACO/PBW65/3/KAUZ*2/TRAP//KAUZ/6/WAXWING*2/TUKURU
EYT2012-13	6690567	VEE/MJI//2*TUI/3/PASTOR/4/BERKUT/5/ATTILA/3/WEAVER*2/TSC//WEAVER
EYT2012-13	6566867	KIRITATI//PBW65/2*SERI.1B/3/FRNCLN/4/FRANCOLIN #1
EYT2012-13	6679551	FRET2*2/4/SNI/TRAP#1/3/KAUZ*2/TRAP//KAUZ/5/KIRITATI/2*TRCH/6/BAJ #1
EYT2012-13	6681631	CHYAK1/VILLA JUAREZ F2009//WBLL1*2/BRAMBLING
EYT2012-13	6681633	CHYAK1/VILLA JUAREZ F2009//WBLL1*2/BRAMBLING
EYT2012-13	6566830	KIRITATI//2*PRL/2*PASTOR/3/CHONTE/5/PRL/2*PASTOR/4/CHOIX/STAR/3/HE1/3*CNO79//2*SERI
EYT2012-13	6681628	CHYAK1/VILLA JUAREZ F2009//WBLL1*2/BRAMBLING
EYT2012-13	6566843	KIRITATI//HUW234+LR34/PRINIA/4/WHEAR/KUKUNA/3/C80.1/3*BATAVIA//2*WBLL1/5/HUW234+LR34/PRINIA//PFAU/WEAVER
EYT2012-13	6691433	PASTOR/SLVS/3/D67.2/PARANA 66.270//AE.SQUARROSA (220)/4/2-49/2*PASTOR/5/ATTILA*2/PBW65/6/ATTILA/PASTOR
EYT2012-13	6566845	KIRITATI//HUW234+LR34/PRINIA/4/WHEAR/KUKUNA/3/C80.1/3*BATAVIA//2*WBLL1/5/HUW234+LR34/PRINIA//PFAU/WEAVER
EYT2012-13	6690529	ATTILA/3/URES/PRL//BAV92/4/WBLL1/5/MUNAL
EYT2012-13	6679970	WHEAR/KIRITATI/3/C80.1/3*BATAVIA//2*WBLL1*2/4/KIRITATI/2*TRCH
EYT2012-13	6680962	CROSBILL #1/DANPHE/7/CNDO/R143//ENTE/MEXI_2/3/AEGILOPS SQUARROSA (TAUS)/4/WEAVER/5/2*KAUZ/6/PRL/2*PASTOR
EYT2012-13	6680960	CHIBIA//PRLII/CM65531/3/FISCAL/4/2*CHONTE
EYT2012-13	6680965	CROSBILL #1/DANPHE/7/CNDO/R143//ENTE/MEXI_2/3/AEGILOPS SQUARROSA (TAUS)/4/WEAVER/5/2*KAUZ/6/PRL/2*PASTOR
EYT2012-13	6690530	ATTILA/3/URES/PRL//BAV92/4/WBLL1/5/MUNAL
EYT2012-13	6679972	WHEAR/KIRITATI/3/C80.1/3*BATAVIA//2*WBLL1*2/4/KIRITATI/2*TRCH
EYT2012-13	6690532	ATTILA/3/URES/PRL//BAV92/4/WBLL1/5/ATTILA/PASTOR
EYT2012-13	6690531	ATTILA/3/URES/PRL//BAV92/4/WBLL1/5/MUNAL
EYT2012-13	6679734	ND643/2*WBLL1//MUNAL/3/MUNAL #1
EYT2012-13	6566815	DANPHE #1/4/2*PFAU/SERI.1B//AMAD/3/WAXWING
EYT2012-13	6691622	BAVIS//ATTILA*2/PBW65/5/CROC_1/AE.SQUARROSA (205)//BORL95/3/PRL/SARA//TSI/VEE#5/4/FRET2
EYT2012-13	6690536	ATTILA/3/URES/PRL//BAV92/4/WBLL1/5/CROC_1/AE.SQUARROSA (205)//BORL95/3/PRL/SARA//TSI/VEE#5/4/FRET2
EYT2012-13	6691623	BAVIS//ATTILA*2/PBW65/5/CROC_1/AE.SQUARROSA (205)//BORL95/3/PRL/SARA//TSI/VEE#5/4/FRET2
EYT2012-13	6690535	ATTILA/3/URES/PRL//BAV92/4/WBLL1/5/CROC_1/AE.SQUARROSA (205)//BORL95/3/PRL/SARA//TSI/VEE#5/4/FRET2
EYT2012-13	6679980	WHEAR/KIRITATI/3/C80.1/3*BATAVIA//2*WBLL1*2/4/KIRITATI/2*TRCH
EYT2012-13	6679981	WHEAR/KIRITATI/3/C80.1/3*BATAVIA//2*WBLL1*2/4/KIRITATI/2*TRCH
EYT2012-13	6680977	ELVIRA/5/CNDO/R143//ENTE/MEXI75/3/AE.SQ/4/2*OCI/6/VEE/PJN//KAUZ/3/PASTOR/7/KIRITATI/4/2*SERI.1B*2/3/KAUZ*2/BOW//KAUZ/8/ELVIRA/5/CNDO/R143//ENTE/MEXI75/3/AE.SQ/4/2*OCI/6/VEE/PJN//KAUZ/3/PASTOR
EYT2012-13	6566821	DANPHE/PAURAQUE #1//MUNAL #1
EYT2012-13	6680967	CROSBILL #1/DANPHE/7/CNDO/R143//ENTE/MEXI_2/3/AEGILOPS SQUARROSA (TAUS)/4/WEAVER/5/2*KAUZ/6/PRL/2*PASTOR
EYT2012-13	6566828	KIRITATI//2*PRL/2*PASTOR/3/CHONTE/5/PRL/2*PASTOR/4/CHOIX/STAR/3/HE1/3*CNO79//2*SERI
EYT2012-13	6679983	WHEAR/KIRITATI/3/C80.1/3*BATAVIA//2*WBLL1*2/4/KIRITATI/2*TRCH
EYT2012-13	6679985	WHEAR/KIRITATI/3/C80.1/3*BATAVIA//2*WBLL1*2/4/KIRITATI/2*TRCH
EYT2012-13	6679987	WHEAR/KIRITATI/3/C80.1/3*BATAVIA//2*WBLL1*2/4/KIRITATI/2*TRCH
EYT2012-13	6691639	BAVIS*2/3/ATTILA/BAV92//PASTOR
EYT2012-13	6690549	ATTILA/3/URES/PRL//BAV92/4/WBLL1/5/VORB
EYT2012-13	6691638	BAVIS*2/3/ATTILA/BAV92//PASTOR
EYT2012-13	6680982	FRET2*2/4/SNI/TRAP#1/3/KAUZ*2/TRAP//KAUZ/5/KIRITATI/2*TRCH/6/BAJ #1
EYT2012-13	6680988	FRET2*2/KIRITATI//KIRITATI/2*TRCH/3/WBLL1*2/BRAMBLING
EYT2012-13	6680978	ELVIRA/5/CNDO/R143//ENTE/MEXI75/3/AE.SQ/4/2*OCI/6/VEE/PJN//KAUZ/3/PASTOR/7/KIRITATI/4/2*SERI.1B*2/3/KAUZ*2/BOW//KAUZ/8/ELVIRA/5/CNDO/R143//ENTE/MEXI75/3/AE.SQ/4/2*OCI/6/VEE/PJN//KAUZ/3/PASTOR
EYT2012-13	6679995	KISKADEE #1/DANPHE/4/WHEAR/KIRITATI/3/C80.1/3*BATAVIA//2*WBLL1
EYT2012-13	6691640	BAVIS*2/3/ATTILA/BAV92//PASTOR
EYT2012-13	6679996	WHEAR/KUKUNA/3/C80.1/3*BATAVIA//2*WBLL1*2/4/KIRITATI/2*TRCH
EYT2012-13	6691887	KA/NAC//TRCH/3/2*ATTILA*2/PBW65
EYT2012-13	6690538	ATTILA/3/URES/PRL//BAV92/4/WBLL1/5/CROC_1/AE.SQUARROSA (205)//BORL95/3/PRL/SARA//TSI/VEE#5/4/FRET2
EYT2012-13	6679760	PBW343*2/KUKUNA/3/PASTOR//CHIL/PRL/4/PAURAQUE #1/5/PBW343*2/KUKUNA//PBW343*2/KUKUNA
EYT2012-13	6680991	FRET2*2/KIRITATI//KIRITATI/2*TRCH/3/WBLL1*2/BRAMBLING
EYT2012-13	6680990	FRET2*2/KIRITATI//KIRITATI/2*TRCH/3/WBLL1*2/BRAMBLING
EYT2012-13	6680994	FRET2*2/KIRITATI//KIRITATI/2*TRCH/3/WBLL1*2/BRAMBLING
EYT2012-13	6681603	WHEAR/KUKUNA/3/C80.1/3*BATAVIA//2*WBLL1/4/PAURAQUE #1/5/WHEAR/KUKUNA/3/C80.1/3*BATAVIA//2*WBLL1
EYT2012-13	6680992	FRET2*2/KIRITATI//KIRITATI/2*TRCH/3/WBLL1*2/BRAMBLING
EYT2012-13	6681604	WHEAR/KUKUNA/3/C80.1/3*BATAVIA//2*WBLL1/4/PAURAQUE #1/5/WHEAR/KUKUNA/3/C80.1/3*BATAVIA//2*WBLL1
EYT2012-13	6680999	FRET2/KUKUNA//FRET2/3/KIRITATI/2*TRCH/4/MUNAL #1
EYT2012-13	6680997	FRET2*2/KIRITATI//KIRITATI/2*TRCH/3/WBLL1*2/BRAMBLING
EYT2012-13	6680989	FRET2*2/KIRITATI//KIRITATI/2*TRCH/3/WBLL1*2/BRAMBLING
EYT2012-13	6691630	BAVIS*2//ATTILA*2/PBW65
EYT2012-13	6691636	BAVIS*2/3/ATTILA/BAV92//PASTOR
EYT2012-13	6678439	KIRITATI/2*WBLL1/3/TAM200/PASTOR//TOBA97/4/VILLA JUAREZ F2009
EYT2012-13	6678438	KIRITATI/2*WBLL1/3/TAM200/PASTOR//TOBA97/4/VILLA JUAREZ F2009
EYT2012-13	6679937	BECARD//KIRITATI/2*TRCH/3/BECARD
EYT2012-13	6679933	BECARD//KIRITATI/2*TRCH/3/BECARD
EYT2012-13	6679935	BECARD//KIRITATI/2*TRCH/3/BECARD
EYT2012-13	6679934	BECARD//KIRITATI/2*TRCH/3/BECARD
EYT2012-13	6679708	MILAN/S87230//BAV92/3/KIRITATI/2*TRCH/4/WHEAR/KRONSTAD F2004
EYT2012-13	6679707	MILAN/S87230//BAV92/3/KIRITATI/2*TRCH/4/WHEAR/KRONSTAD F2004
EYT2012-13	6679949	WBLL4/KUKUNA//WBLL1*2/3/KBIRD
EYT2012-13	6679944	WBLL1*2/KUKUNA//KIRITATI/2*TRCH/3/BECARD
EYT2012-13	6679943	WBLL1*2/KUKUNA//KIRITATI/2*TRCH/3/BECARD
EYT2012-13	6679703	MILAN/S87230//BAV92/3/KIRITATI/2*TRCH/4/WHEAR/KRONSTAD F2004
EYT2012-13	6690506	92.001E7.32.5/SLVS//PAURAQUE #1
EYT2012-13	6679959	WHEAR//2*PRL/2*PASTOR/3/KIRITATI/2*TRCH/4/WHEAR//2*PRL/2*PASTOR
EYT2012-13	6679711	ND643/2*WBLL1//2*KACHU
EYT2012-13	6690510	ATTILA/3/URES/PRL//BAV92/4/WBLL1/5/BAVIS
EYT2012-13	6679953	WBLL4/KUKUNA//WBLL1*2/3/KBIRD
EYT2012-13	6679715	ND643/2*WBLL1//2*KACHU
EYT2012-13	6680952	CHIBIA//PRLII/CM65531/3/FISCAL/4/2*CHONTE
EYT2012-13	6680947	CHIBIA//PRLII/CM65531/3/FISCAL/4/DANPHE #1/5/CHIBIA//PRLII/CM65531/3/SKAUZ/BAV92
EYT2012-13	6690981	TOB/ERA//TOB/CNO67/3/PLO/4/VEE#5/5/KAUZ/6/FRET2/7/VORB/8/MILAN/KAUZ//DHARWAR DRY/3/BAV92
EYT2012-13	6679967	WHEAR/KIRITATI/3/C80.1/3*BATAVIA//2*WBLL1*2/4/KIRITATI/2*TRCH
EYT2012-13	6690931	SUNCO.6/FRAME//PASTOR/3/ATTILA/PASTOR/4/1447/PASTOR//KRICHAUFF
EYT2012-13	6690911	YANG87-142//SHA4/CHIL/3/TNMU/4/2*ATTILA/PASTOR
EYT2012-13	6690918	BAVIS*2/VORB
EYT2012-13	6690949	KA/NAC//TRCH*2/3/ATTILA/BAV92//PASTOR
EYT2012-13	6567164	MUU*2/PAURAQ
EYT2012-13	6679919	VILLA JUAREZ F2009*2//KIRITATI/2*TRCH
EYT2012-13	6567167	MUU*2/FRNCLN
EYT2012-13	6679928	VILLA JUAREZ F2009*2//KIRITATI/2*TRCH
EYT2012-13	6679927	VILLA JUAREZ F2009*2//KIRITATI/2*TRCH
EYT2012-13	6679929	VILLA JUAREZ F2009*2//KIRITATI/2*TRCH
EYT2012-13	6679924	VILLA JUAREZ F2009*2//KIRITATI/2*TRCH
EYT2012-13	6567385	MUNAL*2/CHONTE
EYT2012-13	6567386	GRACK//KIRITATI/2*TRCH/3/GRACKLE #1
EYT2012-13	6567383	MUNAL*2/CHONTE
EYT2012-13	6567381	MUNAL*2/CHONTE
EYT2012-13	6567387	GRACK//KIRITATI/2*TRCH/3/GRACKLE #1
EYT2012-13	6681187	ND643/2*WBLL1//2*KACHU
EYT2012-13	6567153	MUU/5/PRL/2*PASTOR/4/CHOIX/STAR/3/HE1/3*CNO79//2*SERI/6/PRL/2*PASTOR/4/CHOIX/STAR/3/HE1/3*CNO79//2*SERI
EYT2012-13	6567393	GRACK/4/WHEAR/KUKUNA/3/C80.1/3*BATAVIA//2*WBLL1/5/GRACKLE #1
EYT2012-13	6681194	ND643/2*WBLL1//2*KACHU
EYT2012-13	6681196	ND643/2*WBLL1//2*KACHU
EYT2012-13	6692094	BETTY/3/CHEN/AE.SQ//2*OPATA/4/BAVIS
EYT2012-13	6690910	YANG87-142//SHA4/CHIL/3/TNMU/4/2*ATTILA/PASTOR
EYT2012-13	6567130	PFAU/WEAVER*2//CHAPIO*2/3/FRNCLN
EYT2012-13	6567133	PFAU/WEAVER*2//CHAPIO*2/3/WBLL1*2/BRAMBLING
EYT2012-13	6567139	PFAU/WEAVER*2//CHAPIO*2/3/WBLL1*2/BRAMBLING
EYT2012-13	6567379	MUNAL*2//ND643/2*WBLL1
EYT2012-13	6567137	PFAU/WEAVER*2//CHAPIO*2/3/WBLL1*2/BRAMBLING
EYT2012-13	6567136	PFAU/WEAVER*2//CHAPIO*2/3/WBLL1*2/BRAMBLING
EYT2012-13	6681373	GRACK//KIRITATI/2*TRCH/3/GRACKLE #1
EYT2012-13	6680044	WHEAR/KUKUNA/3/C80.1/3*BATAVIA//2*WBLL1/4/KBIRD/5/WHEAR/KUKUNA/3/C80.1/3*BATAVIA//2*WBLL1
EYT2012-13	6567581	WBLL1*2/KUKUNA//KIRITATI/2*TRCH/3/BECARD
EYT2012-13	6680046	WHEAR/KUKUNA/3/C80.1/3*BATAVIA//2*WBLL1/4/KBIRD/5/WHEAR/KUKUNA/3/C80.1/3*BATAVIA//2*WBLL1
EYT2012-13	6567580	WBLL1*2/KUKUNA//KIRITATI/2*TRCH/3/BECARD
EYT2012-13	6692031	CROC_1/AE.SQUARROSA (213)//PGO/10/ATTILA*2/9/KT/BAGE//FN/U/3/BZA/4/TRM/5/ALDAN/6/SERI/7/VEE#10/8/OPATA/11/ATTILA*2/PBW65
EYT2012-13	6692023	BAVIS/4/MILAN/KAUZ//DHARWAR DRY/3/BAV92
EYT2012-13	6567114	PFAU/SERI.1B//AMAD/3/WAXWING*2/4/FRNCLN
EYT2012-13	6692027	BAVIS//ATTILA/PASTOR
EYT2012-13	6692028	BAVIS//ATTILA/PASTOR
EYT2012-13	6692029	BAVIS//ATTILA/PASTOR
EYT2012-13	6680063	CHYAK1/PRL/4/WHEAR/KIRITATI/3/C80.1/3*BATAVIA//2*WBLL1
EYT2012-13	6567327	PAURAQ//ND643/2*WBLL1/3/PAURAQUE #1
EYT2012-13	6567326	PAURAQ//KIRITATI/2*TRCH/3/PAURAQUE #1
EYT2012-13	6567324	PAURAQ//KIRITATI/2*TRCH/3/PAURAQUE #1
EYT2012-13	6567322	PAURAQ//KIRITATI/2*TRCH/3/PAURAQUE #1
EYT2012-13	6681164	KIRITATI//HUW234+LR34/PRINIA/3/CHONTE/5/PRL/2*PASTOR/4/CHOIX/STAR/3/HE1/3*CNO79//2*SERI
EYT2012-13	6681165	KIRITATI//HUW234+LR34/PRINIA/3/CHONTE/5/PRL/2*PASTOR/4/CHOIX/STAR/3/HE1/3*CNO79//2*SERI
EYT2012-13	6692041	CROC_1/AE.SQUARROSA (213)//PGO/10/ATTILA*2/9/KT/BAGE//FN/U/3/BZA/4/TRM/5/ALDAN/6/SERI/7/VEE#10/8/OPATA/11/PAURAQUE #1
EYT2012-13	6692044	CROC_1/AE.SQUARROSA (213)//PGO/10/ATTILA*2/9/KT/BAGE//FN/U/3/BZA/4/TRM/5/ALDAN/6/SERI/7/VEE#10/8/OPATA/11/PAURAQUE #1
EYT2012-13	6680008	WHEAR/KUKUNA/3/C80.1/3*BATAVIA//2*WBLL1*2/5/KIRITATI/4/2*SERI.1B*2/3/KAUZ*2/BOW//KAUZ
EYT2012-13	6681576	WHEAR/KUKUNA/3/C80.1/3*BATAVIA//2*WBLL1*2/4/ND643/2*WBLL1
EYT2012-13	6567424	FRANCOLIN #1*2//ND643/2*WBLL1
EYT2012-13	6567425	FRANCOLIN #1/CHONTE//FRNCLN
EYT2012-13	6691147	ATTILA/3/WEAVER*2/TSC//WEAVER/4/MILAN/KAUZ//DHARWAR DRY/3/BAV92
EYT2012-13	6691149	ATTILA/3/WEAVER*2/TSC//WEAVER/4/MILAN/KAUZ//DHARWAR DRY/3/BAV92
EYT2012-13	6681582	WHEAR/KUKUNA/3/C80.1/3*BATAVIA//2*WBLL1*2/4/ND643/2*WBLL1
EYT2012-13	6567430	FRNCLN*2/BECARD
EYT2012-13	6681105	DANPHE #1//ND643/2*WBLL1/3/DANPHE
EYT2012-13	6691370	RAC 1192/11/2*CROC_1/AE.SQUARROSA (213)//PGO/10/ATTILA*2/9/KT/BAGE//FN/U/3/BZA/4/TRM/5/ALDAN/6/SERI/7/VEE#10/8/OPATA
EYT2012-13	6567433	FRNCLN/4/WHEAR/KIRITATI/3/C80.1/3*BATAVIA//2*WBLL1/5/FRANCOLIN #1
EYT2012-13	6691133	BAVIS/MUNAL
EYT2012-13	6681110	DANPHE #1//ND643/2*WBLL1/3/DANPHE
EYT2012-13	6681594	WHEAR/KUKUNA/3/C80.1/3*BATAVIA//2*WBLL1/4/PAURAQUE #1/5/WHEAR/KUKUNA/3/C80.1/3*BATAVIA//2*WBLL1
EYT2012-13	6680023	WHEAR/KUKUNA/3/C80.1/3*BATAVIA//2*WBLL1/4/CHONTE/5/WHEAR/KUKUNA/3/C80.1/3*BATAVIA//2*WBLL1
EYT2012-13	6681591	WHEAR/KUKUNA/3/C80.1/3*BATAVIA//2*WBLL1/4/PAURAQUE #1/5/WHEAR/KUKUNA/3/C80.1/3*BATAVIA//2*WBLL1
EYT2012-13	6681113	DANPHE #1//ND643/2*WBLL1/3/DANPHE
EYT2012-13	6566798	DANPHE/3/MILAN/S87230//BAV92/4/DANPHE #1
EYT2012-13	6567405	WAXWING*2/TUKURU//KISKADEE #1/3/FRNCLN
EYT2012-13	6692251	PASTOR//HXL7573/2*BAU/3/WBLL1/4/MUNAL
EYT2012-13	6566799	DANPHE/3/MILAN/S87230//BAV92/4/DANPHE #1
EYT2012-13	6567401	WAXWING*2/TUKURU//2*FRNCLN
EYT2012-13	6692014	BAVIS/MUNAL
EYT2012-13	6567409	FRNCLN/DANPHE//FRANCOLIN #1
EYT2012-13	6567407	FRNCLN/QUAIU//FRANCOLIN #1
EYT2012-13	6680034	WHEAR/KUKUNA/3/C80.1/3*BATAVIA//2*WBLL1/4/PAURAQUE #1/5/WHEAR/KUKUNA/3/C80.1/3*BATAVIA//2*WBLL1
EYT2012-13	6691151	ATTILA/3/WEAVER*2/TSC//WEAVER/4/DANPHE #1
EYT2012-13	6567411	FRNCLN/DANPHE//FRANCOLIN #1
EYT2012-13	6691154	ATTILA/3/WEAVER*2/TSC//WEAVER/4/PAURAQUE #1
EYT2012-13	6692002	BAVIS//ATTILA*2/PBW65
EYT2012-13	6566562	CROC_1/AE.SQUARROSA (205)//BORL95/3/PRL/SARA//TSI/VEE#5/4/FRET2/5/CHONTE/6/INQALAB 91*2/KUKUNA//KIRITATI
EYT2012-13	6679695	MILAN/S87230//BAV92/3/DANPHE #1/4/C80.1/3*BATAVIA//2*WBLL1/3/C80.1/3*QT4522//2*PASTOR
EYT2012-13	6566775	KACHU*2/CHONTE
EYT2012-13	6690490	92.001E7.32.5/SLVS/3/KA/NAC//TRCH
EYT2012-13	6692430	CPI8/GEDIZ/3/GOO//ALB/CRA/4/AE.SQUARROSA (409)/5/2*ATTILA/PASTOR
EYT2012-13	6691100	NS-732/HER/3/PRL/SARA//TSI/VEE#5/4/FRET2/5/PAURAQUE #1
EYT2012-13	6690497	92.001E7.32.5/SLVS//ROLF07
EYT2012-13	6691103	BAVIS//ATTILA*2/PBW65
EYT2012-13	6691101	NS-732/HER/3/PRL/SARA//TSI/VEE#5/4/FRET2/5/MUNAL
EYT2012-13	6691344	SLVS/PASTOR//CETA/AE.SQUARROSA (895)/4/92.001E7.32.5/3/PRL/SARA//TSI/VEE#5/5/ATTILA/3/WEAVER*2/TSC//WEAVER
EYT2012-13	6566781	KACHU*2/FRNCLN
EYT2012-13	6681300	PRL/2*PASTOR/4/CHOIX/STAR/3/HE1/3*CNO79//2*SERI/5/KIRITATI/2*TRCH/6/PRL/2*PASTOR/4/CHOIX/STAR/3/HE1/3*CNO79//2*SERI
EYT2012-13	6681301	PRL/2*PASTOR/4/CHOIX/STAR/3/HE1/3*CNO79//2*SERI/5/KIRITATI/2*TRCH/6/PRL/2*PASTOR/4/CHOIX/STAR/3/HE1/3*CNO79//2*SERI
EYT2012-13	6681302	PRL/2*PASTOR/4/CHOIX/STAR/3/HE1/3*CNO79//2*SERI/5/KIRITATI/2*TRCH/6/PRL/2*PASTOR/4/CHOIX/STAR/3/HE1/3*CNO79//2*SERI
EYT2012-13	6681303	PRL/2*PASTOR/4/CHOIX/STAR/3/HE1/3*CNO79//2*SERI/5/KIRITATI/2*TRCH/6/PRL/2*PASTOR/4/CHOIX/STAR/3/HE1/3*CNO79//2*SERI
EYT2012-13	6681545	WBLL1/KUKUNA//TACUPETO F2001*2/3/FRANCOLIN #1
EYT2012-13	6566544	CROSBILL #1//KIRITATI/2*WBLL1/3/BECARD
EYT2012-13	6566543	CROSBILL #1//KIRITATI/2*WBLL1/3/BECARD
EYT2012-13	6566784	KACHU*2/FRNCLN
EYT2012-13	6690483	92.001E7.32.5/SLVS//ATTILA/PASTOR
EYT2012-13	6692421	W15.92/4/PASTOR//HXL7573/2*BAU/3/WBLL1/5/MILAN/KAUZ//DHARWAR DRY/3/BAV92
EYT2012-13	6692425	W15.92/4/PASTOR//HXL7573/2*BAU/3/WBLL1/5/MILAN/KAUZ//DHARWAR DRY/3/BAV92
EYT2012-13	6691337	CACUKE/BAVIS
EYT2012-13	6692209	FALCIN/AE.SQUARROSA (312)/3/THB/CEP7780//SHA4/LIRA/4/FRET2/5/MUU/6/MILAN/KAUZ//DHARWAR DRY/3/BAV92
EYT2012-13	6681317	PAURAQ//ND643/2*WBLL1/3/PAURAQUE #1
EYT2012-13	6681312	PAURAQ//KIRITATI/2*TRCH/3/PAURAQUE #1
EYT2012-13	6691360	RAC 1192/4/2*ATTILA/3/WEAVER*2/TSC//WEAVER
EYT2012-13	6691368	GLADIUS/2*BAVIS
EYT2012-13	6567609	WBLL1/KUKUNA//TACUPETO F2001*2/3/FRANCOLIN #1
EYT2012-13	6681562	KISKADEE #1/DANPHE/4/WHEAR/KIRITATI/3/C80.1/3*BATAVIA//2*WBLL1
EYT2012-13	6681322	PAURAQ//ND643/2*WBLL1/3/PAURAQUE #1
EYT2012-13	6681565	KISKADEE #1*2/3/ND643//2*PRL/2*PASTOR
EYT2012-13	6681324	PAURAQ//ND643/2*WBLL1/3/PAURAQUE #1
EYT2012-13	6566764	KACHU*2/4/PFAU/SERI.1B//AMAD/3/WAXWING
EYT2012-13	6567614	WBLL1/KUKUNA//TACUPETO F2001*2/3/FRANCOLIN #1
EYT2012-13	6567612	WBLL1/KUKUNA//TACUPETO F2001*2/3/FRANCOLIN #1
EYT2012-13	6681319	PAURAQ//ND643/2*WBLL1/3/PAURAQUE #1
EYT2012-13	6691350	AGT YOUNG/3/2*KA/NAC//TRCH
EYT2012-13	6692204	FALCIN/AE.SQUARROSA (312)/3/THB/CEP7780//SHA4/LIRA/4/FRET2/5/MUU/6/MILAN/KAUZ//DHARWAR DRY/3/BAV92
EYT2012-13	6692205	FALCIN/AE.SQUARROSA (312)/3/THB/CEP7780//SHA4/LIRA/4/FRET2/5/MUU/6/MILAN/KAUZ//DHARWAR DRY/3/BAV92
EYT2012-13	6692206	FALCIN/AE.SQUARROSA (312)/3/THB/CEP7780//SHA4/LIRA/4/FRET2/5/MUU/6/MILAN/KAUZ//DHARWAR DRY/3/BAV92
EYT2012-13	6691359	RAC 1192/4/2*ATTILA/3/WEAVER*2/TSC//WEAVER
EYT2012-13	6678562	SAAR/WBLL1//WAXWING*2/TUKURU/3/WHEAR//2*PRL/2*PASTOR
EYT2012-13	6567828	YAR/AE.SQUARROSA (783)/4/GOV/AZ//MUS/3/SARA/5/MYNA/VUL//JUN/6/BECARD/7/BECARD
EYT2012-13	6679657	KIRITATI//HUW234+LR34/PRINIA/3/FRANCOLIN #1/4/BAJ #1
EYT2012-13	6679899	FRANCOLIN #1*2//ND643/2*WBLL1
EYT2012-13	6691529	VEE/MJI//2*TUI/3/PASTOR/4/BERKUT/5/BAVIS
EYT2012-13	6690438	TC870344/GUI//TEMPORALERA M 87/AGR/3/2*WBLL1/4/ATTILA/PASTOR
EYT2012-13	6691528	VEE/MJI//2*TUI/3/PASTOR/4/BERKUT/5/BAVIS
EYT2012-13	6678574	TAM200/PASTOR//TOBA97/3/FRNCLN/4/WHEAR//2*PRL/2*PASTOR
EYT2012-13	6679665	KIRITATI//PBW65/2*SERI.1B/4/2*WHEAR/KUKUNA/3/C80.1/3*BATAVIA//2*WBLL1
EYT2012-13	6678576	TAM200/PASTOR//TOBA97/3/FRNCLN/4/WHEAR//2*PRL/2*PASTOR
EYT2012-13	6679664	KIRITATI//PBW65/2*SERI.1B/4/2*WHEAR/KUKUNA/3/C80.1/3*BATAVIA//2*WBLL1
EYT2012-13	6691778	NS-732/HER/3/PRL/SARA//TSI/VEE#5/4/FRET2/5/2*MUNAL
EYT2012-13	6690445	TC870344/GUI//TEMPORALERA M 87/AGR/3/2*WBLL1/5/CROC_1/AE.SQUARROSA (205)//BORL95/3/PRL/SARA//TSI/VEE#5/4/FRET2
EYT2012-13	6691319	PASTOR/3/VEE#5//DOVE/BUC/4/DANPHE #1
EYT2012-13	6691320	PASTOR/3/VEE#5//DOVE/BUC/4/DANPHE #1
EYT2012-13	6679675	KIRITATI/2*WBLL1//KIRITATI/2*TRCH/7/PASTOR/KAUZ/6/CNDO/R143//ENTE/MEXI_2/3/AEGILOPS SQUARROSA (TAUS)/4/WEAVER/5/2*KAUZ
EYT2012-13	6691327	VORB/MUNAL
EYT2012-13	6690479	TC870344/GUI//TEMPORALERA M 87/AGR/3/2*WBLL1/4/MUNAL
EYT2012-13	6690478	TC870344/GUI//TEMPORALERA M 87/AGR/3/2*WBLL1/4/PAURAQUE #1
EYT2012-13	6690462	TC870344/GUI//TEMPORALERA M 87/AGR/3/2*WBLL1/4/KA/NAC//TRCH
EYT2012-13	6692401	HGO94.9.1.37//2*ATTILA/PASTOR
EYT2012-13	6679686	MILAN/S87230//BAV92/3/DANPHE #1/4/C80.1/3*BATAVIA//2*WBLL1/3/C80.1/3*QT4522//2*PASTOR
EYT2012-13	6690468	TC870344/GUI//TEMPORALERA M 87/AGR/3/2*WBLL1/4/PANDORA
EYT2012-13	6692404	HGO94.9.1.37//2*ATTILA/PASTOR
EYT2012-13	6690469	TC870344/GUI//TEMPORALERA M 87/AGR/3/2*WBLL1/4/PANDORA
EYT2012-13	6679852	PAURAQ/4/WHEAR/KUKUNA/3/C80.1/3*BATAVIA//2*WBLL1/5/PAURAQUE #1
EYT2012-13	6691983	TOB/ERA//TOB/CNO67/3/PLO/4/VEE#5/5/KAUZ/6/FRET2/7/MUNAL
EYT2012-13	6690893	KA/NAC//TRCH*2/3/ATTILA/PASTOR
EYT2012-13	6691746	GLADIUS/3/2*KA/NAC//TRCH
EYT2012-13	6679864	MUNAL*2//ND643/2*WBLL1
EYT2012-13	6691518	ATTILA*2/PBW65//BERKUT/3/KA/NAC//TRCH
EYT2012-13	6679874	FRNCLN/QUAIU//FRANCOLIN #1
EYT2012-13	6691526	VEE/MJI//2*TUI/3/PASTOR/4/BERKUT/5/BAVIS
EYT2012-13	6691523	VEE/MJI//2*TUI/3/PASTOR/4/BERKUT/5/BAVIS
EYT2012-13	6691749	GLADIUS/2*BAVIS
EYT2012-13	6679883	FRANCOLIN #1*2//ND643/2*WBLL1
EYT2012-13	6679647	KIRITATI//HUW234+LR34/PRINIA/4/WHEAR/KUKUNA/3/C80.1/3*BATAVIA//2*WBLL1/5/HUW234+LR34/PRINIA//PFAU/WEAVER
EYT2012-13	6690849	BAVIS*2//ATTILA*2/PBW65
EYT2012-13	6679825	PRL/2*PASTOR/4/CHOIX/STAR/3/HE1/3*CNO79//2*SERI/5/KIRITATI/2*TRCH/6/PRL/2*PASTOR/4/CHOIX/STAR/3/HE1/3*CNO79//2*SERI
EYT2012-13	6690870	ATTILA/3/WEAVER*2/TSC//WEAVER*2/4/ATTILA*2/PBW65
EYT2012-13	6691721	BAVIS/3/ATTILA/BAV92//PASTOR/5/CROC_1/AE.SQUARROSA (205)//BORL95/3/PRL/SARA//TSI/VEE#5/4/FRET2
EYT2012-13	6690858	BAVIS*2/MUNAL
EYT2012-13	6690859	BAVIS*2/MUNAL
EYT2012-13	6679848	PAURAQ//ND643/2*WBLL1/3/PAURAQUE #1
EYT2012-13	6690865	BAVIS*2//ATTILA/PASTOR
EYT2012-13	6690863	BAVIS*2//ATTILA/PASTOR
EYT2012-13	6690864	BAVIS*2//ATTILA/PASTOR
EYT2012-13	6681094	DANPHE #1*2//KIRITATI/2*TRCH
EYT2012-13	6681095	DANPHE #1*2//KIRITATI/2*TRCH
EYT2012-13	6681093	DANPHE #1*2//KIRITATI/2*TRCH
EYT2012-13	6567071	PFAU/MILAN/5/CHEN/AEGILOPS SQUARROSA (TAUS)//BCN/3/VEE#7/BOW/4/PASTOR/6/2*BAVIS #1
EYT2012-13	6691914	FALCIN/AE.SQUARROSA (312)/3/THB/CEP7780//SHA4/LIRA/4/FRET2/5/DANPHE #1/11/CROC_1/AE.SQUARROSA (213)//PGO/10/ATTILA*2/9/KT/BAGE//FN/U/3/BZA/4/TRM/5/ALDAN/6/SERI/7/VEE#10/8/OPATA
EYT2012-13	6691909	FALCIN/AE.SQUARROSA (312)/3/THB/CEP7780//SHA4/LIRA/4/FRET2/5/ATTILA*2/PBW65/6/MILAN/KAUZ//DHARWAR DRY/3/BAV92
EYT2012-13	6567293	TUKURU//BAV92/RAYON/3/DANPHE/4/DANPHE
EYT2012-13	6567294	TUKURU//BAV92/RAYON/3/DANPHE/4/DANPHE
EYT2012-13	6679806	MUU*2/PAURAQ
EYT2012-13	6681297	PRL/2*PASTOR/4/CHOIX/STAR/3/HE1/3*CNO79//2*SERI/5/KIRITATI/2*TRCH/6/PRL/2*PASTOR/4/CHOIX/STAR/3/HE1/3*CNO79//2*SERI
EYT2012-13	6681053	HUW234+LR34/PRINIA//KRONSTAD F2004*2/4/WHEAR/KUKUNA/3/C80.1/3*BATAVIA//2*WBLL1
EYT2012-13	6567022	ND643/2*WBLL1//KIRITATI/2*TRCH/3/ND643/2*WBLL1
EYT2012-13	6567268	SERI.1B*2/3/KAUZ*2/BOW//KAUZ/4/KRONSTAD F2004/5/MUNAL/6/MUNAL #1
EYT2012-13	6567026	ND643/2*WBLL1/5/PRL/2*PASTOR/4/CHOIX/STAR/3/HE1/3*CNO79//2*SERI/6/PRL/2*PASTOR/4/CHOIX/STAR/3/HE1/3*CNO79//2*SERI
EYT2012-13	6567274	BAVIS/2*FRANCOLIN #1
EYT2012-13	6681069	KACHU*2/KISKADEE #1
EYT2012-13	6681072	DANPHE/5/KIRITATI/4/2*SERI.1B*2/3/KAUZ*2/BOW//KAUZ/6/DANPHE #1
EYT2012-13	6681075	DANPHE/5/KIRITATI/4/2*SERI.1B*2/3/KAUZ*2/BOW//KAUZ/6/DANPHE #1
EYT2012-13	6567480	BAJ #1*2/KISKADEE #1
EYT2012-13	6567003	MILAN/S87230//BAV92/3/MUNAL/4/MUNAL #1
EYT2012-13	6681070	KIRITATI//2*ATTILA*2/PASTOR/3/2*PFAU/WEAVER*2//CHAPIO
EYT2012-13	6681080	DANPHE/5/KIRITATI/4/2*SERI.1B*2/3/KAUZ*2/BOW//KAUZ/6/DANPHE #1
EYT2012-13	6681082	DANPHE/5/KIRITATI/4/2*SERI.1B*2/3/KAUZ*2/BOW//KAUZ/6/DANPHE #1
EYT2012-13	6681250	PFAU/SERI.1B//AMAD/3/WAXWING*2/4/ND643/2*WBLL1
EYT2012-13	6681493	BAJ #1*2/KISKADEE #1
EYT2012-13	6681257	PFAU/SERI.1B//AMAD/3/WAXWING*2/4/WHEAR/VIVITSI//WHEAR
EYT2012-13	6692151	W15.92/4/PASTOR//HXL7573/2*BAU/3/WBLL1/5/MUNAL
EYT2012-13	6691060	KRICHAUFF/WBLL1/6/CNDO/R143//ENTE/MEXI_2/3/AEGILOPS SQUARROSA (TAUS)/4/OCI/5/PASTOR/7/2*KA/NAC//TRCH
EYT2012-13	6567465	BAJ #1/4/PFAU/SERI.1B//AMAD/3/WAXWING/5/WAXWING*2/KRONSTAD F2004
EYT2012-13	6692154	W15.92/4/PASTOR//HXL7573/2*BAU/3/WBLL1/5/MUNAL
EYT2012-13	6681263	PFAU/WEAVER*2//CHAPIO*2/3/WBLL1*2/BRAMBLING
EYT2012-13	6681267	PFAU/WEAVER*2//CHAPIO*2/3/WBLL1*2/BRAMBLING
EYT2012-13	6681269	PFAU/WEAVER*2//CHAPIO*2/3/WBLL1*2/BRAMBLING
EYT2012-13	6691293	W15.92/4/PASTOR//HXL7573/2*BAU/3/WBLL1/5/MUU
EYT2012-13	6691294	W15.92/4/PASTOR//HXL7573/2*BAU/3/WBLL1/5/ATTILA/BAV92//PASTOR
EYT2012-13	6692141	W15.92/4/PASTOR//HXL7573/2*BAU/3/WBLL1/5/MUU
EYT2012-13	6691292	W15.92/4/PASTOR//HXL7573/2*BAU/3/WBLL1/5/MUU
EYT2012-13	6692144	W15.92/4/PASTOR//HXL7573/2*BAU/3/WBLL1/5/MUU
EYT2012-13	6681275	PFAU/WEAVER*2//CHAPIO*2/3/WBLL1*2/BRAMBLING
EYT2012-13	6566596	FRET2*2/BRAMBLING//KIRITATI/2*TRCH/3/FRET2/TUKURU//FRET2
EYT2012-13	6566595	FRET2*2/BRAMBLING*2//DANPHE #1
EYT2012-13	6681044	HUW234+LR34/PRINIA//KRONSTAD F2004*2/3/KISKADEE #1
EYT2012-13	6681041	HUW234+LR34/PRINIA//PFAU/WEAVER/3/FRANCOLIN #1/4/HUW234+LR34/PRINIA//KRONSTAD F2004
EYT2012-13	6692169	PASTOR//MILAN/KAUZ/3/BAV92/4/PAURAQUE #1
EYT2012-13	6682781	MILAN/S87230//BAV92*2/3/TAM200/TURACO
EYT2012-13	6683870	KIRITATI/4/2*SERI.1B*2/3/KAUZ*2/BOW//KAUZ/5/2*MUNAL
EYT2012-13	6682784	MILAN/S87230//BAV92*2/3/TAM200/TURACO
EYT2012-13	6568875	BAJ #1/3/2*HUW234+LR34/PRINIA//PFAU/WEAVER
EYT2012-13	6692351	SOKOLL/3/PASTOR//HXL7573/2*BAU/4/92.001E7.32.5/SLVS
EYT2012-13	6692359	WBLL4//OAX93.24.35/WBLL1/3/BAV92/SERI
EYT2012-13	6682795	MILAN/S87230//BAV92*2/3/HARIL #1
EYT2012-13	6568406	QUAIU//2*BRBT1*2/KIRITATI
EYT2012-13	6568885	BAJ #1*2/3/KIRITATI//HUW234+LR34/PRINIA
EYT2012-13	6568401	BABAX/LR42//BABAX*2/3/PAVON 7S3, +LR47/4/2*MUU
EYT2012-13	6692343	SOKOLL/3/PASTOR//HXL7573/2*BAU/4/SOKOLL/WBLL1
EYT2012-13	6568400	BABAX/LR42//BABAX*2/3/PAVON 7S3, +LR47/4/2*MUU
EYT2012-13	6692346	SOKOLL/3/PASTOR//HXL7573/2*BAU/5/CROC_1/AE.SQUARROSA (205)//BORL95/3/PRL/SARA//TSI/VEE#5/4/FRET2
EYT2012-13	6692345	SOKOLL/3/PASTOR//HXL7573/2*BAU/4/SOKOLL/WBLL1
EYT2012-13	6692348	SOKOLL/3/PASTOR//HXL7573/2*BAU/4/1447/PASTOR//KRICHAUFF
EYT2012-13	6683893	MUU*2/KBIRD
EYT2012-13	6682564	WBLL1*2/4/YACO/PBW65/3/KAUZ*2/TRAP//KAUZ*2/5/KIRITATI/2*TRCH
EYT2012-13	6682569	WBLL1*2/4/YACO/PBW65/3/KAUZ*2/TRAP//KAUZ*2/5/KIRITATI/2*TRCH
EYT2012-13	6683897	MUU*2/KBIRD
EYT2012-13	6692372	PUB94.15.1.12/FRTL//BAV92/SERI
EYT2012-13	6568857	FRNCLN*2/4/WHEAR/KUKUNA/3/C80.1/3*BATAVIA//2*WBLL1
EYT2012-13	6692377	PUB94.15.1.12/FRTL//BAV92/SERI
EYT2012-13	6682570	WBLL1*2/4/YACO/PBW65/3/KAUZ*2/TRAP//KAUZ*2/5/KIRITATI/2*TRCH
EYT2012-13	6682577	WBLL1*2/BRAMBLING//DANPHE #1/3/WBLL1*2/BRAMBLING
EYT2012-13	6682337	THELIN/3/BABAX/LR42//BABAX/4/BABAX/LR42//BABAX*2/5/KIRITATI/2*TRCH
EYT2012-13	6682745	DANPHE #1*2/SHORTENED SR26 TRANSLOCATION
EYT2012-13	6682743	DANPHE #1*2/SHORTENED SR26 TRANSLOCATION
EYT2012-13	6682738	DANPHE #1*2/BAVIS #1
EYT2012-13	6692316	SOKOLL/3/PASTOR//HXL7573/2*BAU/4/ASTREB
EYT2012-13	6682752	DANPHE #1*2/CHYAK
EYT2012-13	6683842	KAUZ*2/MNV//KAUZ/3/MILAN/4/BAV92*2/5/MUU
EYT2012-13	6682753	DANPHE #1*2/CHYAK
EYT2012-13	6568844	GRACK/2*CHYAK
EYT2012-13	6568842	GRACK*2/CHYAK
EYT2012-13	6692303	SOKOLL/3/PASTOR//HXL7573/2*BAU/4/PARUS/PASTOR
EYT2012-13	6692300	SOKOLL/3/PASTOR//HXL7573/2*BAU/4/PARUS/PASTOR
EYT2012-13	6692306	SOKOLL/3/PASTOR//HXL7573/2*BAU/4/PARUS/PASTOR
EYT2012-13	6568849	GRACK/2*CHYAK
EYT2012-13	6568847	GRACK/2*CHYAK
EYT2012-13	6682521	BAJ #1/3/KIRITATI//HUW234+LR34/PRINIA/4/KIRITATI//HUW234+LR34/PRINIA
EYT2012-13	6682522	BAJ #1/3/KIRITATI//HUW234+LR34/PRINIA/4/KIRITATI//HUW234+LR34/PRINIA
EYT2012-13	6683854	DANPHE #1*2/GRACK
EYT2012-13	6567963	PFAU/SERI.1B//AMAD/3/WAXWING*2/4/DANPHE #1
EYT2012-13	6692331	SOKOLL/3/PASTOR//HXL7573/2*BAU/5/CROC_1/AE.SQUARROSA (205)//BORL95/3/PRL/SARA//TSI/VEE#5/4/FRET2
EYT2012-13	6692338	SOKOLL/3/PASTOR//HXL7573/2*BAU/4/SOKOLL/WBLL1
EYT2012-13	6682538	WBLL1*2/4/YACO/PBW65/3/KAUZ*2/TRAP//KAUZ*2/5/KIRITATI/2*TRCH
EYT2012-13	6683869	KIRITATI/4/2*SERI.1B*2/3/KAUZ*2/BOW//KAUZ/5/2*MUNAL
EYT2012-13	6692325	SOKOLL/3/PASTOR//HXL7573/2*BAU/4/WBLL4//OAX93.24.35/WBLL1
EYT2012-13	6692326	SOKOLL/3/PASTOR//HXL7573/2*BAU/4/WBLL4//OAX93.24.35/WBLL1
EYT2012-13	6692327	SOKOLL/3/PASTOR//HXL7573/2*BAU/4/WBLL4//OAX93.24.35/WBLL1
EYT2012-13	6682702	QUAIU #2/3/2*KIRITATI//HUW234+LR34/PRINIA
EYT2012-13	6690570	VEE/MJI//2*TUI/3/PASTOR/4/BERKUT/5/KA/NAC//TRCH
EYT2012-13	6690572	VEE/MJI//2*TUI/3/PASTOR/4/BERKUT/5/KA/NAC//TRCH
EYT2012-13	6690571	VEE/MJI//2*TUI/3/PASTOR/4/BERKUT/5/KA/NAC//TRCH
EYT2012-13	6690575	VEE/MJI//2*TUI/3/PASTOR/4/BERKUT/5/KA/NAC//TRCH
EYT2012-13	6567947	MILAN/S87230//BAV92/3/PAURAQ/4/PAURAQUE #1
EYT2012-13	6690578	VEE/MJI//2*TUI/3/PASTOR/4/BERKUT/5/PAURAQ
EYT2012-13	6567946	MILAN/S87230//BAV92/3/PAURAQ/4/PAURAQUE #1
EYT2012-13	6567959	PFAU/SERI.1B//AMAD/3/WAXWING/4/2*DANPHE #1
EYT2012-13	6690569	VEE/MJI//2*TUI/3/PASTOR/4/BERKUT/5/KA/NAC//TRCH
EYT2012-13	6690568	VEE/MJI//2*TUI/3/PASTOR/4/BERKUT/11/CROC_1/AE.SQUARROSA (213)//PGO/10/ATTILA*2/9/KT/BAGE//FN/U/3/BZA/4/TRM/5/ALDAN/6/SERI/7/VEE#10/8/OPATA
EYT2012-13	6682716	CHIBIA//PRLII/CM65531/3/FISCAL*2/4/TAM200/TURACO
EYT2012-13	6682717	CHIBIA//PRLII/CM65531/3/FISCAL*2/4/TAM200/TURACO
EYT2012-13	6690599	SOKOLL/WBLL1//ATTILA/PASTOR
EYT2012-13	6682737	DANPHE #1*2/BAVIS #1
EYT2012-13	6683822	TACUPETO F2001*2/BRAMBLING/3/KIRITATI//PBW65/2*SERI.1B/4/ND643/2*WBLL1
EYT2012-13	6567930	MILAN/S87230//BAV92*2/3/DANPHE #1
EYT2012-13	6567939	MILAN/S87230//BAV92*2/3/CHONTE
EYT2012-13	6569082	PFAU/SERI.1B//AMAD/3/WAXWING*2/4/TAM200/TUI
EYT2012-13	6684083	CHIBIA//PRLII/CM65531/3/FISCAL*2/4/NIINI #1
EYT2012-13	6567906	CHIBIA//PRLII/CM65531/3/SKAUZ/BAV92*2/4/WBLL1*2/BRAMBLING
EYT2012-13	6682907	FRNCLN/3/ND643//2*PRL/2*PASTOR/4/FRANCOLIN #1
EYT2012-13	6682903	FRNCLN/3/ND643//2*PRL/2*PASTOR/4/FRANCOLIN #1
EYT2012-13	6682905	FRNCLN/3/ND643//2*PRL/2*PASTOR/4/FRANCOLIN #1
EYT2012-13	6691611	MILAN/MUNIA/3/PASTOR//MUNIA/ALTAR 84/4/MILAN/DUCULA/5/MUU
EYT2012-13	6682921	BAJ #1*2//ND643/2*WBLL1
EYT2012-13	6682922	BAJ #1*2//ND643/2*WBLL1
EYT2012-13	6682916	FRNCLN/3/KIRITATI//HUW234+LR34/PRINIA/4/FRANCOLIN #1
EYT2012-13	6690780	MILAN/MUNIA/3/PASTOR//MUNIA/ALTAR 84/4/MILAN/DUCULA/5/KA/NAC//TRCH
EYT2012-13	6690725	NING MAI 96035/FINSI//HEILO/3/ATTILA/PASTOR
EYT2012-13	6684042	MUNAL*2/WESTONIA
EYT2012-13	6684045	MUNAL*2/WESTONIA
EYT2012-13	6684041	MUNAL*2/WESTONIA
EYT2012-13	6684069	QUAIU #2*2/TINKIO #1
EYT2012-13	6690747	KAMB2/PANDION/4/ATTILA/3/WEAVER*2/TSC//WEAVER
EYT2012-13	6569147	BAJ #1*2/TINKIO #1
EYT2012-13	6684073	QUAIU #2*2/TINKIO #1
EYT2012-13	6690743	NING MAI 96035/FINSI//HEILO/4/YANG87-142//SHA4/CHIL/3/TNMU
EYT2012-13	6682066	CHEWINK #1/FRNCLN
EYT2012-13	6684003	WHEAR/KUKUNA/3/C80.1/3*BATAVIA//2*WBLL1*2/4/KBIRD
EYT2012-13	6682064	CHEWINK #1/FRNCLN
EYT2012-13	6684001	WHEAR/KUKUNA/3/C80.1/3*BATAVIA//2*WBLL1*2/4/KBIRD
EYT2012-13	6684000	WHEAR/KUKUNA/3/C80.1/3*BATAVIA//2*WBLL1*2/4/KBIRD
EYT2012-13	6682073	CHYAK/CHONTE
EYT2012-13	6682071	WHEAR/VIVITSI//WHEAR/3/FRNCLN
EYT2012-13	6684024	WHEAR/KUKUNA/3/C80.1/3*BATAVIA//2*WBLL1*2/4/KINGBIRD #1
EYT2012-13	6684036	MUNAL*2/WESTONIA
EYT2012-13	6684034	MUNAL*2/WESTONIA
EYT2012-13	6684039	MUNAL*2/WESTONIA
EYT2012-13	6682267	PFAU/SERI.1B//AMAD/3/WAXWING*2/4/INQALAB 91*2/KUKUNA//KIRITATI
EYT2012-13	6684208	FRNCLN*2//TAM200/TUI
EYT2012-13	6684207	FRNCLN*2//TAM200/TUI
EYT2012-13	6684210	FRNCLN/NIINI #1//FRANCOLIN #1
EYT2012-13	6568484	TACUPETO F2001*2/BRAMBLING/3/KIRITATI//PBW65/2*SERI.1B/4/TACUPETO F2001*2/BRAMBLING
EYT2012-13	6568699	PRL/2*PASTOR/4/CHOIX/STAR/3/HE1/3*CNO79//2*SERI*2/5/CHONTE
EYT2012-13	6682464	FRNCLN*2/4/WHEAR/KUKUNA/3/C80.1/3*BATAVIA//2*WBLL1
EYT2012-13	6682460	FRNCLN*2/4/WHEAR/KUKUNA/3/C80.1/3*BATAVIA//2*WBLL1
EYT2012-13	6692273	PASTOR//HXL7573/2*BAU/3/ATTILA/3*BCN/4/SOKOLL/3/PASTOR//HXL7573/2*BAU
EYT2012-13	6692271	PASTOR//HXL7573/2*BAU/3/ATTILA/3*BCN/4/SOKOLL/3/PASTOR//HXL7573/2*BAU
EYT2012-13	6568437	CROC_1/AE.SQUARROSA (205)//BORL95/3/PRL/SARA//TSI/VEE#5/4/FRET2/5/2*DANPHE #1
EYT2012-13	6692276	PASTOR//HXL7573/2*BAU/3/ATTILA/3*BCN/4/SOKOLL/3/PASTOR//HXL7573/2*BAU
EYT2012-13	6682470	FRNCLN*2/4/WHEAR/KUKUNA/3/C80.1/3*BATAVIA//2*WBLL1
EYT2012-13	6682230	DANPHE #1*2/GRACK
EYT2012-13	6568442	CROC_1/AE.SQUARROSA (205)//BORL95/3/PRL/SARA//TSI/VEE#5/4/FRET2*2/5/KIRITATI/2*TRCH
EYT2012-13	6568680	MUU/FRNCLN//FRANCOLIN #1
EYT2012-13	6568446	ELVIRA/5/CNDO/R143//ENTE/MEXI75/3/AE.SQ/4/2*OCI/6/2*KISKADEE #1
EYT2012-13	6692267	PASTOR//HXL7573/2*BAU/3/ATTILA/3*BCN/4/SOKOLL/3/PASTOR//HXL7573/2*BAU
EYT2012-13	6682480	FRNCLN*2/KINGBIRD #1
EYT2012-13	6682488	BAJ #1*2/KBIRD
EYT2012-13	6568414	QUAIU/3/KIRITATI//PBW65/2*SERI.1B/4/DANPHE #1
EYT2012-13	6692298	SOKOLL/3/PASTOR//HXL7573/2*BAU/4/PARUS/PASTOR
EYT2012-13	6692296	SOKOLL/3/PASTOR//HXL7573/2*BAU/4/PARUS/PASTOR
EYT2012-13	6568427	QUAIU/MUNAL//QUAIU #2
EYT2012-13	6692283	PASTOR//HXL7573/2*BAU/3/ATTILA/3*BCN/4/SOKOLL/3/PASTOR//HXL7573/2*BAU
EYT2012-13	6568423	QUAIU #2/PAURAQ//PAURAQUE #1
EYT2012-13	6682427	GRACK/2*CHYAK
EYT2012-13	6682428	GRACK/2*CHYAK
EYT2012-13	6682437	WAXWING*2/TUKURU/3/2*WHEAR/VIVITSI//WHEAR
EYT2012-13	6682434	WAXWING*2/TUKURU/3/2*WHEAR/VIVITSI//WHEAR
EYT2012-13	6682435	WAXWING*2/TUKURU/3/2*WHEAR/VIVITSI//WHEAR
EYT2012-13	6683772	ATTILA/3*BCN/3/CROC_1/AE.SQUARROSA (224)//OPATA/4/CHIBIA//PRLII/CM65531/3/SKAUZ/BAV92/5/GRACK
EYT2012-13	6683779	QUAIU//2*BRBT1*2/KIRITATI
EYT2012-13	6682445	WAXWING*2/TUKURU/3/2*WHEAR/VIVITSI//WHEAR
EYT2012-13	6682203	FRET2*2/4/SNI/TRAP#1/3/KAUZ*2/TRAP//KAUZ/5/2*FRNCLN
EYT2012-13	6682204	FRET2*2/4/SNI/TRAP#1/3/KAUZ*2/TRAP//KAUZ/5/2*FRNCLN
EYT2012-13	6682696	QUAIU #2*2/TINKIO #1
EYT2012-13	6682697	QUAIU #2//ND643/2*WBLL1/3/ND643/2*WBLL1
EYT2012-13	6683786	QUAIU//2*BRBT1*2/KIRITATI
EYT2012-13	6568742	TAM200/PASTOR//TOBA97*2/3/MUNAL
EYT2012-13	6568984	ROLF07*2/SHORTENED SR26 TRANSLOCATION
EYT2012-13	6682866	PFAU/SERI.1B//AMAD/3/WAXWING/4/ND643/2*WBLL1/5/ND643/2*WBLL1
EYT2012-13	6683954	VILLA JUAREZ F2009//KIRITATI/2*TRCH/3/WBLL1*2/BRAMBLING
EYT2012-13	6568710	PRL/2*PASTOR/4/CHOIX/STAR/3/HE1/3*CNO79//2*SERI/5/2*PAURAQUE #1
EYT2012-13	6683960	VILLA JUAREZ F2009//KIRITATI/2*TRCH/3/WBLL1*2/BRAMBLING
EYT2012-13	6682877	MUNAL/3/HUW234+LR34/PRINIA//PFAU/WEAVER/4/MUNAL #1
EYT2012-13	6683966	VILLA JUAREZ F2009//KIRITATI/2*TRCH/3/WBLL1*2/BRAMBLING
EYT2012-13	6683721	WHEAR/VIVITSI//WHEAR/3/FRNCLN
EYT2012-13	6682631	WHEAR/KUKUNA/3/C80.1/3*BATAVIA//2*WBLL1*2/4/KBIRD
EYT2012-13	6683720	WHEAR/VIVITSI//WHEAR/3/FRNCLN
EYT2012-13	6682876	MUNAL/3/HUW234+LR34/PRINIA//PFAU/WEAVER/4/MUNAL #1
EYT2012-13	6568722	SAAR/3/PFAU/SERI.1B//AMAD*2/4/KBIRD
EYT2012-13	6683718	WHEAR/VIVITSI//WHEAR/3/FRNCLN
EYT2012-13	6691573	PFAU/MILAN/3/BABAX/LR42//BABAX/4/WHEAR/KUKUNA/3/C80.1/3*BATAVIA//2*WBLL1
EYT2012-13	6691576	PFAU/MILAN/3/BABAX/LR42//BABAX/4/WHEAR/KUKUNA/3/C80.1/3*BATAVIA//2*WBLL1
EYT2012-13	6691579	PFAU/MILAN/3/BABAX/LR42//BABAX/4/CHEWINK #1
EYT2012-13	6683970	VILLA JUAREZ F2009//KIRITATI/2*TRCH/3/WBLL1*2/BRAMBLING
EYT2012-13	6682640	WHEAR/KUKUNA/3/C80.1/3*BATAVIA//2*WBLL1*2/4/KBIRD
EYT2012-13	6682884	FRNCLN/NIINI #1//FRANCOLIN #1
EYT2012-13	6683729	CHYAK/CHONTE
EYT2012-13	6682893	FRNCLN/3/ND643//2*PRL/2*PASTOR/4/FRANCOLIN #1
EYT2012-13	6682416	PAURAQUE #1*2/4/PFAU/SERI.1B//AMAD/3/PBW343*2/TUKURU
EYT2012-13	6682654	WHEAR/KUKUNA/3/C80.1/3*BATAVIA//2*WBLL1*2/4/KINGBIRD #1
EYT2012-13	6682414	PAURAQUE #1*2/4/PFAU/SERI.1B//AMAD/3/PBW343*2/TUKURU
EYT2012-13	6568703	PRL/2*PASTOR/4/CHOIX/STAR/3/HE1/3*CNO79//2*SERI*2/5/CHONTE
EYT2012-13	6568707	PRL/2*PASTOR/4/CHOIX/STAR/3/HE1/3*CNO79//2*SERI*2/5/PAURAQUE #1
EYT2012-13	6682819	MILAN/S87230//BAV92*2/3/HARIL #1
EYT2012-13	6691541	SOKOLL/WBLL1//BAVIS
EYT2012-13	6683921	TAM200/PASTOR//TOBA97/3/2*MUNAL
EYT2012-13	6682828	MILAN/S87230//BAV92*2/3/HARIL #1
EYT2012-13	6691533	VEE/MJI//2*TUI/3/PASTOR/4/BERKUT/5/MUU
EYT2012-13	6691530	VEE/MJI//2*TUI/3/PASTOR/4/BERKUT/5/ATTILA/3/WEAVER*2/TSC//WEAVER
EYT2012-13	6568926	KISKADEE #1*2//KIRITATI/2*TRCH
EYT2012-13	6691537	CROC_1/AE.SQUARROSA (224)//OPATA/3/WBLL1/4/PAURAQUE #1
EYT2012-13	6568925	KISKADEE #1*2//KIRITATI/2*TRCH
EYT2012-13	6682847	PFAU/SERI.1B//AMAD/3/WAXWING/4/ND643/2*WBLL1/5/ND643/2*WBLL1
EYT2012-13	6682843	PFAU/SERI.1B//AMAD/3/WAXWING*2/4/TINKIO #1
EYT2012-13	6682837	PFAU/SERI.1B//AMAD/3/WAXWING*2/4/TAM200/TUI
EYT2012-13	6682839	PFAU/SERI.1B//AMAD/3/WAXWING*2/4/TINKIO #1
EYT2012-13	6683946	BAJ #1/3/KIRITATI//HUW234+LR34/PRINIA/4/KIRITATI//HUW234+LR34/PRINIA
EYT2012-13	6683943	BAJ #1/3/KIRITATI//HUW234+LR34/PRINIA/4/KIRITATI//HUW234+LR34/PRINIA
EYT2012-13	6682854	PFAU/SERI.1B//AMAD/3/WAXWING/4/ND643/2*WBLL1/5/ND643/2*WBLL1
EYT2012-13	6691551	PFAU/MILAN/3/BABAX/LR42//BABAX/4/BAVIS
EYT2012-13	6691553	PFAU/MILAN/3/BABAX/LR42//BABAX/4/BAVIS
EYT2012-13	6691556	PFAU/MILAN/3/BABAX/LR42//BABAX/11/CROC_1/AE.SQUARROSA (213)//PGO/10/ATTILA*2/9/KT/BAGE//FN/U/3/BZA/4/TRM/5/ALDAN/6/SERI/7/VEE#10/8/OPATA
EYT2012-13	6690647	PASTOR//HXL7573/2*BAU/3/WBLL1/4/PAURAQ
EYT2012-13	6690655	PFAU/MILAN/3/BABAX/LR42//BABAX/4/ATTILA/PASTOR
EYT2012-13	6690640	PASTOR//HXL7573/2*BAU/3/WBLL1/4/1447/PASTOR//KRICHAUFF
EYT2012-13	6682801	MILAN/S87230//BAV92*2/3/HARIL #1
EYT2012-13	6682802	MILAN/S87230//BAV92*2/3/HARIL #1
EYT2012-13	6690670	PFAU/MILAN/3/BABAX/LR42//BABAX/4/KA/NAC//TRCH
EYT2012-13	6690675	PFAU/MILAN/3/BABAX/LR42//BABAX/4/KA/NAC//TRCH
EYT2012-13	6683902	CHONTE*2/FRNCLN
EYT2012-13	6690606	SOKOLL/WBLL1/4/ATTILA/3/WEAVER*2/TSC//WEAVER
EYT2012-13	6684163	MILAN/S87230//BAV92*2/3/HARIL #1
EYT2012-13	6569048	DANPHE #1*2/CHYAK
EYT2012-13	6684160	MILAN/S87230//BAV92*2/3/HARIL #1
EYT2012-13	6684179	MILAN/S87230//BAV92*2/3/HARIL #1
EYT2012-13	6569050	DANPHE #1*2/CHYAK
EYT2012-13	6569056	DANPHE #1*2/CHYAK
EYT2012-13	6684170	MILAN/S87230//BAV92*2/3/HARIL #1
EYT2012-13	6678734	CHIBIA//PRLII/CM65531/3/SKAUZ/BAV92/5/KAUZ*2/MNV//KAUZ/3/MILAN/4/BAV92
EYT2012-13	6690601	SOKOLL/WBLL1//BAVIS
EYT2012-13	6684188	MILAN/S87230//BAV92*2/3/ND643/2*WBLL1
EYT2012-13	6684197	MILAN/S87230//BAV92*2/3/ND643/2*WBLL1
EYT2012-13	6682187	QUAIU*2/KINDE
EYT2012-13	6682188	QUAIU #1/4/2*PFAU/SERI.1B//AMAD/3/WAXWING
EYT2012-13	6684125	MILAN/S87230//BAV92*2/3/HARIL #1
EYT2012-13	6690807	GLADIUS//ATTILA/PASTOR
EYT2012-13	6690805	MON/IMU//ALD/PVN/3/BORL95/4/OASIS/2*BORL95/5/KA/NAC//TRCH
EYT2012-13	6682185	QUAIU*2/KINDE
EYT2012-13	6682186	QUAIU*2/KINDE
EYT2012-13	6569006	CROSBILL #1*2/3/ND643//2*ATTILA*2/PASTOR
EYT2012-13	6684134	MILAN/S87230//BAV92*2/3/HARIL #1
EYT2012-13	6684131	MILAN/S87230//BAV92*2/3/HARIL #1
EYT2012-13	6569011	DANPHE #1*2/BAVIS #1
EYT2012-13	6569019	DANPHE #1*2/3/HUW234+LR34/PRINIA//PFAU/WEAVER
EYT2012-13	6682192	QUAIU #1/4/2*PFAU/SERI.1B//AMAD/3/WAXWING
EYT2012-13	6568374	SERI.1B*2/3/KAUZ*2/BOW//KAUZ/4/2*MUNAL
EYT2012-13	6568371	ROLF07*2//KIRITATI/2*TRCH
EYT2012-13	6568372	ROLF07*2//KIRITATI/2*TRCH
EYT2012-13	6568370	ROLF07*2//KIRITATI/2*TRCH
EYT2012-13	6568389	ATTILA*2/PBW65//FRNCLN/3/FRANCOLIN #1
EYT2012-13	6682146	BABAX/LR42//BABAX*2/3/KURUKU/4/WBLL1*2/BRAMBLING/5/WBLL1*2/BRAMBLING
EYT2012-13	6568597	MILAN/S87230//BAV92/3/2*DANPHE #1
EYT2012-13	6682154	BABAX/LR42//BABAX*2/3/TUKURU/4/2*KIRITATI//PBW65/2*SERI.1B
EYT2012-13	6568362	ROLF07/PAURAQ//PAURAQUE #1
EYT2012-13	6568360	ROLF07*2/PAURAQ
EYT2012-13	6682159	QUAIU//2*BRBT1*2/KIRITATI
EYT2012-13	6682391	PAURAQ*2/KBIRD
EYT2012-13	6682165	QUAIU*2/KINDE
EYT2012-13	6682164	QUAIU*2/KINDE
EYT2012-13	6684107	MILAN/S87230//BAV92*2/3/HARIL #1
EYT2012-13	6568578	KIRITATI/4/2*SERI.1B*2/3/KAUZ*2/BOW//KAUZ/5/2*PFAU/SERI.1B//AMAD/3/WAXWING
EYT2012-13	6682160	QUAIU//2*BRBT1*2/KIRITATI
EYT2012-13	6682178	QUAIU*2/KINDE
EYT2012-13	6684114	MILAN/S87230//BAV92*2/3/HARIL #1
EYT2012-13	6568342	CHEWINK #1/3/MILAN/S87230//BAV92
EYT2012-13	6568341	CHEWINK #1/3/MILAN/S87230//BAV92
EYT2012-13	6568347	WHEAR/VIVITSI//WHEAR/3/KIRITATI/2*TRCH
EYT2012-13	6682171	QUAIU*2/KINDE
EYT2012-13	6682340	THELIN/3/BABAX/LR42//BABAX/4/BABAX/LR42//BABAX*2/5/KIRITATI/2*TRCH
EYT2012-13	6568791	TOBA97/PASTOR*2//KBIRD
EYT2012-13	6692394	SOKOLL/WBLL1/5/CROC_1/AE.SQUARROSA (205)//BORL95/3/PRL/SARA//TSI/VEE#5/4/FRET2
EYT2012-13	6692397	SOKOLL/WBLL1//92.001E7.32.5/SLVS
EYT2012-13	6682594	WBLL1*2/KKTS//KINGBIRD #1/3/TAM200/PASTOR//TOBA97
EYT2012-13	6682118	SERI.1B*2/3/KAUZ*2/BOW//KAUZ/4/2*MUNAL
EYT2012-13	6692387	PUB94.15.1.12/FRTL//92.001E7.32.5/SLVS
EYT2013-14	6932583	BRBT1*2/KIRITATI*2/6/YAR/AE.SQUARROSA (783)/4/GOV/AZ//MUS/3/SARA/5/MYNA/VUL//JUN
EYT2013-14	6932344	WHEAR/KIRITATI/3/C80.1/3*BATAVIA//2*WBLL1/4/2*KACHU
EYT2013-14	6932347	WHEAR/KIRITATI/3/C80.1/3*BATAVIA//2*WBLL1/4/2*KACHU
EYT2013-14	6933420	WBLL1*2/4/YACO/PBW65/3/KAUZ*2/TRAP//KAUZ/5/KACHU #1/6/TRCH/SRTU//KACHU
EYT2013-14	6933422	WBLL1*2/4/YACO/PBW65/3/KAUZ*2/TRAP//KAUZ/5/KACHU #1/6/TRCH/SRTU//KACHU
EYT2013-14	6933421	WBLL1*2/4/YACO/PBW65/3/KAUZ*2/TRAP//KAUZ/5/KACHU #1/6/TRCH/SRTU//KACHU
EYT2013-14	6862387	CHONTE/KINGBIRD #1/5/WBLL1*2/VIVITSI/4/D67.2/PARANA 66.270//AE.SQUARROSA (320)/3/CUNNINGHAM
EYT2013-14	6936939	KACHU/KINGBIRD #1
EYT2013-14	6932576	WAXWING/KRONSTAD F2004//2*FRNCLN
EYT2013-14	6932577	WAXWING/KRONSTAD F2004//2*FRNCLN
EYT2013-14	6933426	WBLL1*2/4/YACO/PBW65/3/KAUZ*2/TRAP//KAUZ/5/KACHU #1/6/SERI.1B//KAUZ/HEVO/3/AMAD*2/4/KIRITATI
EYT2013-14	6936933	KACHU/MUU
EYT2013-14	6933425	WBLL1*2/4/YACO/PBW65/3/KAUZ*2/TRAP//KAUZ/5/KACHU #1/6/SERI.1B//KAUZ/HEVO/3/AMAD*2/4/KIRITATI
EYT2013-14	6934982	MEX94.27.1.20/3/SOKOLL//ATTILA/3*BCN/4/HUW234+LR34/PRINIA//PBW343*2/KUKUNA/3/ROLF07
EYT2013-14	6932320	SERI.1B*2/3/KAUZ*2/BOW//KAUZ/4/CIRCUS/5/2*PRL/2*PASTOR//PBW343*2/KUKUNA/3/ROLF07
EYT2013-14	6862370	SAAR//INQALAB 91*2/KUKUNA/3/KINGBIRD #1/5/BAV92//IRENA/KAUZ/3/HUITES/4/DOLL
EYT2013-14	6933418	WBLL1*2/4/YACO/PBW65/3/KAUZ*2/TRAP//KAUZ/5/KACHU #1/6/TRCH/SRTU//KACHU
EYT2013-14	6936921	WAXWING/PICAFLOR #1
EYT2013-14	6932325	SAAR//INQALAB 91*2/KUKUNA/4/2*PRL/2*PASTOR//PBW343*2/KUKUNA/3/ROLF07
EYT2013-14	6934973	SOKOLL/3/PASTOR//HXL7573/2*BAU/4/NELOKI
EYT2013-14	6933400	WBLL1*2/4/SNI/TRAP#1/3/KAUZ*2/TRAP//KAUZ/5/KACHU/6/TRCH/SRTU//KACHU
EYT2013-14	6932311	KIRITATI/2*TRCH//2*WBLL1*2/BRAMBLING
EYT2013-14	6938099	MUNAL #1/5/2*PRL/2*PASTOR/4/CHOIX/STAR/3/HE1/3*CNO79//2*SERI
EYT2013-14	6938098	MUNAL #1/5/2*PRL/2*PASTOR/4/CHOIX/STAR/3/HE1/3*CNO79//2*SERI
EYT2013-14	6862365	SAAR//INQALAB 91*2/KUKUNA/3/KIRITATI/2*TRCH/5/BAV92//IRENA/KAUZ/3/HUITES/4/DOLL
EYT2013-14	6933409	WBLL1*2/4/SNI/TRAP#1/3/KAUZ*2/TRAP//KAUZ/5/KACHU/6/SERI.1B//KAUZ/HEVO/3/AMAD*2/4/KIRITATI
EYT2013-14	6933401	WBLL1*2/4/SNI/TRAP#1/3/KAUZ*2/TRAP//KAUZ/5/KACHU/6/TRCH/SRTU//KACHU
EYT2013-14	6934974	SOKOLL//W15.92/WBLL1/3/BAVIS
EYT2013-14	6937831	WBLL1*2/4/YACO/PBW65/3/KAUZ*2/TRAP//KAUZ/6/2*KAUZ//ALTAR 84/AOS/3/PASTOR/4/MILAN/CUPE//SW89.3064/5/KIRITATI
EYT2013-14	6933234	SUP152/7/TUKURU//BAV92/RAYON/6/NG8201/KAUZ/4/SHA7//PRL/VEE#6/3/FASAN/5/MILAN/KAUZ
EYT2013-14	6932388	PFAU/MILAN/5/CHEN/AEGILOPS SQUARROSA (TAUS)//BCN/3/VEE#7/BOW/4/PASTOR/6/MUNAL #1/7/PFUNYE #1
EYT2013-14	6933231	SUP152/7/TUKURU//BAV92/RAYON/6/NG8201/KAUZ/4/SHA7//PRL/VEE#6/3/FASAN/5/MILAN/KAUZ
EYT2013-14	6933230	SUP152/6/TRAP#1/BOW/3/VEE/PJN//2*TUI/4/BAV92/RAYON/5/KACHU #1
EYT2013-14	6861263	PBW343*2/KUKUNA//PBW343*2/KUKUNA/3/KINGBIRD #1
EYT2013-14	6863204	PANDORA/PRL
EYT2013-14	6933237	SUP152/3/TRCH/SRTU//KACHU
EYT2013-14	6932132	SNB//CMH79A.955/3*CNO79/3/ATTILA/4/CHEN/AEGILOPS SQUARROSA (TAUS)//BCN/3/2*KAUZ/5/KINGBIRD #1
EYT2013-14	6933222	BABAX/LR42//BABAX*2/3/PAVON 7S3, +LR47/4/ROLF07/YANAC//TACUPETO F2001/BRAMBLING
EYT2013-14	6938911	ATTILA*2/PBW65//BERKUT/3/2*KA/NAC//TRCH
EYT2013-14	6936974	BLOUK #1/KINGBIRD #1
EYT2013-14	6933221	BABAX/LR42//BABAX*2/3/PAVON 7S3, +LR47/4/ROLF07/YANAC//TACUPETO F2001/BRAMBLING
EYT2013-14	6933223	BABAX/LR42//BABAX*2/3/PAVON 7S3, +LR47/4/ROLF07/YANAC//TACUPETO F2001/BRAMBLING
EYT2013-14	6933226	SUP152/3/INQALAB 91*2/TUKURU//WHEAR
EYT2013-14	6933225	SUP152/3/INQALAB 91*2/TUKURU//WHEAR
EYT2013-14	6933227	SUP152/3/INQALAB 91*2/TUKURU//WHEAR
EYT2013-14	6937810	BAJ #1*2/3/PBW343*2/KUKUNA//PBW343*2/KUKUNA
EYT2013-14	6931277	MELON//FILIN/MILAN/3/FILIN/4/KINGBIRD #1
EYT2013-14	6933212	FRANCOLIN #1/8/PBW343*2/KUKUNA/6/PVN//CAR422/ANA/5/BOW/CROW//BUC/PVN/3/YR/4/TRAP#1/7/PBW343
EYT2013-14	6936969	BAJ #1/DANPHE #1
EYT2013-14	6933214	FRANCOLIN #1/8/PBW343*2/KUKUNA/6/PVN//CAR422/ANA/5/BOW/CROW//BUC/PVN/3/YR/4/TRAP#1/7/PBW343
EYT2013-14	6932126	OTUS/3/PBW343/PASTOR//ATTILA/3*BCN/4/KINGBIRD #1
EYT2013-14	6932128	SNB//CMH79A.955/3*CNO79/3/ATTILA/4/CHEN/AEGILOPS SQUARROSA (TAUS)//BCN/3/2*KAUZ/5/KINGBIRD #1
EYT2013-14	6932110	BECARD/PFUNYE #1
EYT2013-14	6933201	BAJ #1/5/ATTILA/3*BCN//BAV92/3/TILHI/4/SHA7/VEE#5//ARIV92
EYT2013-14	6932355	WHEAR/KUKUNA/3/C80.1/3*BATAVIA//2*WBLL1/4/2*WAXWING*2/KRONSTAD F2004
EYT2013-14	6932597	BECARD/2*FRNCLN
EYT2013-14	6863412	CETA/AE.SQUARROSA (174)//MUU/3/MUNAL
EYT2013-14	6933207	BAJ #1/3/TRCH/SRTU//KACHU
EYT2013-14	6932356	WHEAR/KUKUNA/3/C80.1/3*BATAVIA//2*WBLL1/4/2*WAXWING*2/KRONSTAD F2004
EYT2013-14	6933204	BAJ #1/3/TRCH/SRTU//KACHU
EYT2013-14	6933206	BAJ #1/3/TRCH/SRTU//KACHU
EYT2013-14	6932358	WHEAR/KUKUNA/3/C80.1/3*BATAVIA//2*WBLL1/8/VEE#8//JUP/BJY/3/F3.71/TRM/4/BCN/5/KAUZ/6/MILAN/KAUZ/7/SKAUZ/PARUS//PARUS/9/KACHU
EYT2013-14	6933205	BAJ #1/3/TRCH/SRTU//KACHU
EYT2013-14	6932359	WHEAR/KUKUNA/3/C80.1/3*BATAVIA//2*WBLL1/8/VEE#8//JUP/BJY/3/F3.71/TRM/4/BCN/5/KAUZ/6/MILAN/KAUZ/7/SKAUZ/PARUS//PARUS/9/KACHU
EYT2013-14	6935215	SOKOLL/3/PASTOR//HXL7573/2*BAU/4/ATTILA/PASTOR
EYT2013-14	6936788	ND643/2*WBLL1//ND643/2*WAXWING
EYT2013-14	6936543	PFUNYE #1/KINGBIRD #1/6/PFAU/MILAN/5/CHEN/AEGILOPS SQUARROSA (TAUS)//BCN/3/VEE#7/BOW/4/PASTOR
EYT2013-14	6936544	PFUNYE #1/KINGBIRD #1/6/PFAU/MILAN/5/CHEN/AEGILOPS SQUARROSA (TAUS)//BCN/3/VEE#7/BOW/4/PASTOR
EYT2013-14	6937874	SUP152/2*MUNAL #1
EYT2013-14	6938721	ATTILA/PASTOR/4/HUW234+LR34/PRINIA//PBW343*2/KUKUNA/3/ROLF07
EYT2013-14	6689579	ND643/2*WBLL1//KACHU
EYT2013-14	6933031	SW89.5277/BORL95//SKAUZ/3/PRL/2*PASTOR/4/HEILO*2/5/MUNAL #1
EYT2013-14	6936542	PFUNYE #1/KINGBIRD #1/6/PFAU/MILAN/5/CHEN/AEGILOPS SQUARROSA (TAUS)//BCN/3/VEE#7/BOW/4/PASTOR
EYT2013-14	6932185	KRL 19/5/KIRITATI/4/2*SERI.1B*2/3/KAUZ*2/BOW//KAUZ
EYT2013-14	6935450	ISENGRAIN/KBIRD//MUNAL #1
EYT2013-14	6937870	KACHU*2/PANDORA
EYT2013-14	6932181	PANDORA/PRL
EYT2013-14	6938728	BAVIS/4/TC870344/GUI//TEMPORALERA M 87/AGR/3/2*WBLL1
EYT2013-14	6937638	PRL/2*PASTOR/4/CHOIX/STAR/3/HE1/3*CNO79//2*SERI*2/5/WAXWING*2/KRONSTAD F2004
EYT2013-14	6938726	CROC_1/AE.SQUARROSA (205)//BORL95/3/PRL/SARA//TSI/VEE#5/4/FRET2/5/HUW234+LR34/PRINIA//PBW343*2/KUKUNA/3/ROLF07
EYT2013-14	6938725	CROC_1/AE.SQUARROSA (205)//BORL95/3/PRL/SARA//TSI/VEE#5/4/FRET2/5/HUW234+LR34/PRINIA//PBW343*2/KUKUNA/3/ROLF07
EYT2013-14	6937866	KACHU//2*WHEAR/SOKOLL
EYT2013-14	6938713	PASTOR//HXL7573/2*BAU/3/SOKOLL/WBLL1/4/HUW234+LR34/PRINIA//PBW343*2/KUKUNA/3/ROLF07/5/WHEAR/SOKOLL
EYT2013-14	6938711	PASTOR//HXL7573/2*BAU/3/SOKOLL/WBLL1/4/HUW234+LR34/PRINIA//PBW343*2/KUKUNA/3/ROLF07/5/WHEAR/SOKOLL
EYT2013-14	6936532	SUP152*2/PFUNYE #1
EYT2013-14	6937864	KACHU*2//WHEAR/SOKOLL
EYT2013-14	6936533	SUP152*2/PFUNYE #1
EYT2013-14	6937863	KACHU*2//WHEAR/SOKOLL
EYT2013-14	6933262	SERI.1B*2/3/KAUZ*2/BOW//KAUZ/4/PBW343*2/KHVAKI/5/PBW343*2/KUKUNA/6/TRCH/SRTU//KACHU
EYT2013-14	6932172	PFAU/MILAN//TROST/3/PBW65/2*SERI.1B/4/KINGBIRD #1
EYT2013-14	6936530	SUP152*2/PFUNYE #1
EYT2013-14	6937862	KACHU/2*MUNAL #1
EYT2013-14	6933261	SERI.1B*2/3/KAUZ*2/BOW//KAUZ/4/PBW343*2/KHVAKI/5/PBW343*2/KUKUNA/6/TRCH/SRTU//KACHU
EYT2013-14	6932173	PFAU/MILAN//TROST/3/PBW65/2*SERI.1B/4/KINGBIRD #1
EYT2013-14	6936770	KIRITATI//HUW234+LR34/PRINIA/4/HUW234+LR34/PRINIA//PBW343*2/KUKUNA/3/ROLF07
EYT2013-14	6937860	KACHU/2*MUNAL #1
EYT2013-14	6932174	PFAU/MILAN//TROST/3/PBW65/2*SERI.1B/4/KINGBIRD #1
EYT2013-14	6936538	SUP152*2/4/HUW234+LR34/PRINIA//PBW343*2/KUKUNA/3/ROLF07
EYT2013-14	6937869	KACHU*2/PANDORA
EYT2013-14	6936536	SUP152*2/5/KIRITATI/4/2*SERI.1B*2/3/KAUZ*2/BOW//KAUZ
EYT2013-14	6938715	W15.92/4/PASTOR//HXL7573/2*BAU/3/WBLL1*2/5/HUW234+LR34/PRINIA//PBW343*2/KUKUNA/3/ROLF07
EYT2013-14	6935205	TC870344/GUI//TEMPORALERA M 87/AGR/3/2*WBLL1/4/HUW234+LR34/PRINIA//PBW343*2/KUKUNA/3/ROLF07
EYT2013-14	6938714	PASTOR//HXL7573/2*BAU/3/SOKOLL/WBLL1/4/HUW234+LR34/PRINIA//PBW343*2/KUKUNA/3/ROLF07/5/WHEAR/SOKOLL
EYT2013-14	6937867	KACHU*2/PANDORA
EYT2013-14	6936537	SUP152*2/4/HUW234+LR34/PRINIA//PBW343*2/KUKUNA/3/ROLF07
EYT2013-14	6937855	KACHU*2/MUNAL #1
EYT2013-14	6938702	PASTOR//HXL7573/2*BAU/3/SOKOLL/WBLL1*2/4/PASTOR//MILAN/KAUZ/3/BAV92
EYT2013-14	6936523	SUP152*2/PFUNYE #1
EYT2013-14	6937854	KACHU*2/MUNAL #1
EYT2013-14	6937853	KACHU*2/MUNAL #1
EYT2013-14	6933256	WAXWING*2/KRONSTAD F2004/3/TRCH/SRTU//KACHU
EYT2013-14	6932168	CHYAK/PRL
EYT2013-14	6932161	WHEAR//2*PRL/2*PASTOR/3/WAXWING/KRONSTAD F2004
EYT2013-14	6937851	KACHU*2/MUNAL #1
EYT2013-14	6937850	KACHU*2/BECARD
EYT2013-14	6933253	WAXWING*2/KRONSTAD F2004/3/TRCH/SRTU//KACHU
EYT2013-14	6936529	SUP152*2/PFUNYE #1
EYT2013-14	6937859	KACHU/2*MUNAL #1
EYT2013-14	6938706	PASTOR//HXL7573/2*BAU/3/SOKOLL/WBLL1/4/KINGBIRD #1/5/MUNAL #1
EYT2013-14	6938947	W15.92/4/PASTOR//HXL7573/2*BAU/3/WBLL1*2/5/WHEAR/SOKOLL
EYT2013-14	6937857	KACHU*2/MUNAL #1
EYT2013-14	6935436	PREMIO/5/2*CROC_1/AE.SQUARROSA (205)//BORL95/3/PRL/SARA//TSI/VEE#5/4/FRET2
EYT2013-14	6936526	SUP152*2/PFUNYE #1
EYT2013-14	6937856	KACHU*2/MUNAL #1
EYT2013-14	6938933	ATTILA/PASTOR//SHORTENED SR26 TRANSLOCATION/3/ATTILA/BAV92//PASTOR
EYT2013-14	6932398	ELVIRA/5/CNDO/R143//ENTE/MEXI75/3/AE.SQ/4/2*OCI/6/VEE/PJN//KAUZ/3/PASTOR/7/2*PBW343*2/KUKUNA//PBW343*2/KUKUNA
EYT2013-14	6933246	PFAU/SERI.1B//AMAD/3/KRONSTAD F2004/4/PBW343*2/KUKUNA//PBW343*2/KUKUNA
EYT2013-14	6935422	QUENO INIA/4/2*SOKOLL/3/PASTOR//HXL7573/2*BAU
EYT2013-14	6932153	HUW234+LR34/PRINIA//PBW343*2/KUKUNA/3/ROLF07/4/KINGBIRD #1
EYT2013-14	6863290	KIRITATI/2*WBLL1/8/SHA7//PRL/VEE#6/3/FASAN/4/HAAS8446/2*FASAN/5/CBRD/KAUZ/6/MILAN/AMSEL/7/FRET2*2/KUKUNA/9/PFAU/SERI.1B//AMAD*2/3/PBW343*2/KUKUNA
EYT2013-14	6935429	ARESO/2*WBLL1
EYT2013-14	6938939	CROC_1/AE.SQUARROSA (205)//BORL95/3/PRL/SARA//TSI/VEE#5/4/FRET2*2/5/WHEAR/SOKOLL
EYT2013-14	6938938	CROC_1/AE.SQUARROSA (205)//BORL95/3/PRL/SARA//TSI/VEE#5/4/FRET2*2/5/WHEAR/SOKOLL
EYT2013-14	6938937	ATTILA/PASTOR//SHORTENED SR26 TRANSLOCATION/3/ATTILA/BAV92//PASTOR
EYT2013-14	6933005	PASTOR/3/VORONA/CNO79//KAUZ/4/MILAN/OTUS//ATTILA/3*BCN/5/2*MUNAL #1
EYT2013-14	6937846	KACHU*2/5/PRL/2*PASTOR/4/CHOIX/STAR/3/HE1/3*CNO79//2*SERI
EYT2013-14	6938934	ATTILA/PASTOR//SHORTENED SR26 TRANSLOCATION/3/ATTILA/BAV92//PASTOR
EYT2013-14	6933007	WHEAR/3/PBW343/PASTOR//ATTILA/3*BCN/4/KINGBIRD #1/5/SUP152
EYT2013-14	6936589	CHONTE/KINGBIRD #1/5/WBLL1*2/VIVITSI/4/D67.2/PARANA 66.270//AE.SQUARROSA (320)/3/CUNNINGHAM
EYT2013-14	6937679	PRL/2*PASTOR/4/CHOIX/STAR/3/HE1/3*CNO79//2*SERI*2/8/SHA7//PRL/VEE#6/3/FASAN/4/HAAS8446/2*FASAN/5/CBRD/KAUZ/6/MILAN/AMSEL/7/FRET2*2/KUKUNA
EYT2013-14	6935254	MON/IMU//ALD/PVN/3/BORL95/4/OASIS/2*BORL95/5/HUW234+LR34/PRINIA//PBW343*2/KUKUNA/3/ROLF07
EYT2013-14	6935255	MON/IMU//ALD/PVN/3/BORL95/4/OASIS/2*BORL95/5/HUW234+LR34/PRINIA//PBW343*2/KUKUNA/3/ROLF07
EYT2013-14	6935253	MON/IMU//ALD/PVN/3/BORL95/4/OASIS/2*BORL95/5/HUW234+LR34/PRINIA//PBW343*2/KUKUNA/3/ROLF07
EYT2013-14	6935251	MON/IMU//ALD/PVN/3/BORL95/4/OASIS/2*BORL95/5/HUW234+LR34/PRINIA//PBW343*2/KUKUNA/3/ROLF07
EYT2013-14	6936336	ND643/2*WAXWING//KINGBIRD #1/4/WAXWING/3/PFAU/WEAVER//BRAMBLING
EYT2013-14	6935247	MON/IMU//ALD/PVN/3/BORL95/4/OASIS/2*BORL95/5/HUW234+LR34/PRINIA//PBW343*2/KUKUNA/3/ROLF07
EYT2013-14	6935248	MON/IMU//ALD/PVN/3/BORL95/4/OASIS/2*BORL95/5/HUW234+LR34/PRINIA//PBW343*2/KUKUNA/3/ROLF07
EYT2013-14	6935245	MON/IMU//ALD/PVN/3/BORL95/4/OASIS/2*BORL95/5/HUW234+LR34/PRINIA//PBW343*2/KUKUNA/3/ROLF07
EYT2013-14	6935246	MON/IMU//ALD/PVN/3/BORL95/4/OASIS/2*BORL95/5/HUW234+LR34/PRINIA//PBW343*2/KUKUNA/3/ROLF07
EYT2013-14	6936575	SAAR//INQALAB 91*2/KUKUNA/3/KIRITATI/2*TRCH/5/BAV92//IRENA/KAUZ/3/HUITES/4/DOLL
EYT2013-14	6936572	KINDE #1*2/KINGBIRD #1
EYT2013-14	6937420	ATTILA*2/PBW65/5/PRL/2*PASTOR/4/CHOIX/STAR/3/HE1/3*CNO79//2*SERI/6/PFUNYE #1
EYT2013-14	6935249	MON/IMU//ALD/PVN/3/BORL95/4/OASIS/2*BORL95/5/HUW234+LR34/PRINIA//PBW343*2/KUKUNA/3/ROLF07
EYT2013-14	6937415	PRL/2*PASTOR//WHEAR/SOKOLL/3/KACHU
EYT2013-14	6936326	ND643/2*WBLL1//KINGBIRD #1/4/MELON//FILIN/MILAN/3/FILIN
EYT2013-14	6935237	MON/IMU//ALD/PVN/3/BORL95/4/OASIS/2*BORL95/5/SOKOLL/3/PASTOR//HXL7573/2*BAU
EYT2013-14	6935477	PREMIO//ATTILA*2/PBW65/3/ATTILA/PASTOR
EYT2013-14	6689556	WBLL1*2/BRAMBLING//TAM200/TUI/3/VILLA JUAREZ F2009
EYT2013-14	6937895	FRANCOLIN #1*2//WAXWING*2/KRONSTAD F2004
EYT2013-14	6933294	BECARD/3/WAXWING/PARUS//WAXWING/KIRITATI
EYT2013-14	6933296	BECARD/4/PBW343*2/KUKUNA//PARUS/3/PBW343*2/KUKUNA
EYT2013-14	6933291	PAURAQ/4/MARCHOUCH*4/SAADA/3/2*FRET2/KUKUNA//FRET2
EYT2013-14	6689550	MUTUS*2/HARIL #1
EYT2013-14	6938749	KA/NAC//TRCH/5/W15.92/4/PASTOR//HXL7573/2*BAU/3/WBLL1
EYT2013-14	6935239	MON/IMU//ALD/PVN/3/BORL95/4/OASIS/2*BORL95/5/SOKOLL/3/PASTOR//HXL7573/2*BAU
EYT2013-14	6935465	ZANDER-44/3/ATTILA/BAV92//PASTOR/4/ATTILA/PASTOR
EYT2013-14	6938732	BAVIS/4/SOKOLL/3/PASTOR//HXL7573/2*BAU
EYT2013-14	6937400	PRL/2*PASTOR//WAXWING*2/KRONSTAD F2004/4/PBW343*2/KUKUNA//KRONSTAD F2004/3/PBW343*2/KUKUNA
EYT2013-14	6938973	PREMIO/2*BAVIS
EYT2013-14	6936795	ND643/2*WBLL1//ND643/2*WAXWING
EYT2013-14	6936792	ND643/2*WBLL1//ND643/2*WAXWING
EYT2013-14	6933280	HP 1744//INQALAB 91*2/KUKUNA/7/WAXWING/6/PVN//CAR422/ANA/5/BOW/CROW//BUC/PVN/3/YR/4/TRAP#1
EYT2013-14	6863491	MERCATO//PARUS/PASTOR
EYT2013-14	6933282	CAL/NH//H567.71/3/SERI/4/CAL/NH//H567.71/5/2*KAUZ/6/WH576/7/WH 542/8/WAXWING/9/ATTILA*2/PBW65/6/PVN//CAR422/ANA/5/BOW/CROW//BUC/PVN/3/YR/4/TRAP#1/7/ATTILA/2*PASTOR
EYT2013-14	6932193	SMART/KINGBIRD #1
EYT2013-14	6936559	CHIBIA//PRLII/CM65531/3/SKAUZ/BAV92/4/KINGBIRD #1/5/CHEN/AEGILOPS SQUARROSA (TAUS)//BCN/3/BAV92/4/INQALAB 91*2/KUKUNA
EYT2013-14	6938324	VEE#8//JUP/BJY/3/F3.71/TRM/4/BCN/5/KAUZ/6/MILAN/KAUZ/7/SKAUZ/PARUS//PARUS/8/KBIRD/9/KACHU
EYT2013-14	6938320	VEE#8//JUP/BJY/3/F3.71/TRM/4/BCN/5/KAUZ/6/MILAN/KAUZ/7/SKAUZ/PARUS//PARUS/8/KBIRD/9/KACHU
EYT2013-14	6938562	MILAN/KAUZ//BABAX/3/BAV92*2/4/BERKUT//PBW343*2/KUKUNA
EYT2013-14	6936383	NELOKI/5/PRL/2*PASTOR/4/CHOIX/STAR/3/HE1/3*CNO79//2*SERI/6/NELOKI
EYT2013-14	6936384	NELOKI/5/PRL/2*PASTOR/4/CHOIX/STAR/3/HE1/3*CNO79//2*SERI/6/NELOKI
EYT2013-14	6936381	WAXWING*2//INQALAB 91*2/KUKUNA/3/PRL/4/WAXWING*2//INQALAB 91*2/KUKUNA
EYT2013-14	6935291	BABAX/LR42//BABAX/3/ER2000/4/KA/NAC//TRCH/5/SOKOLL/3/PASTOR//HXL7573/2*BAU
EYT2013-14	6688880	KISKADEE #1/5/KAUZ*2/MNV//KAUZ/3/MILAN/4/BAV92/6/WHEAR//2*PRL/2*PASTOR
EYT2013-14	6939896	W15.92/4/PASTOR//HXL7573/2*BAU/3/WBLL1/5/BAV92/SERI
EYT2013-14	6939899	SOKOLL/3/PASTOR//HXL7573/2*BAU/4/GLADIUS
EYT2013-14	6938799	SOKOLL/3/PASTOR//HXL7573/2*BAU/4/HUW234+LR34/PRINIA//PBW343*2/KUKUNA/3/ROLF07
EYT2013-14	6938555	KRL 19/2*BECARD
EYT2013-14	6938554	KRL 19/2*QUAIU #1
EYT2013-14	6938551	PFAU/MILAN//TROST/3/PBW65/2*SERI.1B*2/4/MUNAL #1
EYT2013-14	6938550	PFAU/MILAN//TROST/3/PBW65/2*SERI.1B*2/4/MUNAL #1
EYT2013-14	6935282	AGT YOUNG/5/CROC_1/AE.SQUARROSA (205)//BORL95/3/PRL/SARA//TSI/VEE#5/4/FRET2/6/ROLF07
EYT2013-14	6936371	GRACK*2/KINGBIRD #1
EYT2013-14	6939881	KS82W418/SPN/3/CHEN/AE.SQ//2*OPATA/4/FRET2/5/MEX94.2.19//SOKOLL/WBLL1
EYT2013-14	6938547	WHEAR/KIRITATI/3/C80.1/3*BATAVIA//2*WBLL1*2/4/PANDORA
EYT2013-14	6936367	PAURAQ/KINGBIRD #1/6/FRET2/KUKUNA//FRET2/3/PARUS/5/FRET2*2/4/SNI/TRAP#1/3/KAUZ*2/TRAP//KAUZ
EYT2013-14	6935036	ROLF07/KINGBIRD #1//MUNAL #1
EYT2013-14	6937215	SHA7/VEE#5/5/VEE#8//JUP/BJY/3/F3.71/TRM/4/2*WEAVER/6/SKAUZ/PARUS//PARUS/7/DANPHE #1
EYT2013-14	6938304	CNDO/R143//ENTE/MEXI_2/3/AEGILOPS SQUARROSA (TAUS)/4/WEAVER/5/IRENA/6/LERKE/7/KINGBIRD #1/8/CNDO/R143//ENTE/MEXI_2/3/AEGILOPS SQUARROSA (TAUS)/4/WEAVER/5/PICUS/6/TROST/7/TACUPETO F2001
EYT2013-14	6937457	DANPHE #1/STLN/5/PRL/2*PASTOR/4/CHOIX/STAR/3/HE1/3*CNO79//2*SERI
EYT2013-14	6936368	PAURAQ/KINGBIRD #1/6/FRET2/KUKUNA//FRET2/3/PARUS/5/FRET2*2/4/SNI/TRAP#1/3/KAUZ*2/TRAP//KAUZ
EYT2013-14	6936366	PAURAQ/KINGBIRD #1/6/FRET2/KUKUNA//FRET2/3/PARUS/5/FRET2*2/4/SNI/TRAP#1/3/KAUZ*2/TRAP//KAUZ
EYT2013-14	6935274	BAV92/3/PRL/SARA//TSI/VEE#5/4/WBLL1/5/CROC_1/AE.SQUARROSA (205)//BORL95/3/PRL/SARA//TSI/VEE#5/4/FRET2/6/NS-732/HER/3/PRL/SARA//TSI/VEE#5/4/FRET2
EYT2013-14	6938783	SOKOLL/3/PASTOR//HXL7573/2*BAU/4/PASTOR//MILAN/KAUZ/3/BAV92
EYT2013-14	6935030	MUNAL #1/11/CROC_1/AE.SQUARROSA (213)//PGO/10/ATTILA*2/9/KT/BAGE//FN/U/3/BZA/4/TRM/5/ALDAN/6/SERI/7/VEE#10/8/OPATA
EYT2013-14	6936362	PAURAQ/KINGBIRD #1/6/FRET2/KUKUNA//FRET2/3/PARUS/5/FRET2*2/4/SNI/TRAP#1/3/KAUZ*2/TRAP//KAUZ
EYT2013-14	6935273	BAV92/3/PRL/SARA//TSI/VEE#5/4/WBLL1/5/CROC_1/AE.SQUARROSA (205)//BORL95/3/PRL/SARA//TSI/VEE#5/4/FRET2/6/NS-732/HER/3/PRL/SARA//TSI/VEE#5/4/FRET2
EYT2013-14	6935028	GRACKLE #1/4/SOKOLL/3/PASTOR//HXL7573/2*BAU
EYT2013-14	6938535	WHEAR/SOKOLL/3/BERKUT//PBW343*2/KUKUNA/4/WHEAR/SOKOLL
EYT2013-14	6935268	PAURAQ/4/HUW234+LR34/PRINIA//PBW343*2/KUKUNA/3/ROLF07
EYT2013-14	6938774	NS-732/HER/3/PRL/SARA//TSI/VEE#5/4/FRET2/5/WHEAR/SOKOLL
EYT2013-14	6936355	PAURAQ/KINGBIRD #1//KINDE #1
EYT2013-14	6938531	WHEAR/SOKOLL*2//QUAIU #1
EYT2013-14	6938530	WHEAR/SOKOLL*2//QUAIU #1
EYT2013-14	6935264	GLADIUS/5/W15.92/4/PASTOR//HXL7573/2*BAU/3/WBLL1
EYT2013-14	6936595	SERI.1B*2/3/KAUZ*2/BOW//KAUZ/5/CNO79//PF70354/MUS/3/PASTOR/4/BAV92/6/PRL/7/SERI.1B*2/3/KAUZ*2/BOW//KAUZ/4/PBW343*2/KHVAKI/5/PBW343*2/KUKUNA
EYT2013-14	6938770	NS-732/HER/3/PRL/SARA//TSI/VEE#5/4/FRET2/5/PASTOR//HXL7573/2*BAU/3/SOKOLL/WBLL1
EYT2013-14	6937680	PRL/2*PASTOR/4/CHOIX/STAR/3/HE1/3*CNO79//2*SERI*2/8/SHA7//PRL/VEE#6/3/FASAN/4/HAAS8446/2*FASAN/5/CBRD/KAUZ/6/MILAN/AMSEL/7/FRET2*2/KUKUNA
EYT2013-14	6938124	MUNAL #1*2/3/BERKUT//PBW343*2/KUKUNA
EYT2013-14	6937035	PFUNYE #1/KINGBIRD #1
EYT2013-14	6937034	PFUNYE #1/KINGBIRD #1
EYT2013-14	6569128	FRNCLN*2//TAM200/TUI
EYT2013-14	6931736	CHONTE/KINGBIRD #1/5/WBLL1*2/VIVITSI/4/D67.2/PARANA 66.270//AE.SQUARROSA (320)/3/CUNNINGHAM
EYT2013-14	6931730	DANPHE*2/KINGBIRD #1
EYT2013-14	6932821	SHA7/VEE#5/5/VEE#8//JUP/BJY/3/F3.71/TRM/4/2*WEAVER/6/SKAUZ/PARUS//PARUS*2/7/MUNAL #1
EYT2013-14	6938116	MUNAL #1*2/3/PBW343*2/KUKUNA//PBW343*2/KUKUNA
EYT2013-14	6935086	PASTOR//HXL7573/2*BAU/3/SOKOLL/WBLL1*2/4/PAURAQ
EYT2013-14	6931728	DANPHE*2/PFUNYE #1
EYT2013-14	6932818	SHA7/VEE#5/5/VEE#8//JUP/BJY/3/F3.71/TRM/4/2*WEAVER/6/SKAUZ/PARUS//PARUS/7/2*MUNAL #1
EYT2013-14	6931729	DANPHE*2/PFUNYE #1
EYT2013-14	6938348	SHA7/VEE#5/5/VEE#8//JUP/BJY/3/F3.71/TRM/4/2*WEAVER/6/SKAUZ/PARUS//PARUS*2/7/BECARD
EYT2013-14	6938585	SOKOLL/3/PASTOR//HXL7573/2*BAU/4/BECARD
EYT2013-14	6935075	SOKOLL/3/PASTOR//HXL7573/2*BAU*2/4/PASTOR//MILAN/KAUZ/3/BAV92
EYT2013-14	6937494	WEAVER/TSC//WEAVER/3/WEAVER/4/2*WAXWING/5/BECARD/6/HUW234+LR34/PRINIA//PFAU/WEAVER
EYT2013-14	6937493	WEAVER/TSC//WEAVER/3/WEAVER/4/2*WAXWING/5/BECARD/6/HUW234+LR34/PRINIA//PFAU/WEAVER
EYT2013-14	6937250	WBLL1*2/BRAMBLING//KINGBIRD #1
EYT2013-14	6937489	WEAVER/TSC//WEAVER/3/WEAVER/4/2*WAXWING/5/BECARD/6/HUW234+LR34/PRINIA//PFAU/WEAVER
EYT2013-14	6938334	KAUZ*2/BOW//KAUZ/3/W98.6.38/5/SABUF/4/ALTAR 84/AE.SQUARROSA (224)//CUPE/3/CROC_1/AE.SQUARROSA (205)//F27202/6/KINGBIRD #1/7/BAJ #1
EYT2013-14	6937486	WEAVER/TSC//WEAVER/3/WEAVER/4/2*WAXWING/5/BECARD/6/HUW234+LR34/PRINIA//PFAU/WEAVER
EYT2013-14	6938333	KAUZ*2/BOW//KAUZ/3/W98.6.38/5/SABUF/4/ALTAR 84/AE.SQUARROSA (224)//CUPE/3/CROC_1/AE.SQUARROSA (205)//F27202/6/KINGBIRD #1/7/BAJ #1
EYT2013-14	6938573	BAVIS/PAURAQ
EYT2013-14	6936392	NELOKI/KINGBIRD #1//NELOKI
EYT2013-14	6931705	BECARD*2/DANPHE #1
EYT2013-14	6931707	BECARD*2/PFUNYE #1
EYT2013-14	6932860	LERKE/5/KAUZ/3/MYNA/VUL//BUC/FLK/4/MILAN/6/PROGRESO F2007/7/MUNAL/8/MUNAL #1
EYT2013-14	6937070	KIRITATI//2*PRL/2*PASTOR/3/HUHWA
EYT2013-14	6862314	PFUNYE #1/KINGBIRD #1/6/PFAU/MILAN/5/CHEN/AEGILOPS SQUARROSA (TAUS)//BCN/3/VEE#7/BOW/4/PASTOR
EYT2013-14	6862797	ND643/2*WAXWING//PFUNYE #1
EYT2013-14	6932621	MUNAL #1/2*FRNCLN
EYT2013-14	6932863	LERKE/5/KAUZ/3/MYNA/VUL//BUC/FLK/4/MILAN/6/PROGRESO F2007/7/MUNAL/8/MUNAL #1
EYT2013-14	6932622	MUNAL #1/2*FRNCLN
EYT2013-14	6938395	QUAIU*2/PANDORA
EYT2013-14	6938153	WAXWING*2/KRONSTAD F2004*2//BECARD
EYT2013-14	6938152	WAXWING*2/KRONSTAD F2004*2//BECARD
EYT2013-14	6938150	WAXWING*2/KRONSTAD F2004*2//BECARD
EYT2013-14	6738288	MERCATO//JNRB.5/PIFED
EYT2013-14	6862300	SUP152*2/5/KIRITATI/4/2*SERI.1B*2/3/KAUZ*2/BOW//KAUZ
EYT2013-14	6862303	SUP152*2/4/HUW234+LR34/PRINIA//PBW343*2/KUKUNA/3/ROLF07
EYT2013-14	6862787	ND643/2*WBLL1/4/HUW234+LR34/PRINIA//PBW343*2/KUKUNA/3/ROLF07
EYT2013-14	6932619	MUNAL #1*2/FRNCLN
EYT2013-14	6938149	WAXWING*2/KRONSTAD F2004*2//BECARD
EYT2013-14	6938147	WAXWING*2/KRONSTAD F2004*2//BECARD
EYT2013-14	6938142	WAXWING*2/KRONSTAD F2004*2/4/PRL/2*PASTOR//PBW343*2/KUKUNA/3/ROLF07
EYT2013-14	6938141	WAXWING*2/KRONSTAD F2004*2/4/PRL/2*PASTOR//PBW343*2/KUKUNA/3/ROLF07
EYT2013-14	6862771	PRL/SARA//TSI/VEE#5/3/TILHI/4/ATTILA/2*PASTOR/5/KINGBIRD #1
EYT2013-14	6931754	DANPHE #1//BRBT1*2/KIRITATI/3/DANPHE
EYT2013-14	6937284	SNB//CMH79A.955/3*CNO79/3/ATTILA/4/CHEN/AEGILOPS SQUARROSA (TAUS)//BCN/3/2*KAUZ/5/KINGBIRD #1
EYT2013-14	6932835	SHA7/VEE#5/5/VEE#8//JUP/BJY/3/F3.71/TRM/4/2*WEAVER/6/SKAUZ/PARUS//PARUS*2/7/KINGBIRD #1
EYT2013-14	6932429	BAJ #1*2/5/SW89.5277/BORL95//SKAUZ/3/PRL/2*PASTOR/4/HEILO
EYT2013-14	6932894	PICAFLOR #2*2/3/PBW343*2/KUKUNA//PBW343*2/KUKUNA
EYT2013-14	6932658	WAXWING*2/KRONSTAD F2004*2//BECARD
EYT2013-14	6862745	PFAU/MILAN/5/CHEN/AEGILOPS SQUARROSA (TAUS)//BCN/3/VEE#7/BOW/4/PASTOR/6/KINGBIRD #1
EYT2013-14	6932418	BAJ #1*2/BECARD
EYT2013-14	6932411	PASTOR/HEILO//HEILO/3/2*PICAFLOR #2
EYT2013-14	6932413	PASTOR/HEILO//HEILO/3/2*PICAFLOR #2
EYT2013-14	6937092	WHEAR/KUKUNA/3/C80.1/3*BATAVIA//2*WBLL1/4/HUW234+LR34/PRINIA//PBW343*2/KUKUNA/3/ROLF07
EYT2013-14	6862975	SERI.1B*2/3/KAUZ*2/BOW//KAUZ/5/CNO79//PF70354/MUS/3/PASTOR/4/BAV92/6/KINGBIRD #1
EYT2013-14	6932401	ELVIRA/5/CNDO/R143//ENTE/MEXI75/3/AE.SQ/4/2*OCI/6/VEE/PJN//KAUZ/3/PASTOR/7/TILHI/4/CROC_1/AE.SQUARROSA (213)//PGO/3/CMH81.38/2*KAUZ/8/PICAFLOR #2
EYT2013-14	6932403	ELVIRA/5/CNDO/R143//ENTE/MEXI75/3/AE.SQ/4/2*OCI/6/VEE/PJN//KAUZ/3/PASTOR/7/TILHI/4/CROC_1/AE.SQUARROSA (213)//PGO/3/CMH81.38/2*KAUZ/8/PICAFLOR #2
EYT2013-14	6931780	PAURAQ/4/HUW234+LR34/PRINIA//PBW343*2/KUKUNA/3/ROLF07
EYT2013-14	6931781	PAURAQ/4/HUW234+LR34/PRINIA//PBW343*2/KUKUNA/3/ROLF07
EYT2013-14	6938177	PBW343*2/KUKUNA//PBW343*2/KUKUNA/3/KINGBIRD #1/4/PBW343*2/KUKUNA//PBW343*2/KUKUNA
EYT2013-14	6937088	WHEAR/KUKUNA/3/C80.1/3*BATAVIA//2*WBLL1/4/HUW234+LR34/PRINIA//PBW343*2/KUKUNA/3/ROLF07
EYT2013-14	6937090	WHEAR/KUKUNA/3/C80.1/3*BATAVIA//2*WBLL1/4/HUW234+LR34/PRINIA//PBW343*2/KUKUNA/3/ROLF07
EYT2013-14	6932636	MUNAL #1*2/KINGBIRD #1
EYT2013-14	6932631	MUNAL #1*2//WHEAR/SOKOLL
EYT2013-14	6933310	PFAU/SERI.1B//AMAD/3/INQALAB 91*2/KUKUNA/4/WBLL1*2/KURUKU/5/TRCH/SRTU//KACHU
EYT2013-14	6932463	KACHU*2/PANDORA
EYT2013-14	6933311	PFAU/SERI.1B//AMAD/3/INQALAB 91*2/KUKUNA/4/WBLL1*2/KURUKU/5/TRCH/SRTU//KACHU
EYT2013-14	6862030	MUTUS*2/KIRITATI
EYT2013-14	6932229	TRCH*2//WHEAR/SOKOLL
EYT2013-14	6933319	MELON//FILIN/MILAN/3/FILIN/8/ATTILA*2/PBW65/6/PVN//CAR422/ANA/5/BOW/CROW//BUC/PVN/3/YR/4/TRAP#1/7/ATTILA/2*PASTOR
EYT2013-14	6933313	PFAU/SERI.1B//AMAD/3/INQALAB 91*2/KUKUNA/4/WBLL1*2/KURUKU/5/TRCH/SRTU//KACHU
EYT2013-14	6932693	PBW343*2/KUKUNA//PBW343*2/KUKUNA/3/PRL/2*PASTOR//PBW343*2/KUKUNA/4/PBW343*2/KUKUNA//PBW343*2/KUKUNA
EYT2013-14	6933301	OTUS//PRL/2*PASTOR/5/SERI.1B//KAUZ/HEVO/3/AMAD*2/4/KIRITATI
EYT2013-14	6862021	MUTUS*2/KIRITATI
EYT2013-14	6862028	MUTUS*2/KIRITATI
EYT2013-14	6932459	KACHU/2*MUNAL #1
EYT2013-14	6933309	PFAU/SERI.1B//AMAD/3/INQALAB 91*2/KUKUNA/4/WBLL1*2/KURUKU/5/TRCH/SRTU//KACHU
EYT2013-14	6936812	HUHWA/KINGBIRD #1
EYT2013-14	6932458	KACHU*2/BECARD
EYT2013-14	6931593	C80.1/3*BATAVIA//2*WBLL1/3/PBW343*2/KUKUNA/4/FRANCOLIN #1
EYT2013-14	6931590	SUP152/KACHU
EYT2013-14	6862015	ROLF07*2/KINGBIRD #1
EYT2013-14	6932430	BAJ #1*2/5/SW89.5277/BORL95//SKAUZ/3/PRL/2*PASTOR/4/HEILO
EYT2013-14	6934851	ALTIGO/BAVIS//BAVIS #1
EYT2013-14	6862002	SHA7//PRL/VEE#6/3/FASAN/4/HAAS8446/2*FASAN/5/CBRD/KAUZ/6/MILAN/AMSEL/7/FRET2*2/KUKUNA/8/PICAFLOR #1
EYT2013-14	6932436	WBLL4/KUKUNA//WBLL1*2/3/WAXWING*2/KRONSTAD F2004
EYT2013-14	6933351	SW2148/2*ROLF07/3/HUW234+LR34/PRINIA*2//SNLG
EYT2013-14	6862474	CROC_1/AE.SQUARROSA (205)//BORL95/3/PRL/SARA//TSI/VEE#5/4/FRET2/5/KINGBIRD #1
EYT2013-14	6938804	PASTOR//HXL7573/2*BAU/3/SOKOLL/WBLL1/4/MILAN/KAUZ//PRINIA/3/BAV92
EYT2013-14	6938803	PASTOR//HXL7573/2*BAU/3/SOKOLL/WBLL1/4/MILAN/KAUZ//PRINIA/3/BAV92
EYT2013-14	6938802	SOKOLL/3/PASTOR//HXL7573/2*BAU/4/WHEAR/SOKOLL
EYT2013-14	6689268	FRET2*2/BRAMBLING/3/WHEAR//2*PRL/2*PASTOR
EYT2013-14	6863318	DOY1/AE.SQUARROSA (447)/3/2*KA/NAC//TRCH
EYT2013-14	6936618	PBW343/PASTOR//OTUS/TOBA97*2/3/KINGBIRD #1
EYT2013-14	6933105	MELON//FILIN/MILAN/3/FILIN/4/PRINIA/PASTOR//HUITES/3/MILAN/OTUS//ATTILA/3*BCN/5/MELON//FILIN/MILAN/3/FILIN
EYT2013-14	6933104	MELON//FILIN/MILAN/3/FILIN/4/PRINIA/PASTOR//HUITES/3/MILAN/OTUS//ATTILA/3*BCN/5/MELON//FILIN/MILAN/3/FILIN
EYT2013-14	6932258	ATTILA*2/PBW65/3/OTUS//PRL/2*PASTOR/4/KIRITATI//HUW234+LR34/PRINIA
EYT2013-14	6936614	PBW343/PASTOR//OTUS/TOBA97*2/3/PICAFLOR #1
EYT2013-14	6932000	PFAU/SERI.1B//AMAD/3/KRONSTAD F2004/4/KINGBIRD #1
EYT2013-14	6932487	MUNAL/2*PANDORA
EYT2013-14	6863300	DOY1/AE.SQUARROSA (447)/3/KA/NAC//TRCH/4/ATTILA/PASTOR
EYT2013-14	6862457	PFAU/WEAVER*2//TRANSFER#12,P88.272.2/7/TNMU/6/CEP80111/CEP81165/5/IAC5/4/YKT406/3/AG/ASN//ATR/8/BABAX/LR42//BABAX*2/3/PAVON 7S3, +LR47
EYT2013-14	6863544	NGL/3/KA/NAC//TRCH
EYT2013-14	6937939	WBLL1*2/BRAMBLING//WHEAR/SOKOLL/3/WBLL1*2/BRAMBLING
EYT2013-14	6932009	WAXWING/KRONSTAD F2004//PRL
EYT2013-14	6932489	PAURAQUE #1/3/PBW343*2/KUKUNA//PBW343*2/KUKUNA/4/BAJ #1
EYT2013-14	6932249	ATTILA*2/PBW65/3/OTUS//PRL/2*PASTOR/4/KIRITATI//HUW234+LR34/PRINIA
EYT2013-14	6933323	INQALAB 91*2/KUKUNA//PFAU/WEAVER/3/INQALAB 91*2/KUKUNA/4/TRCH/SRTU//KACHU
EYT2013-14	6863532	PREMIO/5/CROC_1/AE.SQUARROSA (205)//BORL95/3/PRL/SARA//TSI/VEE#5/4/FRET2
EYT2013-14	6863533	PREMIO/5/CROC_1/AE.SQUARROSA (205)//BORL95/3/PRL/SARA//TSI/VEE#5/4/FRET2
EYT2013-14	6937923	QUAIU #1*2/MUNAL #1
EYT2013-14	6937922	QUAIU #1*2/MUNAL #1
EYT2013-14	6933397	WBLL1*2/4/SNI/TRAP#1/3/KAUZ*2/TRAP//KAUZ/5/KACHU/6/TRCH/SRTU//KACHU
EYT2013-14	6937512	SERI.1B*2/3/KAUZ*2/BOW//KAUZ/4/CIRCUS/5/2*PRL/2*PASTOR//PBW343*2/KUKUNA/3/ROLF07
EYT2013-14	6937754	PASTOR/HEILO//HEILO/3/2*PICAFLOR #2
EYT2013-14	6938842	WHEAR/SOKOLL/4/PASTOR//MILAN/KAUZ/3/BAV92
EYT2013-14	6933399	WBLL1*2/4/SNI/TRAP#1/3/KAUZ*2/TRAP//KAUZ/5/KACHU/6/TRCH/SRTU//KACHU
EYT2013-14	6939938	PASTOR//HXL7573/2*BAU/3/WBLL1/4/SOKOLL/3/PASTOR//HXL7573/2*BAU
EYT2013-14	6937511	SERI.1B*2/3/KAUZ*2/BOW//KAUZ/4/CIRCUS/5/2*PRL/2*PASTOR//PBW343*2/KUKUNA/3/ROLF07
EYT2013-14	6938841	WHEAR/SOKOLL/4/PASTOR//MILAN/KAUZ/3/BAV92
EYT2013-14	6938840	WHEAR/SOKOLL/4/PASTOR//MILAN/KAUZ/3/BAV92
EYT2013-14	6933396	WBLL1//UP2338*2/VIVITSI/3/TRCH/SRTU//KACHU
EYT2013-14	6937750	PASTOR/HEILO//HEILO/3/2*PICAFLOR #2
EYT2013-14	6933392	ATTILA*2/HUITES//FINSI/3/ATTILA*2/PBW65/4/TRCH/SRTU//KACHU
EYT2013-14	6933391	ATTILA*2/HUITES//FINSI/3/ATTILA*2/PBW65/4/TRCH/SRTU//KACHU
EYT2013-14	6939932	MEX94.2.19//SOKOLL/WBLL1/4/BERKUT/3/ATTILA*2//CHIL/BUC
EYT2013-14	6938834	MILAN/KAUZ//PRINIA/3/BAV92/4/BAVIS
EYT2013-14	6933145	URBINA S2007*2/3/GUAM92/KAUZ//ZHENGYOU 6
EYT2013-14	6938833	MON/IMU//ALD/PVN/3/BORL95/4/OASIS/2*BORL95/5/HUW234+LR34/PRINIA//PBW343*2/KUKUNA/3/ROLF07
EYT2013-14	6933147	BJY/COC//PRL/BOW/3/FRTL*2/4/QUAIU #1
EYT2013-14	6936896	QUAIU/FRNCLN
EYT2013-14	6939929	SOKOLL/3/PASTOR//HXL7573/2*BAU/4/MASSIV/PPR47.89C
EYT2013-14	6933385	BABAX/KS93U76//BABAX/3/ATTILA/3*BCN//TOBA97/4/WBLL1*2/KURUKU/6/FRET2*2/4/SNI/TRAP#1/3/KAUZ*2/TRAP//KAUZ*2/5/TUKURU
EYT2013-14	6933384	BABAX/KS93U76//BABAX/3/ATTILA/3*BCN//TOBA97/4/WBLL1*2/KURUKU/6/FRET2*2/4/SNI/TRAP#1/3/KAUZ*2/TRAP//KAUZ*2/5/TUKURU
EYT2013-14	6937509	SERI.1B*2/3/KAUZ*2/BOW//KAUZ/4/CIRCUS/5/2*PRL/2*PASTOR//PBW343*2/KUKUNA/3/ROLF07
[truncated: 2,691 more rows]
