# Supplementary material for: Validation of Candidate Gene-Based Markers and Identification of Novel Loci for Thousand-Grain Weight in Spring Bread Wheat
Source: Front Plant Sci. 2019 Sep 26;10:1189. doi: 10.3389/fpls.2019.01189 (PMC6775465; doi:10.3389/fpls.2019.01189)
Supplement: Supplementary file 2 [file Table_2.xlsx]

## Sheet: Sheet1
Supplementary Table 2: List of candidate genes associated with TGW used in the present study
Gene	Chromosome	Assay name	SNP or Indel	Allele 1			Allele 2			Original source	KASP assay reference
				SNP	Allele	Phenotype	SNP	Allele	Phenotype
TaCwi-A1	2A	TaCwi-2A-SNP	T/G	T	TaCwi-A1a	Higher TGW	G	TaCwi-A1b	Lower TGW	Ma et al. (2012)	CIMMYT, Mexico (this study)
TaSus2	2A	TaSus2-2A-SNP	Hap-A/G	A	Hap-A	Higher TGW	G	Hap-G	Lower TGW	Hou et al. (2014)	Rasheed et al. (2016)
TaSus2	2B	TaSus2-2B_SNP	T/C	C	Hap-H	Higher TGW	T	Hap-L	Lower TGW	Jiang et al. (2011)	CerealsDB
TaTGW6-A1	3A	TaTGW6_SNP	G/A	G	TaTGW6-A1a	Higher TGW	A	TaTGW6-A1b	Lower TGW	Hanif et al. (2016)	Rasheed et al. (2016)
TaGS5	3A	TaGS5-3A-SNP	G/T	G	TaGS5-A1a	Higher TGW	T	TaGS5-A1-b	Lower TGW	Wang et al. (2016)	Rasheed et al. (2016)
TaCKX-D1	3D	CKX-D1_IND	18 bp InDel	Del	TaCKX-D1a	Higher TGW	Ins	TaCKX-D1b	Lower TGW	Zhang et al. (2012)	Rasheed et al. (2016)
TaCwi	4A	TaCwI-4A_SNP	Hap-4A-T/C	T	Hap-4A-T	Higher TGW	C	Hap-4A-C	Lower TGW	Jiang et al. (2015)	Rasheed et al. (2016)
TaCwi	5D	CWI5D_SNP	C/G	C	Hap-5D-C	Higher TGW	G	Hap-5D-G	Lower TGW	Jiang et al. (2015)	Rasheed et al. (2016)
TaGW2	6A	TaGW2-6A_SNP	Hap-A/G	A	Hap-A	Increased grain width and higher TGW	G	Hap-G	Decreased grain width and lower TGW	Su et al. (2011)	CIMMYT, Mexico (this study)
TaTPP	6A	TaTPP-6AL-SNP	T/A	T	TPP-6AL1a	Higher TGW	A	TPP-6AL1b	Lower TGW	Zhang et al. (2017)	Rasheed et al. (2016)
TaGW2	6B	TaGW2-6B-SNP	A/C	A	Hap 1	Increased grain width and higher TGW	C	Hap 2,3,4	Decreased grain width and lower TGW	Qin et al. (2014)	Rasheed et al. (2016)
TaGASR-A1	7A	TaGASR_IND	2 kb InDel	Del	H1c (Jiamai type)	Increased grain length	Ins	H1g (Lumai14 type)	Decreased grain length	Dong et al. (2014)	Rasheed et al. (2016)
TaSus1	7A	TaSus1-7A-SNP	G/C	G	Hap 1,5	Higher/Lower TGW	C	Hap 2,3,4	Higher/Lower TGW	Hou et al. (2014)	Rasheed et al. (2016)
TaGS3-D1	7D	TaGS3-7D_SNP	G/T	G	TaGS3-D1a	Higher TGW and increased grain length	T	TaGD-D1b	Lower TGW and decreased grain length	Zhang et al. (2014a)	Rasheed et al. (2016)
