# Supplementary material for: Validation of Candidate Gene-Based Markers and Identification of Novel Loci for Thousand-Grain Weight in Spring Bread Wheat
Source: Front Plant Sci. 2019 Sep 26;10:1189. doi: 10.3389/fpls.2019.01189 (PMC6775465; doi:10.3389/fpls.2019.01189)
Supplement: Supplementary file 3 [file Table_3.xlsx]

## Sheet: Sheet1
Supplementary Table S3	KASP primer sequences designed in house
							FAM allele			VIC Allele
Gene	Chromosome	Assay name	SNP or Indel	FAM primer	VIC primer	Common primer reverse	SNP	Allele	Associated phenotype	SNP	Allele	Associated phenotype
TaCwi-A1	2A	TaCwi-A1a/b	T/G	CCTGATGAAACAAGTTAGTCCGGTAA	CTGATGAAACAAGTTAGTCCGGTAC	GCGTGTGGTGATGAGTTCATGGTTA	T	TaCwi-A1a	Higher grain weight	G	TaCwi-A1b	Lower grain weight
TaGW2	6A	TaGW2-HAP-A/G	A/G	AGGGTGAGACGAAAATAAATCGG	AGGGTGAGACGAAAATAAATCGA	CGCATCACCTACCCCTTCAT	G	Hap-6A-G	Lower grain weight	A	Hap-6A-A	Higher grain weight
