# Supplementary material for: Validation of Candidate Gene-Based Markers and Identification of Novel Loci for Thousand-Grain Weight in Spring Bread Wheat
Source: Front Plant Sci. 2019 Sep 26;10:1189. doi: 10.3389/fpls.2019.01189 (PMC6775465; doi:10.3389/fpls.2019.01189)
Supplement: Supplementary file 4 [file Table_4.xlsx]

## Sheet: Sheet1
Supplementary Table S4	Phenotypic correlations (Pearson's correlation) between TGW and GY in 5 EYTs across multiple environments
EYT2011-12	TGW	GYB-5IR	GYF-5IR	GYB-2IR	GYHS5IR	GYDS
TGW		0.60824	0.001093	0.045629	0.096288	0.003602
GYB-5IR	0.020267		1.1527e-18	2.6119e-05	1.6821e-11	0.26766
GYF-5IR	0.12849	0.3384		0.010061	4.5344e-29	3.318e-18
GYB-2IR	0.078856	0.16514	0.10143		4.8906e-16	4.8561e-11
GYHS5IR	0.065644	0.26153	0.42141	0.31255		4.3517e-22
GYDS	0.11465	0.043812	0.33385	0.25549	0.36829
EYT2012-13	TGW	GYDS	GYB-2IR	GYF-5IR	GYB-5IR	GYHS
TGW		0.23585	1.1537e-14	0.55243	0.11373	0.045222
GYDS	0.041697		1.0538e-10	0.36091	0.56518	2.961e-07
GYB-2IR	0.26677	0.21254		0.33531	2.3801e-05	0.64832
GYF-5IR	-0.020905	0.030405	0.032063		2.7279e-40	0.78593
GYB-5IR	-0.055616	0.019144	0.13997	0.42153		0.95914
GYHS	-0.070385	0.16939	-0.015181	-0.0090404	-0.0017052
EYT2013-14	TGW	GYB-5IR	GYF-5IR	GYB-2IR	GYDS	GYHS
TGW		0.027913	0.027916	1.6519e-19	9.3539e-17	0.002354
GYB-5IR	0.073084		1.7121e-34	7.3631e-05	0.051744	2.2445e-06
GYF-5IR	0.073083	0.39134		1.519e-10	1.123e-05	1.1775e-13
GYB-2IR	0.29405	0.13139	0.21075		1.5201e-73	5.9775e-19
GYDS	0.27149	0.064684	0.14542	0.55276		4.1958e-06
GYHS	0.10098	0.15648	0.24325	0.28964	0.15227
EYT2014-15	TGW	GYB-5IR	GYF-5IR	GYB-2IR	GYDS	GYHS
TGW		0.037166	7.8778e-05	6.4404e-06	0.18847	0.19296
GYB-5IR	0.069285		6.1955e-65	9.3483e-37	0.14031	3.209e-06
GYF-5IR	0.13086	0.52389		2.0469e-25	0.0011754	2.6636e-13
GYB-2IR	0.14933	0.4035	0.33662		1.7192e-10	3.9816e-05
GYDS	-0.043756	0.049057	0.1077	0.21015		0.00010254
GYHS	0.043315	0.15409	0.23978	0.13612	0.12877
EYT2015-16	TKW	GYDS	GYB-2IR	GYF-5IR	GYB-5IR	GYHS
TKW		1.1083e-32	1.6695e-12	0.11044	0.10518	1.5513e-07
GYDS	0.3972		7.0161e-88	0.026282	0.16405	0.00046252
GYB-2IR	0.24191	0.61662		0.6352	0.073157	0.049743
GYF-5IR	0.05548	0.077222	-0.016501		0.00023912	4.8365e-06
GYB-5IR	-0.056348	-0.048435	0.062305	0.12734		9.502e-17
GYHS	-0.18098	-0.12142	0.068173	-0.15802	0.28331
Footnote:	Values below diagonal are correlation values and values above diagonal are P values.
	B-5IR, F-5IR, B-2IR, DS and HS respresent five environments induced at CENEB station;
	B-5IR represents Bed management with 5 irrigations, F-5IR represents Flat management with 5 irrigations, B-2IR represents Bed management with 2 irrigations, DS represents Bed management with drip irrigation, HS represents Bed management with 5 irrigations but planting delayed by 3 months to induce heat stress
