# Supplementary material for: Validation of Candidate Gene-Based Markers and Identification of Novel Loci for Thousand-Grain Weight in Spring Bread Wheat
Source: Front Plant Sci. 2019 Sep 26;10:1189. doi: 10.3389/fpls.2019.01189 (PMC6775465; doi:10.3389/fpls.2019.01189)
Supplement: Supplementary file 6 [file Table_6.xlsx]

## Sheet: Sheet1
Table S6 Minor TGW loci identified in EYTs
	Mean TGW (grams)			Favorable haplotype
Hap-1B-4	EYT2012-13	EYT2014-15
AT	48.7216	47.9968		√
GC	45.7605	46.6227
Favorable allele effect in grams	2.96112	1.37406
Hap-1B-6	EYT2012-13	EYT2014-15
ACGC	47.9081	47.6521
GTTG	48.7106	47.9789		√
Favorable allele effect in grams	0.80249	0.326835
Hap-1B-8	EYT2013-14	EYT2015-16
CATT	46.6013	45.4337		√
GGCC	46.3493	44.4475
Favorable allele effect in grams	0.251985	0.98619
Hap-2A-23	EYT2011-12	EYT2013-14	EYT2015-16
CA	44.1664	46.4072	44.4418
TC	44.6947	47.2713	45.2517	√
Favorable allele effect in grams	0.528281	0.86408	0.809874
Hap-2B-32	EYT2012-13	EYT2013-14
GC	47.1108	45.315
TC	49.5877	46.9669		√
TT	47.0265	46.2819
Favorable allele effect in grams	2.5612	1.65193
Hap-3A-22	EYT2011-12	EYT2014-15
CG	44.677	47.4736		√
TC	43.7007	46.3351
Favorable allele effect in grams	0.976305	1.13843
Hap-3B-17	EYT2013-14	EYT2014-15	EYT2015-16
CA	46.8751	47.8728	45.0048	√
TG	46.0151	47.4265	43.7556
Favorable allele effect in grams	0.860072	0.446287	1.24915
Hap-5D-4	EYT2011-12	EYT2013-14	EYT2015-16
CG	45.0006	47.2557	44.7133	√
TA	44.1371	46.5928	44.4212
Favorable allele effect in grams	0.863478	0.662902	0.292152
Hap-6A-15	EYT2013-14	EYT2014-15
AT	47.2801	48.5564		√
CC	45.7892	46.6459
Favorable allele effect in grams	1.49082	1.91052
Hap-6B-1	EYT2012-13	EYT2013-14	EYT2014-15
CAA	48.2874	46.5455	47.4239
CAC	48.999	47.2842	48.1032	√
TTC	48.3258	46.1225	48.11
Favorable allele effect in grams	0.711598	1.16171	0.68602
Hap-6B-19	EYT2013-14	EYT2014-15	EYT2015-16
CT	46.4033	46.74	44.142
TG	46.9029	48.1762	44.9005	√
Favorable allele effect in grams	0.499546	1.43622	0.758527
