# Supplementary material for: Validation of Candidate Gene-Based Markers and Identification of Novel Loci for Thousand-Grain Weight in Spring Bread Wheat
Source: Front Plant Sci. 2019 Sep 26;10:1189. doi: 10.3389/fpls.2019.01189 (PMC6775465; doi:10.3389/fpls.2019.01189)
Supplement: Supplementary file 7 [file Table_7.xlsx]

## Sheet: Sheet1
Supplementary Table S7 Epistatic interactions among major and minor effect loci
Nursery	Two locus interactions	R2	Three locus interactions	R2
EYT2011-12	Hap-7A-15(CT) Hap-3B-17(AC)	0.052	-	-
	Hap-7A-15(CG) Hap-6A-15(AT)	0.047	-	-
EYT2012-13	Hap-7A-15(CT) Hap-4A-14(TT)	0.044	Hap-7A-15(CT) Hap-4A-14(TT) Hap-3A-22(CT)	0.056
EYT2013-14	Hap-4A-19(GT) Hap-6A-15(CC)	0.028	Hap-4A-19(GT) Hap-4A-14(CC) Hap-6A-15(CC)	0.049
	Hap-4A-19(AC) Hap-6B-19(GT)	0.026	Hap-4A-19(GT) Hap-6A-15(CC)	0.053
			Hap-4A-19(AC) Hap-4A-14(TT) Hap-6B-19(GT)	0.028
EYT2014-15	Hap-7A-15(CG) Hap-6B-19(GT)	0.073	Hap-7A-15(CG) Hap-6B-19(GT) Hap-6A-15(AT)	0.1
	Hap-7A-15(CG) Hap-6A-15(AT)	0.089	Hap-7A-15(CG) Hap-6A-15(AT) Hap-1B-4 (AT)	0.116
EYT2015-16	Hap-4A-14(CC) Hap-3B-17(GT)	0.071	Hap-4A-19(GT) Hap-4A-14(CC) Hap-3B-17(GT)	0.073
